# Supplementary material
Source: PubMed Central journal article supplement (PMC3508169)
Supplement: NIHMS396959-supplement-Supplementary_material_.pdf [file NIHMS396959-supplement-Supplementary_material_.pdf]

# AN OPTIMIZED ISOLATION OF BIOTINYLATED CELL SURFACE PROTEINS REVEALS NOVEL PLAYERS IN CANCER METASTASIS

Piia-Riitta Karhemo<sup>1</sup>, Suvi Ravela<sup>2</sup>, Marko Laakso<sup>3</sup>, Ilja Ritamo<sup>4</sup>, Olga Tatti<sup>1,5</sup>, Selina Mäkinen<sup>1</sup>, Steve Goodison<sup>6</sup>, Ulf-Håkan Stenman<sup>2</sup>, Erkki Hölttä<sup>5</sup>, Sampsa Hautaniemi<sup>3</sup>, Leena Valmu<sup>4</sup>, Kaisa Lehti<sup>3,5</sup> and Pirjo Laakkonen\*<sup>1,7</sup>

<sup>1</sup>Research Programs Unit, Molecular Cancer Biology, Biomedicum Helsinki and Institute of Biomedicine, University of Helsinki, Finland; <sup>2</sup>Department of Clinical Chemistry, University of Helsinki, Finland; <sup>3</sup>Research Programs Unit, Genome Scale Biology, Biomedicum Helsinki, University of Helsinki, Finland; <sup>4</sup>Finnish Red Cross Blood Services, Finland; <sup>5</sup>Department of Pathology, Haartman Institute, University of Helsinki, Finland; <sup>6</sup>MD. Anderson Cancer Center-Orlando, Florida, USA; <sup>7</sup>K. Albin Johansson Senior Cancer Researcher, Foundation for the Finnish Cancer Institute, Finland.

## Metastasis Associated Proteins (excluding HLA)

November 15, 2011

### Abstract

This Moksiskaan analysis describes the known relationships between the metastasis associated proteins and the other proteins and data sets associated to them. All HLA proteins are excluded from this report. Protein-protein interactions are filtered so that the network is formed between the genes with an expression correlation in [The Cancer Genome Atlas](#) breast cancer samples. The actual article hosting this supplementary document is titled: *An optimized isolation of biotinylated cell surface proteins reveals novel players in cancer metastasis.*

This document is generated automatically by Anduril (Engine 1.2.5). Section 3 provides a detailed description of the analysis and the versions of the data sources in use.

# Contents

|          |                                                       |           |
|----------|-------------------------------------------------------|-----------|
| <b>1</b> | <b>Candidate report for the protein functions</b>     | <b>3</b>  |
| 1.1      | Moksiskaan candidate pathway . . . . .                | 3         |
| 1.1.1    | GO enrichment of the candidate pathway . . . . .      | 6         |
| 1.2      | Candidate genes . . . . .                             | 11        |
| 1.2.1    | GO enrichment of all candidates . . . . .             | 13        |
| <b>2</b> | <b>Candidate report for the proteins interactions</b> | <b>16</b> |
| 2.1      | Moksiskaan candidate pathway . . . . .                | 16        |
| 2.2      | Candidate genes . . . . .                             | 22        |
| <b>3</b> | <b>System configuration</b>                           | <b>24</b> |
| 3.1      | System configurations . . . . .                       | 24        |



Table 1: This table describes the actual genes of each set of combined nodes in Figure 1.

| ID      | Members                                                                                                                                                                                                         |
|---------|-----------------------------------------------------------------------------------------------------------------------------------------------------------------------------------------------------------------|
| group1  | ACTB, ACTG1                                                                                                                                                                                                     |
| group2  | cell-cell adhesion, phosphorylation                                                                                                                                                                             |
| group3  | cellular protein metabolic process, lipid storage, lipid transport, lipoprotein metabolic process, low-density lipoprotein particle receptor biosynthetic process, macrophage derived foam cell differentiation |
| group4  | cysteine-type endopeptidase activity, interleukin-12 production, macrophage activation, T cell mediated immune response to tumor cell                                                                           |
| group5  | DYNC1H1, DYNC1H1, DYNC1H2, DYNC1L1, DYNC1L2, DYNC2H1                                                                                                                                                            |
| group6  | epidermal growth factor receptor signaling pathway, nerve growth factor receptor signaling pathway                                                                                                              |
| group7  | innate immune response, interferon-alpha production, interleukin-10 production                                                                                                                                  |
| group8  | interferon-gamma production, interleukin-6 production                                                                                                                                                           |
| group9  | LAMA1, LAMA2, LAMA3, LAMA4, LAMA5, LAMB2, LAMB3, LAMB4, LAMC2, LAMC3                                                                                                                                            |
| group10 | osteoblast proliferation, phagocytosis                                                                                                                                                                          |
| group11 | RP11-631M21.2, TUBB1, TUBB2A, TUBB2B, TUBB3, TUBB4, TUBB4Q, TUBB6                                                                                                                                               |
| group12 | TUBB, TUBB2C                                                                                                                                                                                                    |

Table 2: Descriptions of the intermediated genes between the candidate genes. Studies that have reported results about the candidate genes are listed so that those with negative evidence have been prefixed with a hyphen. This table has 49 rows.

| name                 | description                                                                                                           | studies                                                                                                                                                                                                                                                                                                               |
|----------------------|-----------------------------------------------------------------------------------------------------------------------|-----------------------------------------------------------------------------------------------------------------------------------------------------------------------------------------------------------------------------------------------------------------------------------------------------------------------|
| <b>ACTB</b>          | actin, beta [Source:HGNC Symbol;Acc:132] locus=7:5566782-5603415                                                      | tcgaOvarianMethyl                                                                                                                                                                                                                                                                                                     |
| <b>ACTG1</b>         | actin, gamma 1 [Source:HGNC Symbol;Acc:144] locus=17:79476999-79479827                                                | tcgaGliomaGE, tcgaOvarianMethyl, tscapMelanoma, tscapNSCLCa, tcgaBreastGE, tcgaColonMethyl, tcgaOvarianMethyl, tscapHCCA, tscapProstate                                                                                                                                                                               |
| <b>ARHGEF2</b>       | Rho/Rac guanine nucleotide exchange factor (GEF) 2 [Source:HGNC Symbol;Acc:682] locus=1:155916645-155966129           | snp3dLungC, tcgaBreastGE, tcgaBreastMethyl, tcgaColonGE, tcgaColonMethyl, tcgaGliomaGE, tcgaOvarianMethyl, tscapMelanoma, tscapNSCLCa, tcgaBreastGE, tcgaBreastMethyl, tcgaOvarianMethyl, tscapNSCLCa                                                                                                                 |
| <b>CAV1</b>          | caveolin 1, caveolae protein, 22kDa [Source:HGNC Symbol;Acc:1527] locus=7:116164839-116201233                         | tcgaBreastMethyl, tcgaColonGE, tcgaColonMethyl, tcgaGliomaGE, tcgaOvarianMethyl, tscapMelanoma, tscapNSCLCa, tcgaBreastGE, tcgaBreastMethyl, tcgaOvarianMethyl, tscapNSCLCa                                                                                                                                           |
| <b>CAV2</b>          | caveolin 2 [Source:HGNC Symbol;Acc:1528] locus=7:115927434-116148595                                                  | tcgaBreastMethyl, tcgaOvarianMethyl, tscapNSCLCa                                                                                                                                                                                                                                                                      |
| <b>CAV3</b>          | caveolin 3 [Source:HGNC Symbol;Acc:1529] locus=3:8775486-8883492                                                      | tcgaBreastGE, tcgaColonGE                                                                                                                                                                                                                                                                                             |
| <b>CTNNA1</b>        | catenin (cadherin-associated protein), beta 1, 88kDa [Source:HGNC Symbol;Acc:2514] locus=3:41236328-41301587          | cosmicPrimary, cosmicRecurrent, snp3dCRC, snp3dLungC, snp3dMetastasis, tcgaBreastMethyl, tcgaColonMethyl, tcgaGliomaGE, tcgaOvarianMethyl, tscapMelanoma                                                                                                                                                              |
| <b>DYNC1H1</b>       | dynein, cytoplasmic 1, heavy chain 1 [Source:HGNC Symbol;Acc:2961] locus=14:102430865-102517129                       | cosmicPrimary, tcgaBreastGE, tcgaGliomaGE, tcgaOvarianMethyl, tscapMelanoma                                                                                                                                                                                                                                           |
| <b>DYNC1H1</b>       | dynein, cytoplasmic 1, intermediate chain 1 [Source:HGNC Symbol;Acc:2963] locus=7:95401866-95739634                   | tcgaBreastGE, tcgaBreastMethyl, tcgaColonMethyl, tcgaGliomaGE, tcgaOvarianMethyl, tscapNSCLCa                                                                                                                                                                                                                         |
| <b>DYNC1H2</b>       | dynein, cytoplasmic 1, intermediate chain 2 [Source:HGNC Symbol;Acc:2964] locus=2:172543919-172604930                 | tcgaBreastGE, tcgaGliomaGE, tcgaOvarianMethyl                                                                                                                                                                                                                                                                         |
| <b>DYNC1L1</b>       | dynein, cytoplasmic 1, light intermediate chain 1 [Source:HGNC Symbol;Acc:18745] locus=3:32567463-32612366            | tcgaColonGE, tscapOvarian, tcgaBreastGE                                                                                                                                                                                                                                                                               |
| <b>DYNC1L2</b>       | dynein, cytoplasmic 1, light intermediate chain 2 [Source:HGNC Symbol;Acc:2966] locus=16:66754796-66785701            | tcgaBreastMethyl, tcgaColonMethyl, tcgaOvarianMethyl, tscapNSCLCa                                                                                                                                                                                                                                                     |
| <b>DYNC2H1</b>       | dynein, cytoplasmic 2, heavy chain 1 [Source:HGNC Symbol;Acc:2962] locus=11:102980160-103350591                       | tcgaBreastMethyl, tcgaOvarianMethyl, tscapNSCLCa, tscapRCCd                                                                                                                                                                                                                                                           |
| <b>GJA1</b>          | gap junction protein, alpha 1, 43kDa [Source:HGNC Symbol;Acc:4274] locus=6:121756791-121770873                        | tcgaBreastMethyl, tcgaColonMethyl, tcgaOvarianMethyl, tscapNSCLCa, tscapNSCLCd                                                                                                                                                                                                                                        |
| <b>HBEGF</b>         | heparin-binding EGF-like growth factor [Source:HGNC Symbol;Acc:3059] locus=5:139712428-139726216                      | snp3dDiabetes, snp3dObesity, tcgaColonGE, tcgaColonMethyl, snp3dBC, snp3dDiabetes, snp3dObesity, tcgaBreastGE, tcgaColonMethyl, tcgaOvarianMethyl, tscapNSCLCd, tscapRCCd, snp3dDiabetes, snp3dObesity, tcgaBreastGE, tcgaBreastMethyl, tcgaColonGE, tcgaOvarianMethyl, tscapBCd, tscapCRCA, tscapNSCLCa, tscapNSCLCa |
| <b>ILK</b>           | integrin-linked kinase [Source:HGNC Symbol;Acc:6040] locus=11:6624961-6632102                                         | tcgaBreastMethyl, tcgaColonMethyl, tcgaOvarianMethyl, tscapNSCLCd                                                                                                                                                                                                                                                     |
| <b>INSR</b>          | insulin receptor [Source:HGNC Symbol;Acc:6091] locus=19:7112266-7294011                                               | tcgaBreastMethyl, tcgaColonMethyl, tcgaOvarianMethyl, tscapNSCLCd                                                                                                                                                                                                                                                     |
| <b>IRS1</b>          | insulin receptor substrate 1 [Source:HGNC Symbol;Acc:6125] locus=2:227599757-227664475                                | tcgaBreastMethyl, tcgaColonMethyl, tcgaOvarianMethyl, tscapNSCLCd, tscapRCCd                                                                                                                                                                                                                                          |
| <b>IRS2</b>          | insulin receptor substrate 2 [Source:HGNC Symbol;Acc:6126] locus=13:110406184-110438915                               | snp3dDiabetes, snp3dObesity, tcgaBreastGE, tcgaBreastMethyl, tcgaColonGE, tcgaOvarianMethyl, tscapBCd, tscapCRCA, tscapNSCLCa, tscapNSCLCa                                                                                                                                                                            |
| <b>IRS4</b>          | insulin receptor substrate 4 [Source:HGNC Symbol;Acc:6128] locus=X:107975712-107979651                                | tcgaBreastMethyl, tcgaColonMethyl, cosmicMetastasis, cosmicPrimary                                                                                                                                                                                                                                                    |
| <b>LAMA1</b>         | laminin, alpha 1 [Source:HGNC Symbol;Acc:6481] locus=18:6941743-7117813                                               | tcgaBreastMethyl, tcgaColonMethyl, tcgaGliomaGE, tcgaOvarianGE, tscapCRCD                                                                                                                                                                                                                                             |
| <b>LAMA2</b>         | laminin, alpha 2 [Source:HGNC Symbol;Acc:6482] locus=6:129204286-129837714                                            | tcgaBreastGE, tcgaBreastMethyl, tcgaGliomaGE                                                                                                                                                                                                                                                                          |
| <b>LAMA3</b>         | laminin, alpha 3 [Source:HGNC Symbol;Acc:6483] locus=18:21269562-21535030                                             | tcgaBreastGE, tcgaColonMethyl, tcgaOvarianMethyl, tscapNSCLCa, tscapOvariana                                                                                                                                                                                                                                          |
| <b>LAMA4</b>         | laminin, alpha 4 [Source:HGNC Symbol;Acc:6484] locus=6:112429963-112576141                                            | fileBC2brain, tcgaBreastGE, tcgaBreastMethyl, tcgaColonMethyl, tscapCRCD                                                                                                                                                                                                                                              |
| <b>LAMA5</b>         | laminin, alpha 5 [Source:HGNC Symbol;Acc:6485] locus=20:60883011-60942368                                             | tcgaBreastGE, tcgaBreastMethyl, tcgaColonGE, tcgaColonMethyl, tcgaGliomaGE, tcgaOvarianCGHa, tscapBCa                                                                                                                                                                                                                 |
| <b>LAMB1</b>         | laminin, beta 1 [Source:HGNC Symbol;Acc:6486] locus=7:107564244-107643700                                             | tcgaBreastGE, tcgaBreastMethyl, tcgaColonMethyl, tcgaGliomaGE, tcgaOvarianMethyl                                                                                                                                                                                                                                      |
| <b>LAMB2</b>         | laminin, beta 2 (laminin S) [Source:HGNC Symbol;Acc:6487] locus=3:49158547-49170551                                   | tcgaGliomaGE                                                                                                                                                                                                                                                                                                          |
| <b>LAMB3</b>         | laminin, beta 3 [Source:HGNC Symbol;Acc:6490] locus=1:209788220-209825811                                             | tcgaBreastGE, tcgaBreastGESurv, tcgaBreastMethyl, tcgaColonMethyl, tcgaOvarianMethyl                                                                                                                                                                                                                                  |
| <b>LAMB4</b>         | laminin, beta 4 [Source:HGNC Symbol;Acc:6491] locus=7:107663993-107770801                                             | tcgaBreastGE, tcgaColonMethyl, tcgaGliomaGE, tcgaOvarianMethyl                                                                                                                                                                                                                                                        |
| <b>LAMC1</b>         | laminin, gamma 1 (formerly LAMB2) [Source:HGNC Symbol;Acc:6492] locus=1:182992597-183114727                           | tcgaBreastGE, tcgaBreastMethyl, tcgaColonMethyl, tcgaOvarianMethyl, tscapNSCLCa                                                                                                                                                                                                                                       |
| <b>LAMC2</b>         | laminin, gamma 2 [Source:HGNC Symbol;Acc:6493] locus=1:183155373-183214035                                            | tcgaBreastGE, tcgaBreastMethyl, tcgaColonMethyl, tcgaOvarianMethyl, tscapNSCLCa                                                                                                                                                                                                                                       |
| <b>LAMC3</b>         | laminin, gamma 3 [Source:HGNC Symbol;Acc:6494] locus=9:133884469-133969860                                            | tcgaBreastGE, tcgaBreastMethyl, tcgaColonMethyl, tcgaOvarianMethyl, tscapNSCLCa, tscapOvariana                                                                                                                                                                                                                        |
| <b>PRKCA</b>         | protein kinase C, alpha [Source:HGNC Symbol;Acc:9393] locus=17:64298944-64801114                                      | cosmicRecurrent, snp3dGlioma, snp3dLungC, snp3dProstateC, tcgaBreastMethyl, tcgaColonMethyl, tcgaGliomaGE, tcgaOvarianMethyl, tcgaColonGE, tcgaGliomaGE, tcgaBreastMethyl, tcgaColonGE, tcgaGliomaGE, tscapBCa, tscapNSCLCa, tscapOvariana                                                                            |
| <b>PRKCB</b>         | protein kinase C, beta [Source:HGNC Symbol;Acc:9395] locus=16:23847322-24231932                                       | snp3dBC, tcgaBreastGE, tcgaBreastMethyl, tcgaColonMethyl, tcgaOvarianMethyl, tscapNSCLCa, tscapOvariana                                                                                                                                                                                                               |
| <b>PRKCG</b>         | protein kinase C, gamma [Source:HGNC Symbol;Acc:9402] locus=19:54382444-54410906                                      | tcgaBreastMethyl, tcgaColonMethyl, tcgaOvarianMethyl, tscapNSCLCa, tscapOvariana                                                                                                                                                                                                                                      |
| <b>PTK2</b>          | PTK2 protein tyrosine kinase 2 [Source:HGNC Symbol;Acc:9611] locus=8:141667999-142012315                              | snp3dBC, tcgaBreastGE, tcgaBreastMethyl, tcgaColonMethyl, tcgaGliomaGE, tcgaOvarianCGHa, tcgaOvarianGE, tcgaOvarianMethyl, tscapBCd, tscapNSCLCa, tscapOvariana, tscapOvarian                                                                                                                                         |
| <b>RP11-631M21.2</b> | Tubulin beta-8 chain [Source:UniProtKB/Swiss-Prot;Acc:Q3ZCM7] locus=10:92828-96053                                    |                                                                                                                                                                                                                                                                                                                       |
| <b>SLC8A1</b>        | solute carrier family 8 (sodium/calcium exchanger), member 1 [Source:HGNC Symbol;Acc:11068] locus=2:40339286-40838193 | tcgaBreastMethyl, tcgaColonMethyl, tcgaGliomaGE                                                                                                                                                                                                                                                                       |

Continued on next page...

| name          | description                                                                                                                 | studies                                                                                                   |
|---------------|-----------------------------------------------------------------------------------------------------------------------------|-----------------------------------------------------------------------------------------------------------|
| <b>SRC</b>    | v-src sarcoma (Schmidt-Ruppin A-2) viral oncogene homolog (avian) [Source:HGNC Symbol;Acc:11283] locus=20:35973088-36034453 | tcgaBreastGE                                                                                              |
| <b>TLR4</b>   | toll-like receptor 4 [Source:HGNC Symbol;Acc:11850] locus=9:120466610-120479149                                             | fileBC2brain, tcgaBreastGE, tcgaColonMethyl                                                               |
| <b>TUBB</b>   | tubulin, beta [Source:HGNC Symbol;Acc:20778] locus=6:30687978-30693203                                                      | tcgaBreastGE, tcgaColonGE, tcgaOvarianGE, tcgaOvarianMethyl                                               |
| <b>TUBB1</b>  | tubulin, beta 1 [Source:HGNC Symbol;Acc:16257] locus=20:57594309-57601709                                                   | tcgaColonMethyl, tcgaOvarianCGHa                                                                          |
| <b>TUBB2A</b> | tubulin, beta 2A [Source:HGNC Symbol;Acc:12412] locus=6:3153903-3157809                                                     | snp3dLungC, tcgaBreastGE, tcgaColonMethyl, tcgaOvarianMethyl, tscapeOvariana, tscapeSCLCd                 |
| <b>TUBB2B</b> | tubulin, beta 2B [Source:HGNC Symbol;Acc:30829] locus=6:3224517-3231964                                                     | tcgaBreastGE, tcgaBreastMethyl, tcgaColonGE, tcgaGliomaGE, tcgaOvarianMethyl, tscapeOvariana, tscapeSCLCd |
| <b>TUBB2C</b> | tubulin, beta 2C [Source:HGNC Symbol;Acc:20771] locus=9:140135665-140138159                                                 | tcgaBreastGE, tcgaBreastMethyl, tcgaColonMethyl, tcgaOvarianMethyl, tscapeCRCa                            |
| <b>TUBB3</b>  | tubulin, beta 3 [Source:HGNC Symbol;Acc:20772] locus=16:89987800-90005169                                                   | tcgaColonGE, tcgaColonMethyl, tcgaGliomaGE, tcgaOvarianMethyl, tscapeCRCd, tscapeNSCLCd, tscapeProstated  |
| <b>TUBB4</b>  | tubulin, beta 4 [Source:HGNC Symbol;Acc:20774] locus=19:6494331-6502330                                                     | tcgaBreastMethyl, tcgaColonGE, tcgaGliomaGE, tscapeHCCd, tscapeRCCd                                       |
| <b>TUBB4Q</b> | tubulin, beta polypeptide 4, member Q, pseudogene [Source:HGNC Symbol;Acc:12413] locus=4:190903678-190906026                | tcgaBreastGE, tscapeBCd, tscapeHCCd, tscapeMelanomad, tscapeNSCLCd, tscapeProstated, tscapeRCCd           |
| <b>TUBB6</b>  | tubulin, beta 6 [Source:HGNC Symbol;Acc:20776] locus=18:12308070-12326568                                                   | tcgaBreastGE, tcgaBreastMethyl, tcgaColonMethyl, tcgaGliomaGE                                             |

Table 3: List of KEGG [8] pathways supporting the relationships between the genes shown in Figure 1. Number of edges taken from each pathway is shown on edges column.

| name                                                       | edges | genes                                                                                                                                                                               |
|------------------------------------------------------------|-------|-------------------------------------------------------------------------------------------------------------------------------------------------------------------------------------|
| Toxoplasmosis                                              | 48    | ITGA6, ITGB1, LAMA1, LAMA2, LAMA3, LAMA4, LAMA5, LAMB1, LAMB2, LAMB3, LAMB4, LAMC1, LAMC2, LAMC3, TLR4                                                                              |
| Phagosome                                                  | 32    | ACTB, ACTG1, DYNC1H1, DYNC1H1, DYNC1H2, DYNC1L1, DYNC1L2, DYNC2H1, ITGAV, ITGB1, RP11-631M21.2, TLR4, TUBA1C, TUBB, TUBB1, TUBB2A, TUBB2B, TUBB2C, TUBB3, TUBB4, TUBB4Q, TUBB6      |
| Gap junction                                               | 22    | GJA1, PRKCA, PRKCB, PRKCG, RP11-631M21.2, SRC, TUBA1C, TUBB, TUBB1, TUBB2A, TUBB2B, TUBB2C, TUBB3, TUBB4, TUBB4Q, TUBB6                                                             |
| Focal adhesion                                             | 21    | ACTB, ACTG1, CAV1, CAV2, CAV3, CTNNB1, ILK, ITGA6, ITGAV, ITGB1, LAMA1, LAMA2, LAMA3, LAMA4, LAMA5, LAMB1, LAMB2, LAMB3, LAMB4, LAMC1, LAMC2, LAMC3, PRKCA, PRKCB, PRKCG, PTK2, SRC |
| Insulin signaling pathway                                  | 14    | FASN, INSR, IRS1, IRS2, IRS4, PTPRF                                                                                                                                                 |
| Vibrio cholerae infection                                  | 12    | ACTB, ACTG1, PRKCA, PRKCB, PRKCG                                                                                                                                                    |
| Pathogenic Escherichia coli infection                      | 11    | ACTB, ACTG1, ARHGEF2, CTNNB1, ITGB1, PRKCA, RP11-631M21.2, TLR4, TUBA1C, TUBB, TUBB1, TUBB2A, TUBB2B, TUBB2C, TUBB3, TUBB4, TUBB4Q, TUBB6                                           |
| Tight junction                                             | 6     | ACTB, ACTG1, CTNNB1, PRKCA, PRKCB, PRKCG, SRC                                                                                                                                       |
| Hypertrophic cardiomyopathy (HCM)                          | 4     | ACTB, ACTG1, ITGA6, ITGAV, ITGB1, LAMA2, SLC8A1                                                                                                                                     |
| Adherens junction                                          | 4     | ACTB, ACTG1, CTNNB1, INSR, PTPRF, SRC                                                                                                                                               |
| Aldosterone-regulated sodium reabsorption                  | 3     | ATP1B3, INSR, IRS1, IRS2, IRS4, PRKCA, PRKCB, PRKCG                                                                                                                                 |
| Type II diabetes mellitus                                  | 3     | INSR, IRS1, IRS2, IRS4                                                                                                                                                              |
| Regulation of actin cytoskeleton                           | 3     | ACTB, ACTG1, ITGA6, ITGAV, ITGB1, PTK2, SRC                                                                                                                                         |
| Bacterial invasion of epithelial cells                     | 2     | ACTB, ACTG1, CAV1, CAV2, CAV3, CTNNB1, ILK, ITGB1, PTK2, SRC                                                                                                                        |
| Chemokine signaling pathway                                | 2     | PRKCB, PTK2, SRC                                                                                                                                                                    |
| ErbB signaling pathway                                     | 2     | HBEGF, PRKCA, PRKCB, PRKCG, PTK2, SRC                                                                                                                                               |
| Tuberculosis                                               | 1     | HSPD1, SRC, TLR4                                                                                                                                                                    |
| Epithelial cell signaling in Helicobacter pylori infection | 1     | ADAM10, HBEGF, SRC                                                                                                                                                                  |
| Endocrine and other factor-regulated calcium reabsorption  | 1     | ATP1B3, PRKCA, PRKCB, PRKCG, SLC8A1                                                                                                                                                 |

### 1.1.1 GO enrichment of the candidate pathway

Table 4: Enriched Gene Ontology terms [1] (FDR corrected  $p \leq 0.01$ ). Ratio is the proportion of the annotated genes among the whole gene set. List is sorted based on the FDR corrected p-values. Green and blue borders are referring to up and down regulated genes, respectively.

| Ratio | Type | Description                                           | Genes                                                                                                                                                                                                                                                                                                                                                                      |
|-------|------|-------------------------------------------------------|----------------------------------------------------------------------------------------------------------------------------------------------------------------------------------------------------------------------------------------------------------------------------------------------------------------------------------------------------------------------------|
| 0.525 | BP   | cellular component assembly at cellular level         | ACTB, ACTG1, CAV1, CAV2, CAV3, CTNNB1, DYNC1H1, DYNC2H1, GJA1, HSPD1, ILK, <b>ITGA6</b> , ITGB1, LAMA3, LAMA5, LAMB3, LAMC1, LAMC2, PRKCA, PTK2, RP11-631M21.2, SRC, <b>TUBA1C</b> , TUBB, TUBB1, TUBB2A, TUBB2B, TUBB2C, TUBB3, TUBB4, TUBB6                                                                                                                              |
| 0.750 | CC   | protein complex                                       | ACTB, ACTG1, ARHGEF2, <b>ATP1B3</b> , CAV1, CAV2, CAV3, CTNNB1, DYNC1H1, DYNC1I1, DYNC1I2, DYNC1L1, DYNC1L2, DYNC2H1, GJA1, HSPD1, ILK, INSR, IRS1, <b>ITGA6</b> , ITGAV, ITGB1, LAMA1, LAMA2, LAMA3, LAMA4, LAMA5, LAMB1, LAMB2, LAMC1, LAMC2, <b>NME1</b> , PRKCA, RP11-631M21.2, SLC8A1, TLR4, <b>TUBA1C</b> , TUBB, TUBB1, TUBB2A, TUBB2B, TUBB2C, TUBB3, TUBB4, TUBB6 |
| 0.424 | MF   | structural molecule activity                          | ACTB, ACTG1, CAV1, CAV3, CTNNB1, LAMA1, LAMA2, LAMA3, LAMA4, LAMA5, LAMB1, LAMB2, LAMB3, LAMC1, LAMC3, RP11-631M21.2, <b>TUBA1C</b> , TUBB, TUBB1, TUBB2A, TUBB2B, TUBB2C, TUBB3, TUBB4, TUBB6                                                                                                                                                                             |
| 0.233 | CC   | basement membrane                                     | <b>ITGA6</b> , ITGB1, LAMA1, LAMA2, LAMA3, LAMA4, LAMA5, LAMB1, LAMB2, LAMB3, LAMB4, LAMC1, LAMC2, LAMC3                                                                                                                                                                                                                                                                   |
| 0.458 | BP   | cellular component movement                           | ACTB, ACTG1, <b>ADAM10</b> , <b>ATP1B3</b> , CAV1, GJA1, HBEGF, ILK, INSR, IRS1, IRS2, <b>ITGA6</b> , ITGAV, ITGB1, LAMA1, LAMA2, LAMA3, LAMA4, LAMA5, LAMB1, LAMC1, PRKCA, PTK2, SRC, TUBB, TUBB2B, TUBB2C                                                                                                                                                                |
| 0.150 | CC   | laminin complex                                       | LAMA1, LAMA2, LAMA3, LAMA4, LAMA5, LAMB1, LAMB2, LAMC1, LAMC2                                                                                                                                                                                                                                                                                                              |
| 0.339 | BP   | microtubule-based process                             | ARHGEF2, CAV1, CAV3, CTNNB1, DYNC1H1, DYNC1I1, DYNC1I2, DYNC1L1, DYNC2H1, PTK2, RP11-631M21.2, <b>TUBA1C</b> , TUBB, TUBB1, TUBB2A, TUBB2B, TUBB2C, TUBB3, TUBB4, TUBB6                                                                                                                                                                                                    |
| 0.300 | CC   | microtubule                                           | ARHGEF2, DYNC1H1, DYNC1I1, DYNC1I2, DYNC1L1, DYNC1L2, DYNC2H1, RP11-631M21.2, SLC8A1, <b>TUBA1C</b> , TUBB, TUBB1, TUBB2A, TUBB2B, TUBB2C, TUBB3, TUBB4, TUBB6                                                                                                                                                                                                             |
| 0.237 | BP   | microtubule-based movement                            | DYNC1H1, DYNC1I1, DYNC1I2, DYNC2H1, RP11-631M21.2, <b>TUBA1C</b> , TUBB, TUBB1, TUBB2A, TUBB2B, TUBB2C, TUBB3, TUBB4, TUBB6                                                                                                                                                                                                                                                |
| 0.390 | BP   | cell migration                                        | <b>ADAM10</b> , <b>ATP1B3</b> , CAV1, GJA1, HBEGF, ILK, INSR, IRS1, IRS2, <b>ITGA6</b> , ITGAV, ITGB1, LAMA1, LAMA2, LAMA3, LAMA4, LAMA5, LAMB1, LAMC1, PRKCA, PTK2, SRC, TUBB2B                                                                                                                                                                                           |
| 0.271 | MF   | protein complex binding                               | <b>ADAM10</b> , CAV3, ILK, INSR, IRS1, IRS2, IRS4, <b>ITGA6</b> , ITGB1, LAMA5, LAMB1, LAMB2, LAMB3, <b>PTPRF</b> , SRC, TUBB                                                                                                                                                                                                                                              |
| 0.424 | MF   | receptor binding                                      | <b>ADAM10</b> , CAV1, CAV2, CTNNB1, GJA1, HBEGF, ILK, INSR, IRS1, IRS2, IRS4, <b>ITGA6</b> , ITGB1, LAMA1, LAMA2, LAMA3, LAMA4, LAMA5, LAMB1, LAMB2, PRKCB, <b>PTPRF</b> , SRC, TUBB, TUBB2C                                                                                                                                                                               |
| 0.117 | CC   | laminin-1 complex                                     | LAMA1, LAMA2, LAMA3, LAMA4, LAMA5, LAMB1, LAMC1                                                                                                                                                                                                                                                                                                                            |
| 0.356 | BP   | protein complex assembly                              | CAV1, CAV2, CAV3, GJA1, HSPD1, ILK, INSR, IRS1, LAMC1, PTK2, RP11-631M21.2, SRC, <b>TUBA1C</b> , TUBB, TUBB1, TUBB2A, TUBB2B, TUBB2C, TUBB3, TUBB4, TUBB6                                                                                                                                                                                                                  |
| 0.678 | BP   | system development                                    | ACTB, ACTG1, ARHGEF2, CAV1, CAV2, CAV3, CTNNB1, DYNC2H1, GJA1, HBEGF, HSPD1, ILK, INSR, IRS1, IRS2, <b>ITGA6</b> , ITGAV, ITGB1, LAMA1, LAMA2, LAMA3, LAMA4, LAMA5, LAMB1, LAMB2, LAMB3, LAMC1, LAMC2, LAMC3, <b>NME1</b> , PRKCA, PTK2, <b>PTPRF</b> , SLC8A1, SRC, TLR4, TUBB, TUBB2A, TUBB2B, TUBB3                                                                     |
| 0.220 | BP   | cell junction assembly                                | ACTB, ACTG1, CTNNB1, GJA1, ILK, <b>ITGA6</b> , ITGB1, LAMA3, LAMA5, LAMB3, LAMC1, LAMC2, SRC                                                                                                                                                                                                                                                                               |
| 0.169 | BP   | 'de novo' protein folding                             | ACTB, HSPD1, <b>TUBA1C</b> , TUBB1, TUBB2A, TUBB2B, TUBB2C, TUBB3, TUBB4, TUBB6                                                                                                                                                                                                                                                                                            |
| 0.254 | BP   | cellular protein complex assembly                     | CAV1, CAV3, HSPD1, PTK2, RP11-631M21.2, SRC, <b>TUBA1C</b> , TUBB, TUBB1, TUBB2A, TUBB2B, TUBB2C, TUBB3, TUBB4, TUBB6                                                                                                                                                                                                                                                      |
| 0.203 | BP   | protein polymerization                                | CAV1, CAV3, RP11-631M21.2, <b>TUBA1C</b> , TUBB, TUBB1, TUBB2A, TUBB2B, TUBB2C, TUBB3, TUBB4, TUBB6                                                                                                                                                                                                                                                                        |
| 0.254 | BP   | regulation of cell migration                          | <b>ADAM10</b> , HBEGF, ILK, INSR, IRS1, IRS2, ITGAV, ITGB1, LAMA1, LAMA2, LAMA3, LAMA4, LAMA5, LAMB1, PRKCA                                                                                                                                                                                                                                                                |
| 0.153 | BP   | 'de novo' posttranslational protein folding           | ACTB, <b>TUBA1C</b> , TUBB1, TUBB2A, TUBB2B, TUBB2C, TUBB3, TUBB4, TUBB6                                                                                                                                                                                                                                                                                                   |
| 0.356 | BP   | cellular component morphogenesis                      | ACTB, ACTG1, ARHGEF2, CAV3, CTNNB1, DYNC2H1, GJA1, ILK, ITGAV, ITGB1, LAMA1, LAMA5, LAMB1, LAMB2, LAMC1, LAMC3, PRKCA, PTK2, <b>PTPRF</b> , SRC, TUBB3                                                                                                                                                                                                                     |
| 0.339 | BP   | cell morphogenesis                                    | ACTB, ACTG1, ARHGEF2, CTNNB1, DYNC2H1, GJA1, ILK, ITGAV, ITGB1, LAMA1, LAMA5, LAMB1, LAMB2, LAMC1, LAMC3, PRKCA, PTK2, <b>PTPRF</b> , SRC, TUBB3                                                                                                                                                                                                                           |
| 0.183 | CC   | membrane raft                                         | <b>ATP1B3</b> , CAV1, CAV2, CAV3, GJA1, INSR, IRS1, ITGB1, PRKCA, SRC, TLR4                                                                                                                                                                                                                                                                                                |
| 0.339 | BP   | cell adhesion                                         | <b>ADAM10</b> , CTNNB1, ILK, <b>ITGA6</b> , ITGAV, ITGB1, LAMA1, LAMA2, LAMA3, LAMA4, LAMA5, LAMB1, LAMB2, LAMB3, LAMB4, LAMC1, LAMC2, LAMC3, PTK2, <b>PTPRF</b>                                                                                                                                                                                                           |
| 0.288 | BP   | cell projection morphogenesis                         | ACTB, ACTG1, DYNC2H1, GJA1, ILK, ITGAV, ITGB1, LAMA1, LAMA5, LAMB1, LAMB2, LAMC1, PRKCA, PTK2, <b>PTPRF</b> , SRC, TUBB3                                                                                                                                                                                                                                                   |
| 0.305 | MF   | nucleoside-triphosphatase activity                    | <b>ATP1B3</b> , DYNC1H1, DYNC1I1, DYNC1I2, DYNC1L1, DYNC1L2, DYNC2H1, HSPD1, RP11-631M21.2, <b>TUBA1C</b> , TUBB, TUBB1, TUBB2A, TUBB2B, TUBB2C, TUBB3, TUBB4, TUBB6                                                                                                                                                                                                       |
| 0.356 | BP   | neurogenesis                                          | ACTB, ACTG1, ARHGEF2, CTNNB1, GJA1, ILK, ITGAV, ITGB1, LAMA1, LAMB1, LAMB2, LAMC1, LAMC3, PRKCA, PTK2, <b>PTPRF</b> , SRC, TUBB, TUBB2A, TUBB2B, TUBB3                                                                                                                                                                                                                     |
| 0.288 | BP   | cell morphogenesis involved in differentiation        | ACTB, ACTG1, CTNNB1, ILK, ITGAV, ITGB1, LAMA1, LAMA5, LAMB1, LAMB2, LAMC1, LAMC3, PRKCA, PTK2, <b>PTPRF</b> , SRC, TUBB3                                                                                                                                                                                                                                                   |
| 0.186 | BP   | regulation of cell adhesion                           | <b>ADAM10</b> , ILK, <b>ITGA6</b> , ITGAV, ITGB1, LAMA1, LAMA2, LAMA3, LAMA4, LAMA5, PTK2                                                                                                                                                                                                                                                                                  |
| 0.339 | BP   | generation of neurons                                 | ACTB, ACTG1, ARHGEF2, CTNNB1, GJA1, ILK, ITGAV, ITGB1, LAMA1, LAMB1, LAMB2, LAMC1, PRKCA, PTK2, <b>PTPRF</b> , SRC, TUBB, TUBB2A, TUBB2B, TUBB3                                                                                                                                                                                                                            |
| 0.136 | MF   | integrin binding                                      | <b>ADAM10</b> , ILK, <b>ITGA6</b> , ITGB1, LAMA5, LAMB1, LAMB2, SRC                                                                                                                                                                                                                                                                                                        |
| 0.424 | MF   | purine ribonucleoside triphosphate binding            | ACTB, ACTG1, DYNC1H1, DYNC1L1, DYNC1L2, DYNC2H1, HSPD1, ILK, INSR, <b>NME1</b> , PRKCA, PRKCB, PRKCG, PTK2, RP11-631M21.2, SRC, <b>TUBA1C</b> , TUBB, TUBB1, TUBB2A, TUBB2B, TUBB2C, TUBB3, TUBB4, TUBB6                                                                                                                                                                   |
| 0.339 | BP   | regulation of cell proliferation                      | <b>ADAM10</b> , ARHGEF2, CAV1, CAV2, CTNNB1, GJA1, HBEGF, ILK, INSR, IRS1, IRS2, ITGAV, ITGB1, LAMA5, LAMB1, LAMC1, <b>NME1</b> , PRKCA, <b>PTPRF</b> , TLR4                                                                                                                                                                                                               |
| 0.271 | BP   | wound healing                                         | ACTB, ACTG1, <b>ATP1B3</b> , CAV1, GJA1, HBEGF, <b>ITGA6</b> , ITGAV, ITGB1, PRKCA, PRKCB, PRKCG, PTK2, SLC8A1, SRC, TLR4                                                                                                                                                                                                                                                  |
| 0.203 | MF   | kinase binding                                        | ACTB, ACTG1, <b>ADAM10</b> , CAV1, CTNNB1, INSR, IRS1, IRS2, ITGB1, PRKCB, PTK2, TLR4                                                                                                                                                                                                                                                                                      |
| 0.117 | CC   | caveola                                               | <b>ATP1B3</b> , CAV1, CAV2, CAV3, INSR, IRS1, SRC                                                                                                                                                                                                                                                                                                                          |
| 0.169 | BP   | positive regulation of cell migration                 | <b>ADAM10</b> , HBEGF, ILK, INSR, IRS1, IRS2, ITGAV, ITGB1, LAMB1, PRKCA                                                                                                                                                                                                                                                                                                   |
| 0.119 | BP   | regulation of embryonic development                   | CTNNB1, INSR, LAMA1, LAMA2, LAMA3, LAMA4, LAMA5                                                                                                                                                                                                                                                                                                                            |
| 0.254 | BP   | neuron projection morphogenesis                       | ACTB, ACTG1, GJA1, ILK, ITGAV, ITGB1, LAMA1, LAMB1, LAMB2, LAMC1, PRKCA, PTK2, <b>PTPRF</b> , SRC, TUBB3                                                                                                                                                                                                                                                                   |
| 0.085 | BP   | hemidesmosome assembly                                | <b>ITGA6</b> , LAMA3, LAMB3, LAMC1, LAMC2                                                                                                                                                                                                                                                                                                                                  |
| 0.100 | CC   | dynein complex                                        | DYNC1H1, DYNC1I1, DYNC1I2, DYNC1L1, DYNC1L2, DYNC2H1                                                                                                                                                                                                                                                                                                                       |
| 0.203 | MF   | GTP binding                                           | INSR, <b>NME1</b> , RP11-631M21.2, <b>TUBA1C</b> , TUBB, TUBB1, TUBB2A, TUBB2B, TUBB2C, TUBB3, TUBB4, TUBB6                                                                                                                                                                                                                                                                |
| 0.237 | BP   | blood coagulation                                     | ACTB, ACTG1, <b>ATP1B3</b> , CAV1, <b>ITGA6</b> , ITGAV, ITGB1, PRKCA, PRKCB, PRKCG, PTK2, SLC8A1, SRC, TLR4                                                                                                                                                                                                                                                               |
| 0.119 | BP   | integrin-mediated signaling pathway                   | <b>ADAM10</b> , ILK, <b>ITGA6</b> , ITGAV, ITGB1, LAMA5, PTK2                                                                                                                                                                                                                                                                                                              |
| 0.237 | BP   | cell morphogenesis involved in neuron differentiation | ACTB, ACTG1, ILK, ITGAV, ITGB1, LAMA1, LAMB1, LAMB2, LAMC1, PRKCA, PTK2, <b>PTPRF</b> , SRC, TUBB3                                                                                                                                                                                                                                                                         |
| 0.237 | BP   | positive regulation of cell proliferation             | <b>ADAM10</b> , CTNNB1, HBEGF, ILK, INSR, IRS1, IRS2, ITGAV, ITGB1, LAMB1, LAMC1, <b>NME1</b> , PRKCA, TLR4                                                                                                                                                                                                                                                                |
| 0.203 | BP   | muscle structure development                          | ACTG1, CAV1, CAV2, CAV3, CTNNB1, GJA1, HBEGF, ILK, ITGB1, LAMA2, LAMA5, LAMB2                                                                                                                                                                                                                                                                                              |
| 0.169 | MF   | GTPase activity                                       | RP11-631M21.2, <b>TUBA1C</b> , TUBB, TUBB1, TUBB2A, TUBB2B, TUBB2C, TUBB3, TUBB4, TUBB6                                                                                                                                                                                                                                                                                    |
| 0.169 | MF   | protein kinase binding                                | ACTB, ACTG1, <b>ADAM10</b> , CTNNB1, INSR, IRS1, IRS2, ITGB1, PRKCB, PTK2                                                                                                                                                                                                                                                                                                  |
| 0.220 | BP   | axonogenesis                                          | ACTB, ACTG1, ILK, ITGAV, ITGB1, LAMA1, LAMB1, LAMB2, LAMC1, PRKCA, PTK2, SRC, TUBB3                                                                                                                                                                                                                                                                                        |
| 0.441 | BP   | organ development                                     | CAV1, CAV2, CAV3, CTNNB1, DYNC2H1, GJA1, HBEGF, ILK, INSR, IRS1, IRS2, <b>ITGA6</b> , ITGB1, LAMA2, LAMA3, LAMA5, LAMB1, LAMB2, LAMB3, LAMC2, LAMC3, <b>NME1</b> , PRKCA, SLC8A1, SRC, TLR4                                                                                                                                                                                |
| 0.067 | CC   | cytoplasmic dynein complex                            | DYNC1H1, DYNC1I1, DYNC1L1, DYNC1L2                                                                                                                                                                                                                                                                                                                                         |
| 0.400 | CC   | cytosol                                               | ACTB, ACTG1, ARHGEF2, CAV1, CAV2, CTNNB1, DYNC1H1, DYNC1I2, FASN, GJA1, HSPD1, ILK, INSR, IRS1, IRS2, <b>NME1</b> , PRKCA, PRKCB, PRKCG, PTK2, SRC, TUBB, TUBB2A, TUBB2B, TUBB2C, TUBB3, TUBB4, TUBB6                                                                                                                                                                      |
| 0.153 | BP   | microtubule cytoskeleton organization                 | ARHGEF2, CAV1, CAV3, CTNNB1, DYNC1H1, DYNC1L1, PTK2, TUBB, TUBB1                                                                                                                                                                                                                                                                                                           |
| 0.271 | BP   | positive regulation of response to stimulus           | <b>ADAM10</b> , <b>BST2</b> , CAV1, CAV2, CTNNB1, GJA1, HBEGF, HSPD1, ILK, INSR, IRS1, ITGB1, PRKCA, PRKCB, PRKCG, TLR4                                                                                                                                                                                                                                                    |
| 0.271 | BP   | regulation of cellular component organization         | <b>ADAM10</b> , ARHGEF2, CAV1, CAV2, CAV3, CTNNB1, DYNC1L1, HBEGF, ILK, INSR, ITGAV, ITGB1, PRKCA, PTK2, <b>PTPRF</b> , SRC                                                                                                                                                                                                                                                |
| 0.136 | BP   | cell-substrate adhesion                               | CTNNB1, ILK, <b>ITGA6</b> , ITGAV, ITGB1, LAMA5, LAMB1, LAMC1                                                                                                                                                                                                                                                                                                              |
| 0.271 | BP   | cell cycle process                                    | ARHGEF2, CAV2, CTNNB1, DYNC1H1, DYNC1I2, DYNC1L1, ILK, INSR, ITGB1, TUBB, TUBB1, TUBB2A, TUBB2B, TUBB2C, TUBB3, TUBB4                                                                                                                                                                                                                                                      |
| 0.050 | CC   | laminin-10 complex                                    | LAMA5, LAMB1, LAMC1                                                                                                                                                                                                                                                                                                                                                        |
| 0.050 | CC   | laminin-11 complex                                    | LAMA5, LAMB2, LAMC1                                                                                                                                                                                                                                                                                                                                                        |
| 0.237 | BP   | intracellular protein kinase cascade                  | <b>BST2</b> , CAV1, CAV3, CTNNB1, GJA1, HBEGF, ILK, INSR, ITGAV, ITGB1, PRKCB, SRC, TLR4                                                                                                                                                                                                                                                                                   |
| 0.220 | BP   | purine ribonucleoside triphosphate metabolic process  | <b>ATP1B3</b> , HSPD1, <b>NME1</b> , RP11-631M21.2, <b>TUBA1C</b> , TUBB, TUBB1, TUBB2A, TUBB2B, TUBB2C, TUBB3, TUBB4, TUBB6                                                                                                                                                                                                                                               |
| 0.186 | BP   | regulation of intracellular protein kinase cascade    | <b>BST2</b> , CAV1, CAV3, CTNNB1, GJA1, HBEGF, ILK, INSR, ITGB1, PRKCB, TLR4                                                                                                                                                                                                                                                                                               |
| 0.117 | CC   | receptor complex                                      | HSPD1, INSR, IRS1, <b>ITGA6</b> , ITGAV, ITGB1, TLR4                                                                                                                                                                                                                                                                                                                       |

Continued on next page...

| Ratio | Type | Description                                                      | Genes                                                                                                                                                                                     |
|-------|------|------------------------------------------------------------------|-------------------------------------------------------------------------------------------------------------------------------------------------------------------------------------------|
| 0.169 | BP   | axon guidance                                                    | ACTB, ACTG1, ITGAV, ITGB1, LAMA1, LAMB1, LAMC1, PTK2, SRC, TUBB3                                                                                                                          |
| 0.068 | MF   | phosphatidylinositol 3-kinase binding                            | INSR, IRS1, IRS2, TLR4                                                                                                                                                                    |
| 0.119 | BP   | peptidyl-tyrosine phosphorylation                                | CAV1, INSR, ITGB1, PRKCA, PTK2, SRC, TLR4                                                                                                                                                 |
| 0.203 | BP   | positive regulation of signal transduction                       | <b>BST2</b> , CAV1, CAV2, CTNNB1, GJA1, HBEGF, ILK, INSR, IRS1, ITGB1, PRKCB, TLR4                                                                                                        |
| 0.068 | BP   | substrate adhesion-dependent cell spreading                      | ILK, LAMA5, LAMB1, LAMC1                                                                                                                                                                  |
| 0.153 | BP   | muscle organ development                                         | CAV1, CAV2, CAV3, GJA1, HBEGF, ILK, LAMA2, LAMA5, LAMB2                                                                                                                                   |
| 0.237 | BP   | cell cycle phase                                                 | ARHGEF2, CAV2, DYNC1H1, DYNC1L1, INSR, ITGB1, TUBB, TUBB1, TUBB2A, TUBB2B, TUBB2C, TUBB3, TUBB4                                                                                           |
| 0.136 | BP   | leukocyte migration                                              | <b>ADAM10</b> , <b>ATP1B3</b> , CAV1, <b>ITGA6</b> , ITGAV, ITGB1, PRKCA, SRC                                                                                                             |
| 0.237 | BP   | enzyme linked receptor protein signaling pathway                 | <b>ADAM10</b> , ARHGEF2, CAV1, CTNNB1, HBEGF, ILK, INSR, IRS1, IRS2, PRKCA, PRKCG, PTK2, <b>PTPRF</b> , SRC                                                                               |
| 0.169 | BP   | positive regulation of cellular component organization           | CAV1, CAV3, CTNNB1, ILK, INSR, ITGAV, ITGB1, PRKCA, <b>PTPRF</b> , SRC                                                                                                                    |
| 0.250 | CC   | cell projection                                                  | ACTB, ACTG1, ARHGEF2, CAV1, CTNNB1, DYNC2H1, ILK, <b>ITGA6</b> , ITGB1, PRKCA, PRKCG, PTK2, <b>PTPRF</b> , SLC8A1, TUBB4                                                                  |
| 0.102 | BP   | cellular component assembly involved in morphogenesis            | ACTG1, CAV3, DYNC2H1, ILK, ITGB1, LAMA5                                                                                                                                                   |
| 0.153 | BP   | positive regulation of intracellular protein kinase cascade      | <b>BST2</b> , CTNNB1, GJA1, HBEGF, ILK, INSR, ITGB1, PRKCB, TLR4                                                                                                                          |
| 0.186 | BP   | GTP metabolic process                                            | <b>NME1</b> , RP11-631M21.2, <b>TUBA1C</b> , TUBB, TUBB1, TUBB2A, TUBB2B, TUBB2C, TUBB3, TUBB4, TUBB6                                                                                     |
| 0.167 | CC   | cell surface                                                     | <b>ADAM10</b> , CAV1, CAV2, CAV3, HBEGF, HSPD1, <b>ITGA6</b> , ITGAV, ITGB1, TLR4                                                                                                         |
| 0.220 | BP   | mitotic cell cycle                                               | ARHGEF2, CAV2, DYNC1H1, DYNC1I2, DYNC1L1, INSR, ITGB1, TUBB, TUBB2A, TUBB2B, TUBB2C, TUBB3, TUBB4                                                                                         |
| 0.117 | CC   | adherens junction                                                | CAV1, CTNNB1, GJA1, ILK, <b>ITGA6</b> , ITGB1, PTK2                                                                                                                                       |
| 0.203 | BP   | transmembrane receptor protein tyrosine kinase signaling pathway | <b>ADAM10</b> , ARHGEF2, CTNNB1, HBEGF, INSR, IRS1, IRS2, PRKCA, PRKCG, PTK2, <b>PTPRF</b> , SRC                                                                                          |
| 0.233 | CC   | membrane fraction                                                | CAV1, CAV2, CAV3, CTNNB1, GJA1, INSR, IRS1, IRS2, ITGB1, LAMB2, LAMC2, PRKCA, PRKCG, <b>PTPRF</b>                                                                                         |
| 0.220 | BP   | cell activation                                                  | <b>ADAM10</b> , <b>BST2</b> , CAV1, CTNNB1, HSPD1, IRS2, ITGB1, PRKCA, PRKCB, PRKCG, SLC8A1, SRC, TLR4                                                                                    |
| 0.102 | BP   | striated muscle cell development                                 | ACTG1, CAV2, CAV3, ILK, ITGB1, LAMB2                                                                                                                                                      |
| 0.136 | BP   | positive regulation of phosphorylation                           | CAV1, ILK, INSR, IRS1, <b>ITGA6</b> , ITGB1, PRKCA, TLR4                                                                                                                                  |
| 0.085 | BP   | regulation of microtubule cytoskeleton organization              | ARHGEF2, CAV1, CAV3, CTNNB1, DYNC1L1                                                                                                                                                      |
| 0.051 | MF   | nitric-oxide synthase binding                                    | ACTB, CAV1, CAV3                                                                                                                                                                          |
| 0.068 | MF   | SH2 domain binding                                               | INSR, IRS1, PTK2, SRC                                                                                                                                                                     |
| 0.068 | MF   | insulin receptor binding                                         | IRS1, IRS2, IRS4, <b>PTPRF</b>                                                                                                                                                            |
| 0.051 | BP   | membrane raft organization                                       | CAV1, CAV2, CAV3                                                                                                                                                                          |
| 0.305 | BP   | apoptosis                                                        | ARHGEF2, CAV1, CTNNB1, GJA1, HSPD1, ILK, IRS2, <b>ITGA6</b> , ITGAV, ITGB1, <b>NME1</b> , PRKCA, PRKCB, PTK2, <b>PTPRF</b> , TLR4, TUBB, TUBB2C                                           |
| 0.102 | MF   | motor activity                                                   | DYNC1H1, DYNC1I1, DYNC1I2, DYNC1L1, DYNC1L2, DYNC2H1                                                                                                                                      |
| 0.186 | BP   | purine ribonucleoside triphosphate catabolic process             | HSPD1, RP11-631M21.2, <b>TUBA1C</b> , TUBB, TUBB1, TUBB2A, TUBB2C, TUBB3, TUBB4, TUBB6                                                                                                    |
| 0.305 | BP   | response to organic substance                                    | <b>ADAM10</b> , CAV1, CTNNB1, GJA1, HSPD1, INSR, IRS1, IRS2, <b>ITGA6</b> , ITGB1, <b>NME1</b> , PRKCA, PRKCB, PTK2, <b>PTPRF</b> , SLC8A1, SRC, TLR4                                     |
| 0.186 | BP   | ribonucleoside triphosphate catabolic process                    | HSPD1, RP11-631M21.2, <b>TUBA1C</b> , TUBB, TUBB1, TUBB2A, TUBB2B, TUBB2C, TUBB3, TUBB4, TUBB6                                                                                            |
| 0.102 | BP   | cell-matrix adhesion                                             | CTNNB1, ILK, <b>ITGA6</b> , ITGAV, ITGB1, LAMA5                                                                                                                                           |
| 0.153 | BP   | interspecies interaction between organisms                       | CAV1, DYNC1I2, DYNC1L1, HSPD1, INSR, ITGAV, ITGB1, SRC, TLR4                                                                                                                              |
| 0.169 | BP   | GTP catabolic process                                            | RP11-631M21.2, <b>TUBA1C</b> , TUBB, TUBB1, TUBB2A, TUBB2C, TUBB3, TUBB4, TUBB6                                                                                                           |
| 0.068 | BP   | regulation of glucose import                                     | INSR, IRS1, IRS2, PRKCA                                                                                                                                                                   |
| 0.169 | BP   | M phase                                                          | ARHGEF2, CAV2, DYNC1H1, DYNC1L1, INSR, TUBB, TUBB1, TUBB2A, TUBB2B, TUBB3                                                                                                                 |
| 0.169 | BP   | leukocyte activation                                             | <b>ADAM10</b> , <b>BST2</b> , CAV1, CTNNB1, HSPD1, IRS2, ITGB1, PRKCB, SRC, TLR4                                                                                                          |
| 0.167 | CC   | neuron projection                                                | ACTB, ACTG1, ARHGEF2, CTNNB1, ILK, PRKCA, PRKCG, <b>PTPRF</b> , SLC8A1, TUBB4                                                                                                             |
| 0.051 | BP   | positive regulation of glycogen biosynthetic process             | INSR, IRS1, IRS2                                                                                                                                                                          |
| 0.254 | BP   | regulation of apoptosis                                          | ARHGEF2, CAV1, CTNNB1, HSPD1, ILK, IRS2, <b>ITGA6</b> , ITGAV, ITGB1, <b>NME1</b> , PRKCA, <b>PTPRF</b> , TLR4, TUBB, TUBB2C                                                              |
| 0.051 | MF   | protein kinase C activity                                        | PRKCA, PRKCB, PRKCG                                                                                                                                                                       |
| 0.153 | BP   | MAPKKK cascade                                                   | CAV1, CAV3, CTNNB1, ILK, INSR, ITGAV, ITGB1, PRKCA, TLR4                                                                                                                                  |
| 0.119 | BP   | nerve growth factor receptor signaling pathway                   | ARHGEF2, IRS1, IRS2, PRKCA, PRKCG, <b>PTPRF</b> , SRC                                                                                                                                     |
| 0.390 | BP   | negative regulation of cellular process                          | <b>ADAM10</b> , ARHGEF2, CAV1, CAV2, CAV3, CTNNB1, DYNC1L1, GJA1, HBEGF, HSPD1, ILK, INSR, IRS1, IRS2, <b>ITGA6</b> , ITGAV, ITGB1, <b>NME1</b> , PRKCA, PRKCG, PTK2, <b>PTPRF</b> , TLR4 |
| 0.153 | BP   | lymphocyte activation                                            | <b>BST2</b> , CAV1, CTNNB1, HSPD1, IRS2, ITGB1, PRKCB, SRC, TLR4                                                                                                                          |
| 0.119 | BP   | regulation of MAPKKK cascade                                     | CAV1, CAV3, CTNNB1, ILK, INSR, ITGB1, TLR4                                                                                                                                                |
| 0.102 | BP   | B cell activation                                                | <b>BST2</b> , HSPD1, IRS2, ITGB1, PRKCB, TLR4                                                                                                                                             |
| 0.085 | BP   | fibroblast growth factor receptor signaling pathway              | CTNNB1, INSR, IRS1, IRS2, SRC                                                                                                                                                             |
| 0.051 | BP   | sarcomere organization                                           | ACTG1, CAV3, ITGB1                                                                                                                                                                        |
| 0.136 | BP   | mitosis                                                          | ARHGEF2, CAV2, DYNC1L1, INSR, TUBB, TUBB2A, TUBB2B, TUBB3                                                                                                                                 |
| 0.136 | BP   | nuclear division                                                 | ARHGEF2, CAV2, DYNC1L1, INSR, TUBB, TUBB2A, TUBB2B, TUBB3                                                                                                                                 |
| 0.083 | CC   | cell-substrate adherens junction                                 | CAV1, CTNNB1, ILK, ITGB1, PTK2                                                                                                                                                            |
| 0.085 | BP   | cell-cell junction organization                                  | ACTB, ACTG1, CTNNB1, GJA1, ITGB1                                                                                                                                                          |
| 0.169 | BP   | positive regulation of apoptosis                                 | ARHGEF2, CTNNB1, HSPD1, <b>ITGA6</b> , ITGB1, PRKCA, <b>PTPRF</b> , TLR4, TUBB, TUBB2C                                                                                                    |
| 0.102 | BP   | regulation of epithelial cell proliferation                      | CAV1, CAV2, CTNNB1, LAMB1, LAMC1, <b>NME1</b>                                                                                                                                             |
| 0.034 | MF   | histone kinase activity (H3-T6 specific)                         | PRKCA, PRKCB                                                                                                                                                                              |
| 0.033 | CC   | laminin-2 complex                                                | LAMB1, LAMC2                                                                                                                                                                              |
| 0.033 | CC   | laminin-3 complex                                                | LAMA1, LAMB2                                                                                                                                                                              |
| 0.051 | BP   | negative regulation of insulin receptor signaling pathway        | IRS1, PRKCA, <b>PTPRF</b>                                                                                                                                                                 |
| 0.136 | BP   | negative regulation of cell differentiation                      | ARHGEF2, CAV1, CTNNB1, ITGAV, ITGB1, <b>NME1</b> , PTK2, TLR4                                                                                                                             |
| 0.051 | BP   | regulation of glycoprotein biosynthetic process                  | CTNNB1, HBEGF, INSR                                                                                                                                                                       |
| 0.233 | CC   | integral to plasma membrane                                      | <b>ATP1B3</b> , <b>BST2</b> , CAV1, CAV2, GJA1, HBEGF, INSR, IRS1, <b>ITGA6</b> , ITGAV, ITGB1, <b>PTPRF</b> , SLC8A1, TLR4                                                               |
| 0.288 | BP   | system process                                                   | CAV1, CAV2, CAV3, CTNNB1, GJA1, HBEGF, ILK, LAMB2, LAMC3, PRKCA, PRKCB, PRKCG, PTK2, <b>PTPRF</b> , SLC8A1, SRC, TLR4                                                                     |
| 0.237 | BP   | tissue development                                               | CAV1, CAV2, CTNNB1, GJA1, ILK, ITGB1, LAMA3, LAMA5, LAMB2, LAMB3, LAMC1, LAMC2, PRKCA, SRC                                                                                                |
| 0.034 | BP   | caveola assembly                                                 | CAV1, CAV2                                                                                                                                                                                |
| 0.034 | BP   | histone H3-T6 phosphorylation                                    | PRKCA, PRKCB                                                                                                                                                                              |
| 0.034 | BP   | membrane raft assembly                                           | CAV1, CAV2                                                                                                                                                                                |
| 0.153 | BP   | negative regulation of cell proliferation                        | CAV1, CAV2, CTNNB1, GJA1, ILK, ITGB1, <b>NME1</b> , PRKCA, <b>PTPRF</b>                                                                                                                   |
| 0.050 | CC   | intercalated disc                                                | CTNNB1, GJA1, ITGB1                                                                                                                                                                       |
| 0.051 | BP   | modification by symbiont of host morphology or physiology        | INSR, ITGAV, TLR4                                                                                                                                                                         |
| 0.136 | BP   | positive regulation of transport                                 | CAV1, INSR, IRS1, IRS2, ITGAV, ITGB1, PRKCA, TLR4                                                                                                                                         |
| 0.133 | CC   | perinuclear region of cytoplasm                                  | CAV1, CAV2, CTNNB1, DYNC1H1, LAMB1, LAMC2, <b>NME1</b> , TLR4                                                                                                                             |
| 0.186 | BP   | chemical homeostasis                                             | CAV1, CAV3, CTNNB1, ILK, INSR, IRS1, IRS2, ITGB1, PRKCA, PRKCB, SLC8A1                                                                                                                    |
| 0.033 | CC   | insulin receptor complex                                         | INSR, IRS1                                                                                                                                                                                |
| 0.068 | BP   | regulation of smooth muscle cell proliferation                   | CTNNB1, HBEGF, ILK, PRKCA                                                                                                                                                                 |
| 0.085 | BP   | G2/M transition of mitotic cell cycle                            | DYNC1H1, DYNC1I2, TUBB, TUBB2C, TUBB4                                                                                                                                                     |
| 0.085 | BP   | positive regulation of MAPKKK cascade                            | CTNNB1, ILK, INSR, ITGB1, TLR4                                                                                                                                                            |
| 0.085 | BP   | response to carbohydrate stimulus                                | INSR, IRS2, PRKCA, PRKCB, SLC8A1                                                                                                                                                          |
| 0.068 | MF   | structural constituent of cytoskeleton                           | ACTB, ACTG1, TUBB, TUBB1                                                                                                                                                                  |
| 0.051 | BP   | positive regulation of glucose import                            | INSR, IRS1, IRS2                                                                                                                                                                          |
| 0.102 | MF   | peptide binding                                                  | INSR, ITGB1, TUBB, TUBB2A, TUBB2B, TUBB3                                                                                                                                                  |
| 0.033 | CC   | lipopolysaccharide receptor complex                              | HSPD1, TLR4                                                                                                                                                                               |
| 0.068 | MF   | microtubule motor activity                                       | DYNC1H1, DYNC1I1, DYNC1I2, DYNC2H1                                                                                                                                                        |
| 0.050 | CC   | integrin complex                                                 | <b>ITGA6</b> , ITGAV, ITGB1                                                                                                                                                               |
| 0.051 | BP   | negative regulation of myeloid leukocyte differentiation         | CTNNB1, <b>NME1</b> , TLR4                                                                                                                                                                |
| 0.254 | MF   | ATP binding                                                      | ACTB, ACTG1, DYNC1H1, DYNC1L1, DYNC1L2, DYNC2H1, HSPD1, ILK, INSR, <b>NME1</b> , PRKCA, PRKCB, PRKCG, PTK2, SRC                                                                           |
| 0.085 | BP   | regulation of calcium ion transport                              | CAV1, CAV3, CTNNB1, GJA1, SLC8A1                                                                                                                                                          |
| 0.050 | CC   | basal plasma membrane                                            | CAV1, <b>ITGA6</b> , ITGB1                                                                                                                                                                |
| 0.068 | MF   | extracellular matrix structural constituent                      | LAMA1, LAMA4, LAMB1, LAMC1                                                                                                                                                                |
| 0.085 | BP   | negative regulation of kinase activity                           | CAV1, CAV3, ILK, IRS2, PRKCA                                                                                                                                                              |
| 0.136 | BP   | blood vessel development                                         | CAV1, CTNNB1, GJA1, ITGAV, ITGB1, LAMA4, LAMA5, PTK2                                                                                                                                      |
| 0.034 | MF   | ion channel binding                                              | CTNNB1, SRC                                                                                                                                                                               |
| 0.102 | BP   | regulation of MAP kinase activity                                | CAV1, CAV3, ILK, INSR, PRKCA, TLR4                                                                                                                                                        |
| 0.085 | BP   | positive regulation of I-kappaB kinase/NF-kappaB cascade         | <b>BST2</b> , CTNNB1, GJA1, PRKCB, TLR4                                                                                                                                                   |

Continued on next page...

| Ratio | Type | Description                                                  | Genes                                                                          |
|-------|------|--------------------------------------------------------------|--------------------------------------------------------------------------------|
| 0.050 | CC   | dendritic shaft                                              | ARHGEF2, CTNNB1, ILK                                                           |
| 0.051 | BP   | cell adhesion mediated by integrin                           | ITGA6, ITGB1, PTK2                                                             |
| 0.102 | BP   | extracellular structure organization                         | CTNNB1, ILK, LAMB2, LAMC1, PRKCA, PTK2                                         |
| 0.102 | BP   | striated muscle tissue development                           | CAV1, CAV2, GJA1, ILK, ITGB1, LAMB2                                            |
| 0.102 | BP   | muscle contraction                                           | CAV1, CAV3, GJA1, PRKCA, SLC8A1, TLR4                                          |
| 0.102 | BP   | cellular calcium ion homeostasis                             | CAV1, CAV3, ITGB1, PRKCA, PRKCB, SLC8A1                                        |
| 0.051 | BP   | positive regulation of mesenchymal cell proliferation        | CTNNB1, IRS1, IRS2                                                             |
| 0.136 | MF   | protein tyrosine kinase activity                             | ILK, INSR, IRS1, PRKCA, PRKCB, PRKCG, PTK2, SRC                                |
| 0.034 | MF   | insulin-like growth factor I binding                         | INSR, ITGAV                                                                    |
| 0.102 | BP   | platelet activation                                          | PRKCA, PRKCB, PRKCG, SLC8A1, SRC, TLR4                                         |
| 0.119 | BP   | response to inorganic substance                              | ACTB, ACTG1, CAV1, CTNNB1, INSR, PRKCA, SLC8A1                                 |
| 0.051 | BP   | regulation of microtubule polymerization or depolymerization | ARHGEF2, CAV1, CAV3                                                            |
| 0.051 | BP   | regulation of nitric oxide biosynthetic process              | CAV1, INSR, TLR4                                                               |
| 0.034 | BP   | positive regulation of fatty acid beta-oxidation             | IRS1, IRS2                                                                     |
| 0.034 | BP   | positive regulation of interferon-alpha production           | HSPD1, TLR4                                                                    |
| 0.102 | BP   | protein oligomerization                                      | CAV1, CAV2, GJA1, ILK, INSR, IRS1                                              |
| 0.051 | BP   | cytoskeleton-dependent intracellular transport               | DYNC1I1, TUBA1C, TUBB                                                          |
| 0.068 | BP   | tissue homeostasis                                           | CTNNB1, ITGB1, SRC, TLR4                                                       |
| 0.051 | BP   | adherens junction organization                               | ACTB, ACTG1, CTNNB1                                                            |
| 0.119 | BP   | blood vessel morphogenesis                                   | CAV1, CTNNB1, GJA1, ITGAV, ITGB1, LAMA5, PTK2                                  |
| 0.068 | BP   | odontogenesis                                                | CTNNB1, ITGA6, LAMA5, LAMB1                                                    |
| 0.102 | BP   | regulation of lymphocyte activation                          | CAV1, CTNNB1, HSPD1, IRS2, SRC, TLR4                                           |
| 0.203 | BP   | cell-cell signaling                                          | ADAM10, BST2, CAV2, CTNNB1, GJA1, IRS1, IRS2, PRKCA, PRKCB, PRKCG, PTK2, PTPRF |
| 0.102 | BP   | negative regulation of cellular component organization       | ARHGEF2, CAV3, DYNC1LI1, ITGB1, PTK2, PTPRF                                    |
| 0.102 | BP   | gland development                                            | CAV1, CTNNB1, IRS1, IRS2, LAMA5, SRC                                           |
| 0.051 | BP   | response to activity                                         | INSR, ITGB1, TLR4                                                              |
| 0.119 | BP   | regulation of nervous system development                     | ARHGEF2, CTNNB1, ILK, ITGB1, PRKCA, PTK2, PTPRF                                |
| 0.068 | BP   | regulation of endocytosis                                    | CAV1, ITGAV, ITGB1, PRKCA                                                      |
| 0.068 | BP   | regulation of heart contraction                              | CAV3, GJA1, HBEGF, PRKCA                                                       |
| 0.067 | CC   | focal adhesion                                               | CAV1, ILK, ITGB1, PTK2                                                         |
| 0.119 | BP   | response to cytokine stimulus                                | ADAM10, CAV1, CTNNB1, INSR, PRKCA, PTPRF, SRC                                  |
| 0.050 | CC   | cell-cell adherens junction                                  | CTNNB1, GJA1, ITGA6                                                            |
| 0.068 | BP   | positive regulation of cell adhesion                         | ILK, ITGA6, ITGAV, ITGB1                                                       |
| 0.051 | BP   | positive regulation of protein kinase B signaling cascade    | HBEGF, ILK, INSR                                                               |
| 0.051 | BP   | regulation of synapse structure and activity                 | PRKCA, PTK2, PTPRF                                                             |
| 0.068 | BP   | positive regulation of epithelial cell proliferation         | CTNNB1, LAMB1, LAMC1, NME1                                                     |
| 0.034 | MF   | phosphatidylinositol-4,5-bisphosphate 3-kinase activity      | IRS1, IRS2                                                                     |
| 0.034 | BP   | positive regulation of glycoprotein biosynthetic process     | CTNNB1, INSR                                                                   |
| 0.068 | BP   | synapse organization                                         | CTNNB1, LAMB2, PRKCA, PTK2                                                     |
| 0.167 | CC   | vesicle                                                      | ADAM10, ATP1B3, CAV1, CAV2, DYNC1I1, DYNC1I2, FASN, GJA1, HSPD1, ITGB1         |
| 0.051 | BP   | positive regulation of cell-substrate adhesion               | ILK, ITGA6, ITGB1                                                              |
| 0.067 | CC   | synaptosome                                                  | ITGB1, LAMB2, PRKCA, PRKCG                                                     |
| 0.068 | BP   | epidermal growth factor receptor signaling pathway           | ADAM10, HBEGF, PTPRF, SRC                                                      |
| 0.068 | BP   | regulation of peptidyl-tyrosine phosphorylation              | CAV1, ITGB1, PRKCA, TLR4                                                       |
| 0.034 | MF   | MHC class I protein binding                                  | TUBB, TUBB2C                                                                   |
| 0.153 | BP   | central nervous system development                           | CTNNB1, DYNC2H1, IRS2, LAMB2, LAMC3, PRKCA, PTK2, SLC8A1, SRC                  |
| 0.034 | BP   | positive regulation of microtubule polymerization            | CAV1, CAV3                                                                     |
| 0.100 | CC   | centrosome                                                   | CTNNB1, DYNC1H1, DYNC1I2, DYNC1LI1, DYNC1LI2, NME1                             |
| 0.085 | BP   | positive regulation of lymphocyte activation                 | CAV1, HSPD1, IRS2, SRC, TLR4                                                   |
| 0.051 | BP   | negative regulation of MAPKKK cascade                        | CAV1, CAV3, TLR4                                                               |
| 0.034 | BP   | astrocyte development                                        | LAMB2, LAMC3                                                                   |
| 0.033 | CC   | acrosomal membrane                                           | CAV1, CAV2                                                                     |
| 0.033 | CC   | fascia adherens                                              | CTNNB1, GJA1                                                                   |
| 0.119 | BP   | regulation of cell development                               | ARHGEF2, CAV3, CTNNB1, ILK, ITGB1, PTK2, PTPRF                                 |
| 0.034 | BP   | positive regulation of dendrite morphogenesis                | ILK, PTPRF                                                                     |
| 0.117 | CC   | synapse                                                      | ADAM10, CAV3, CTNNB1, ILK, INSR, ITGB1, PTPRF                                  |
| 0.034 | MF   | insulin-like growth factor receptor binding                  | INSR, IRS1                                                                     |
| 0.034 | MF   | lipopolysaccharide binding                                   | HSPD1, TLR4                                                                    |
| 0.068 | BP   | mammary gland development                                    | CAV1, IRS1, IRS2, SRC                                                          |
| 0.068 | BP   | response to mechanical stimulus                              | CAV1, ITGB1, PRKCA, TLR4                                                       |
| 0.067 | CC   | myofibril                                                    | ACTG1, CAV3, CTNNB1, ILK                                                       |
| 0.085 | BP   | positive regulation of protein phosphorylation               | CAV1, INSR, ITGB1, PRKCA, TLR4                                                 |
| 0.034 | BP   | negative regulation of osteoclast differentiation            | CTNNB1, TLR4                                                                   |
| 0.068 | BP   | positive regulation of growth                                | ADAM10, HBEGF, ILK, INSR                                                       |
| 0.085 | BP   | epithelial tube morphogenesis                                | CTNNB1, GJA1, ILK, LAMA5, SRC                                                  |
| 0.051 | BP   | positive regulation of endocytosis                           | CAV1, ITGAV, ITGB1                                                             |
| 0.051 | BP   | protein heterooligomerization                                | ILK, INSR, IRS1                                                                |
| 0.051 | BP   | regulation of wound healing                                  | CAV1, HBEGF, TLR4                                                              |
| 0.051 | MF   | signaling adaptor activity                                   | IRS1, IRS4, SRC                                                                |
| 0.051 | BP   | B cell proliferation                                         | HSPD1, IRS2, TLR4                                                              |
| 0.051 | BP   | branching involved in ureteric bud morphogenesis             | CTNNB1, ILK, LAMA5                                                             |
| 0.051 | BP   | negative regulation of cell projection organization          | ITGB1, PTK2, PTPRF                                                             |
| 0.051 | BP   | negative regulation of protein phosphorylation               | CAV1, INSR, PRKCA                                                              |
| 0.051 | BP   | odontogenesis of dentine-containing tooth                    | CTNNB1, ITGA6, LAMA5                                                           |
| 0.051 | BP   | vasculogenesis                                               | CAV1, CTNNB1, PTK2                                                             |

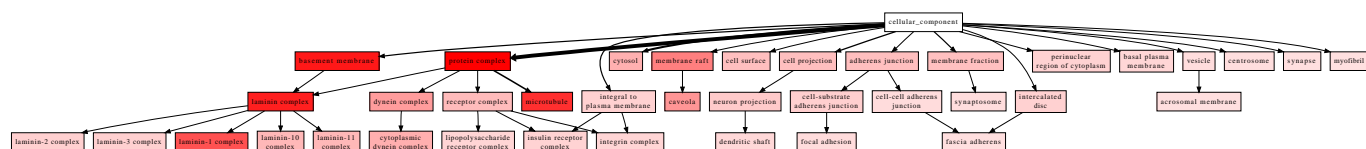

Figure 2: Relationships between the enriched *cellular component* Gene Ontology terms that were listed in Table 4. The darkness of the red reflects the significance of the enrichment and the thicknesses of the edges are proportional to the numbers of genes sharing the following annotation.



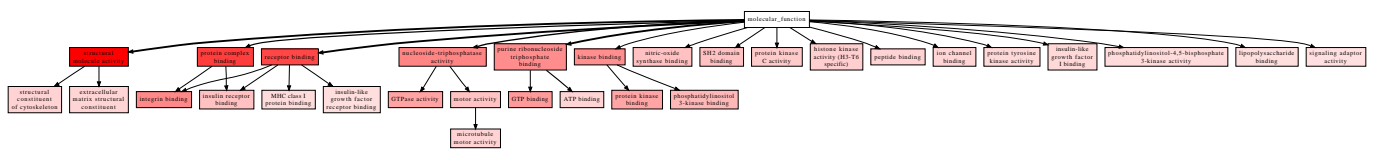

Figure 3: Relationships between the enriched *molecular function* Gene Ontology terms that were listed in Table 4. The darkness of the red reflects the significance of the enrichment and the thicknesses of the edges are proportional to the numbers of genes sharing the following annotation.

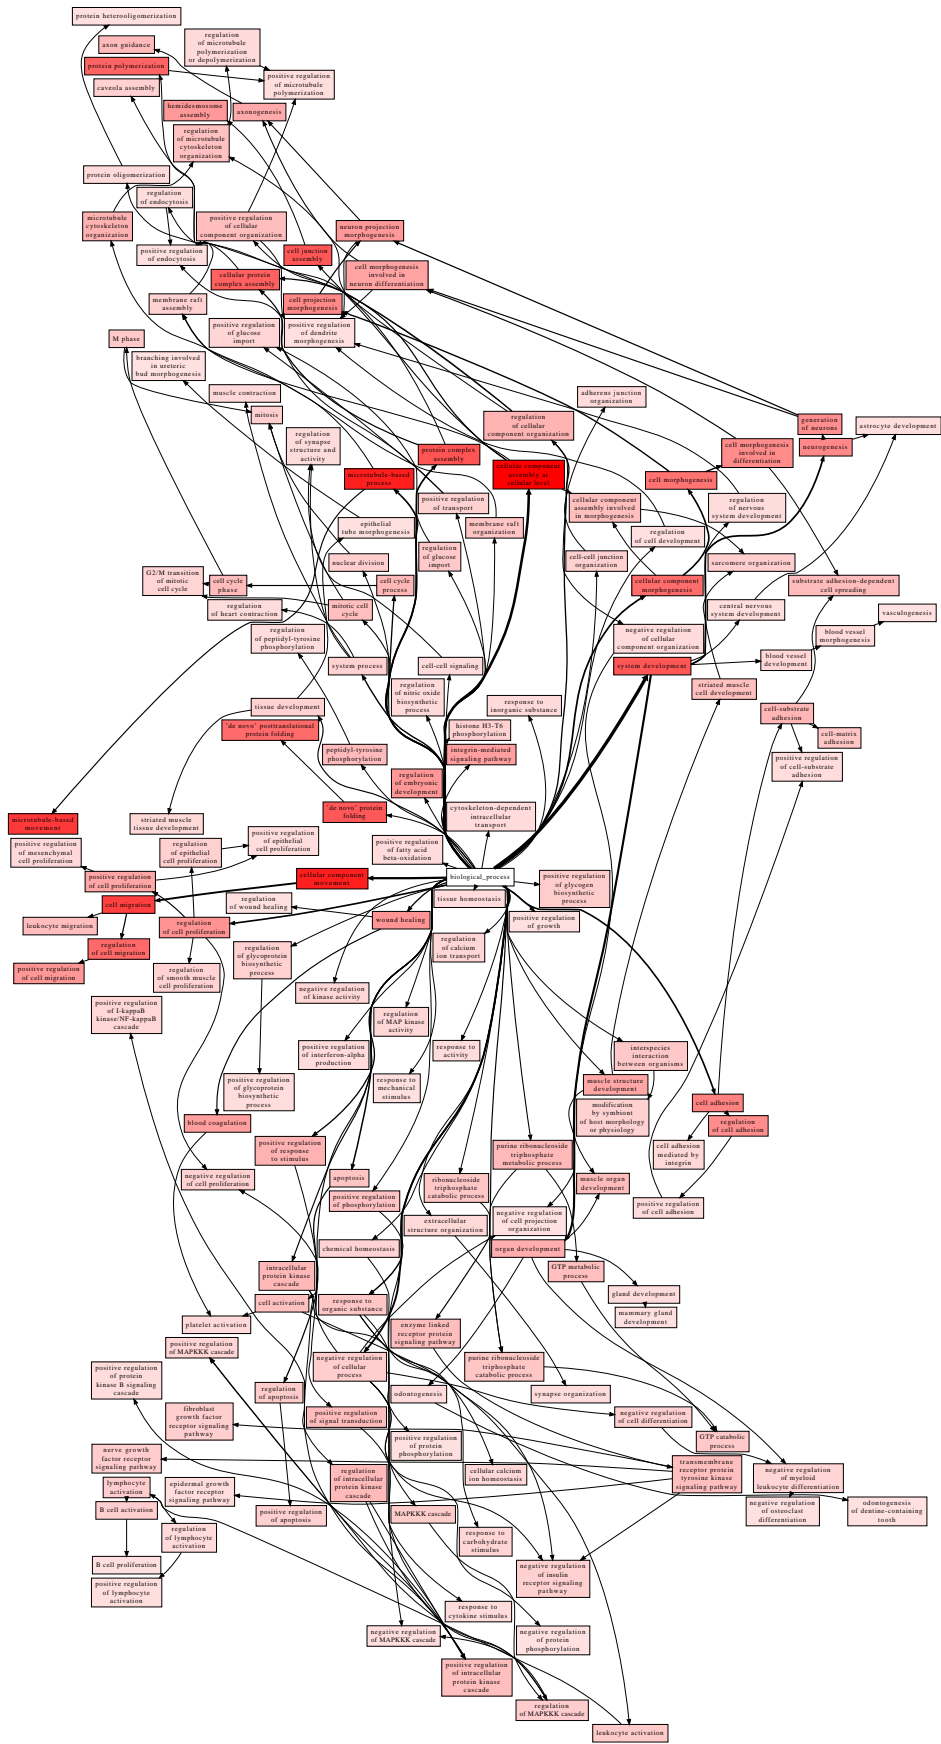

Figure 4: Relationships between the enriched *biological process* Gene Ontology terms that were listed in Table 4. The darkness of the red reflects the significance of the enrichment and the thicknesses of the edges are proportional to the numbers of genes sharing the following annotation.

## 1.2 Candidate genes

Table 5: Descriptions of the candidate genes. Studies that have reported results about the candidate genes are listed so that those with negative evidence have been prefixed with a hyphen. S column contains an at sign if the gene is part of the candidate pathway. The statuses of the genes are shown as: *a*=absent, *d*=down regulated, *u*=up regulated, *s*=stable. This table has 23 rows.

| S  | name    | locus                            | description                                                                                                                                                                                                                                                                                                                                                                                                                                                                                                                                                                                                                                                                                                                                                                                                                                                                                                                                                                                                                                                                                                                                                                                                                                                                                                                                                                                                                                                                                                                                                                                                                                                                               | studies                                                                                                                                                                                           |
|----|---------|----------------------------------|-------------------------------------------------------------------------------------------------------------------------------------------------------------------------------------------------------------------------------------------------------------------------------------------------------------------------------------------------------------------------------------------------------------------------------------------------------------------------------------------------------------------------------------------------------------------------------------------------------------------------------------------------------------------------------------------------------------------------------------------------------------------------------------------------------------------------------------------------------------------------------------------------------------------------------------------------------------------------------------------------------------------------------------------------------------------------------------------------------------------------------------------------------------------------------------------------------------------------------------------------------------------------------------------------------------------------------------------------------------------------------------------------------------------------------------------------------------------------------------------------------------------------------------------------------------------------------------------------------------------------------------------------------------------------------------------|---------------------------------------------------------------------------------------------------------------------------------------------------------------------------------------------------|
| u* | ADAM10  | 15:58887403-59042177<br>15q21.3  | ADAM metallopeptidase domain 10 [Source:HGNC Symbol;Acc:188], type=processed_transcript,protein_coding,retained_intron, GO=[constitutive protein ectodomain proteolysis; PMA-inducible membrane protein ectodomain proteolysis; monocyte activation; T cell chemotaxis; regulation of T cell chemotaxis; positive regulation of T cell chemotaxis; Notch receptor processing; Golgi-associated vesicle; negative regulation of cell adhesion; integrin-mediated signaling pathway; response to tumor necrosis factor; integrin binding; Notch signaling pathway; positive regulation of cell growth; myeloid leukocyte activation; metalloendopeptidase activity; postsynaptic density; epidermal growth factor receptor signaling pathway; SH3 domain binding; positive regulation of cell migration; regulation of cell adhesion; leukocyte migration; protein kinase binding; in utero embryonic development; cell surface; protein homodimerization activity; chemotaxis; protein dimerization activity; identical protein binding]                                                                                                                                                                                                                                                                                                                                                                                                                                                                                                                                                                                                                                                   | tcgaBreastGE,<br>tcgaBreastMethyl,<br>tcgaColonGE,<br>tcgaColonMethyl,<br>tcgaOvarianMethyl,<br>tscapeCRCd                                                                                        |
|    | ALDH7A1 | 5:125877533-125931110<br>5q23.2  | aldehyde dehydrogenase 7 family, member A1 [Source:HGNC Symbol;Acc:877], type=nonsense_mediated_decay,processed_transcript,protein_coding,retained_intron, GO=[betaine-aldehyde dehydrogenase activity; L-aminoadipate-semialdehyde dehydrogenase activity; lysine catabolic process; lysine metabolic process; aldehyde dehydrogenase (NAD) activity; aspartate family amino acid catabolic process; cellular aldehyde metabolic process; aspartate family amino acid metabolic process; sensory perception of sound; mitochondrial matrix]                                                                                                                                                                                                                                                                                                                                                                                                                                                                                                                                                                                                                                                                                                                                                                                                                                                                                                                                                                                                                                                                                                                                              | tcgaBreastGE,<br>tcgaBreastMethyl,<br>tcgaColonGE,<br>tcgaOvarianMethyl,<br>tscapeOvariand,<br>tscapeProstated<br>tcgaBreastMethyl                                                                |
| u  | ART3    | 4:76932337-77033955<br>4q21.1    | ADP-ribosyltransferase 3 [Source:HGNC Symbol;Acc:725], type=processed_transcript,protein_coding,retained_intron, GO=[NAD(P)+-protein-arginine ADP-ribosyltransferase activity; NAD+ ADP-ribosyltransferase activity; protein ADP-ribosylation; anchored to membrane]                                                                                                                                                                                                                                                                                                                                                                                                                                                                                                                                                                                                                                                                                                                                                                                                                                                                                                                                                                                                                                                                                                                                                                                                                                                                                                                                                                                                                      | tcgaBreastMethyl,<br>tcgaColonMethyl,<br>tscapeBCd, tscapeCRCd                                                                                                                                    |
|    | ATP10A  | 15:25922420-26110317<br>15q12    | ATPase, class V, type 10A [Source:HGNC Symbol;Acc:13542], type=nonsense_mediated_decay,processed_transcript,protein_coding,retained_intron, GO=[phospholipid-translocating ATPase activity; phospholipid transport; ATPase activity, coupled to transmembrane movement of ions, phosphorylative mechanism; regulation of cell shape; ATP biosynthetic process; purine ribonucleoside triphosphate biosynthetic process; ATP metabolic process; magnesium ion binding; lipid transport; ion transmembrane transport]                                                                                                                                                                                                                                                                                                                                                                                                                                                                                                                                                                                                                                                                                                                                                                                                                                                                                                                                                                                                                                                                                                                                                                       | tcgaBreastMethyl,<br>tcgaColonMethyl,<br>tscapeBCd, tscapeCRCd                                                                                                                                    |
| u* | ATP1B3  | 3:141594966-141645356<br>3q23    | ATPase, Na+/K+ transporting, beta 3 polypeptide [Source:HGNC Symbol;Acc:806], type=nonsense_mediated_decay,processed_transcript,protein_coding,retained_intron, GO=[sodium:potassium-exchanging ATPase complex; sodium:potassium-exchanging ATPase activity; ATPase activity, coupled to transmembrane movement of ions, phosphorylative mechanism; caveola; ATP biosynthetic process; melanosome; purine ribonucleoside triphosphate biosynthetic process; ATP metabolic process; sodium ion transport; membrane raft; potassium ion transport; leukocyte migration; ion transmembrane transport; blood coagulation]                                                                                                                                                                                                                                                                                                                                                                                                                                                                                                                                                                                                                                                                                                                                                                                                                                                                                                                                                                                                                                                                     | tcgaBreastMethyl,<br>tcgaColonGE,<br>tcgaColonMethyl,<br>tcgaOvarianMethyl                                                                                                                        |
| u* | BST2    | 19:17502082-17516457<br>19p13.11 | bone marrow stromal cell antigen 2 [Source:HGNC Symbol;Acc:1119], type=processed_transcript,protein_coding,retained_intron, GO=[defense response to virus; late endosome; anchored to membrane; humoral immune response; positive regulation of I-kappaB kinase/NF-kappaB cascade; B cell activation; positive regulation of intracellular protein kinase cascade; endosome; protein homodimerization activity; protein dimerization activity; identical protein binding]                                                                                                                                                                                                                                                                                                                                                                                                                                                                                                                                                                                                                                                                                                                                                                                                                                                                                                                                                                                                                                                                                                                                                                                                                 | tcgaBreastGE,<br>tcgaBreastMethyl,<br>tcgaColonMethyl,<br>tcgaGliomaGE,<br>tcgaOvarianCGHa,<br>tcgaOvarianMethyl                                                                                  |
| u* | CD109   | 6:74405508-74538040<br>6q13      | CD109 molecule [Source:HGNC Symbol;Acc:21685], type=processed_transcript,protein_coding, GO=[serine-type endopeptidase inhibitor activity; anchored to membrane; extracellular space]                                                                                                                                                                                                                                                                                                                                                                                                                                                                                                                                                                                                                                                                                                                                                                                                                                                                                                                                                                                                                                                                                                                                                                                                                                                                                                                                                                                                                                                                                                     | tcgaBreastGE,<br>tcgaBreastMethyl,<br>tcgaColonMethyl,<br>tcgaGliomaGE,<br>tcgaOvarianGE                                                                                                          |
|    | CD97    | 19:14492213-14519531<br>19p13.12 | CD97 molecule [Source:HGNC Symbol;Acc:1711], type=protein_coding, GO=[neuropeptide signaling pathway; inflammatory response; calcium ion binding; extracellular space; G-protein coupled receptor activity]                                                                                                                                                                                                                                                                                                                                                                                                                                                                                                                                                                                                                                                                                                                                                                                                                                                                                                                                                                                                                                                                                                                                                                                                                                                                                                                                                                                                                                                                               | cosmicRecurrent,<br>tcgaGliomaGE,<br>tcgaOvarianCGHa                                                                                                                                              |
|    | CHL1    | 3:238279-451090 3p26.3           | cell adhesion molecule with homology to L1CAM (close homolog of L1) [Source:HGNC Symbol;Acc:1939], type=nonsense_mediated_decay,processed_transcript,protein_coding, GO=[adult locomotory behavior; neuron migration; cognition; apical part of cell; dendrite; axon guidance; cell morphogenesis involved in neuron differentiation; neuron projection morphogenesis; chemotaxis]                                                                                                                                                                                                                                                                                                                                                                                                                                                                                                                                                                                                                                                                                                                                                                                                                                                                                                                                                                                                                                                                                                                                                                                                                                                                                                        | tcgaBreastGE,<br>tcgaBreastMethyl,<br>tcgaColonGE,<br>tcgaColonMethyl,<br>tcgaGliomaGE,<br>tscapeNSCLCd,<br>tscapeOvariand<br>tcgaGliomaGE,<br>tscapeMelanoma,<br>tscapeNSCLCa,<br>tscapeOvariana |
| *  | FASN    | 17:80036215-80056106<br>17q25.3  | fatty acid synthase [Source:HGNC Symbol;Acc:3594], type=protein_coding, GO=[enoyl-[acyl-carrier-protein] reductase (NADPH, B-specific) activity; 3-oxoacyl-[acyl-carrier-protein] reductase activity; [acyl-carrier-protein] S-acetyltransferase activity; 3-hydroxypalmitoyl-[acyl-carrier-protein] hydratase activity; myristoyl-[acyl-carrier-protein] hydrolase activity; [acyl-carrier-protein] S-malonyltransferase activity; palmitoyl-[acyl-carrier-protein] hydrolase activity; 3-oxoacyl-[acyl-carrier-protein] synthase activity; oleoyl-[acyl-carrier-protein] hydrolase activity; phosphopantetheine binding; acyl carrier activity; glycogen granule; pantothenate metabolic process; long-chain fatty-acyl-CoA biosynthetic process; long-chain fatty-acyl-CoA metabolic process; triglyceride biosynthetic process; melanosome; vitamin binding; fatty acid biosynthetic process; energy reserve metabolic process; cofactor binding]                                                                                                                                                                                                                                                                                                                                                                                                                                                                                                                                                                                                                                                                                                                                     | tcgaBreastGE,<br>tcgaBreastMethyl,<br>tcgaColonGE,<br>tcgaColonMethyl,<br>tscapeNSCLCd,<br>tscapeOvariand<br>tcgaGliomaGE,<br>tscapeMelanoma,<br>tscapeNSCLCa,<br>tscapeOvariana                  |
| d  | GOT2    | 16:58741035-58768239<br>16q21    | glutamic-oxaloacetic transaminase 2, mitochondrial (aspartate aminotransferase 2) [Source:HGNC Symbol;Acc:4433], type=protein_coding,retained_intron, GO=[L-aspartate:2-oxoglutarate aminotransferase activity; aspartate biosynthetic process; glutamate catabolic process to aspartate; glutamate catabolic process to 2-oxoglutarate; aspartate catabolic process; oxaloacetate metabolic process; aspartate family amino acid catabolic process; aspartate family amino acid biosynthetic process; aspartate family amino acid metabolic process; pyridoxal phosphate binding; gluconeogenesis; fatty acid transport; response to ethanol; vitamin binding; lipid transport; mitochondrial matrix; cofactor binding; mitochondrial inner membrane]                                                                                                                                                                                                                                                                                                                                                                                                                                                                                                                                                                                                                                                                                                                                                                                                                                                                                                                                    | tcgaBreastGE,<br>tcgaBreastMethyl,<br>tcgaColonGE,<br>tcgaColonMethyl,<br>tcgaGliomaGE,<br>tcgaOvarianMethyl                                                                                      |
| u  | GPR56   | 16:57662419-57698944<br>16q21    | G protein-coupled receptor 56 [Source:HGNC Symbol;Acc:4512], type=protein_coding, GO=[neuropeptide signaling pathway; brain development; G-protein coupled receptor activity]                                                                                                                                                                                                                                                                                                                                                                                                                                                                                                                                                                                                                                                                                                                                                                                                                                                                                                                                                                                                                                                                                                                                                                                                                                                                                                                                                                                                                                                                                                             | tcgaBreastGE,<br>tcgaColonGE,<br>tcgaGliomaGE                                                                                                                                                     |
| *  | HSPD1   | 2:198351305-198381461<br>2q33.1  | heat shock 60kDa protein 1 (chaperonin) [Source:HGNC Symbol;Acc:5261], type=nonsense_mediated_decay,protein_coding,retained_intron, GO=[B cell cytokine production; T cell mediated immune response to tumor cell; regulation of T cell mediated immune response to tumor cell; positive regulation of T cell mediated immune response to tumor cell; lipopolysaccharide receptor complex; cyclin-dependent protein kinase activating kinase holoenzyme complex; DNA replication origin binding; positive regulation of interferon-alpha production; positive regulation of macrophage activation; isotype switching to IgG isotypes; chaperone-mediated protein complex assembly; lipopolysaccharide binding; protein refolding; positive regulation of interleukin-10 production; positive regulation of interleukin-12 production; positive regulation of interferon-gamma production; positive regulation of interleukin-6 production; p53 binding; chaperone binding; cell surface binding; coated pit; protein stabilization; 'de novo' protein folding; single-stranded DNA binding; B cell proliferation; response to unfolded protein; MyD88-dependent toll-like receptor signaling pathway; activation of caspase activity; ATP catabolic process; myeloid leukocyte activation; protein maturation; unfolded protein binding; early endosome; ATP metabolic process; positive regulation of T cell activation; B cell activation; response to protein stimulus; coated vesicle; stored secretory granule; mitochondrial matrix; mitochondrial inner membrane; cell surface; endosome; negative regulation of apoptosis; positive regulation of apoptosis; extracellular space] | tcgaBreastGE,<br>tcgaColonGE,<br>tcgaGliomaGE,<br>tcgaColonMethyl,<br>tcgaOvarianMethyl                                                                                                           |
| u  | IGSF8   | 1:160061130-160068733<br>1q23.2  | immunoglobulin superfamily, member 8 [Source:HGNC Symbol;Acc:17813], type=processed_transcript,protein_coding, GO=[single fertilization; skeletal muscle tissue development; striated muscle tissue development]                                                                                                                                                                                                                                                                                                                                                                                                                                                                                                                                                                                                                                                                                                                                                                                                                                                                                                                                                                                                                                                                                                                                                                                                                                                                                                                                                                                                                                                                          | tcgaBreastGE,<br>tcgaBreastMethyl,<br>tcgaGliomaGE,<br>tcgaOvarianMethyl                                                                                                                          |
| u* | ITGA6   | 2:173292082-173371181<br>2q31.1  | integrin, alpha 6 [Source:HGNC Symbol;Acc:6142], type=protein_coding,retained_intron, GO=[alpha6-beta4 integrin complex; hemidesmosome assembly; laminin binding; positive regulation of cell-cell adhesion; brown fat cell differentiation; integrin complex; basal plasma membrane; cell adhesion mediated by integrin; cellular response to organic cyclic compound; cell-cell adherens junction; filopodium assembly; filopodium; positive regulation of cell-substrate adhesion; odontogenesis of dentine-containing tooth; integrin-mediated signaling pathway; integrin binding; basement membrane; positive regulation of cell adhesion; cell-matrix adhesion; external side of plasma membrane; adherens junction; regulation of cell adhesion; leukocyte migration; positive regulation of phosphorylation; cell-cell adhesion; cell surface; blood coagulation; negative regulation of apoptosis; positive regulation of apoptosis; positive regulation of transcription from RNA polymerase II promoter]                                                                                                                                                                                                                                                                                                                                                                                                                                                                                                                                                                                                                                                                      | tcgaBreastGE,<br>tcgaBreastMethyl,<br>tcgaColonGE,<br>tcgaColonMethyl,<br>tcgaGliomaGE,<br>tcgaOvarianMethyl                                                                                      |

Continued on next page...

| S  | name          | locus                            | description                                                                                                                                                                                                                                                                                                                                                                                                                                                                                                                                                                                                                                                                                                                                                                                                                                                                                                                                                                                                                                                                                                                                                                                                                                                                                                                                                                                                                                                                                                                                                                                                                                                                                                                                                                                                                                                                                                                                                                                                                                                                                                                                                                                                                                                                                                                                                                                                                                                                                                                                                                                                                                                                                                                                                                                                                                                                                                                                                                                 | studies                                                                                                                                               |
|----|---------------|----------------------------------|---------------------------------------------------------------------------------------------------------------------------------------------------------------------------------------------------------------------------------------------------------------------------------------------------------------------------------------------------------------------------------------------------------------------------------------------------------------------------------------------------------------------------------------------------------------------------------------------------------------------------------------------------------------------------------------------------------------------------------------------------------------------------------------------------------------------------------------------------------------------------------------------------------------------------------------------------------------------------------------------------------------------------------------------------------------------------------------------------------------------------------------------------------------------------------------------------------------------------------------------------------------------------------------------------------------------------------------------------------------------------------------------------------------------------------------------------------------------------------------------------------------------------------------------------------------------------------------------------------------------------------------------------------------------------------------------------------------------------------------------------------------------------------------------------------------------------------------------------------------------------------------------------------------------------------------------------------------------------------------------------------------------------------------------------------------------------------------------------------------------------------------------------------------------------------------------------------------------------------------------------------------------------------------------------------------------------------------------------------------------------------------------------------------------------------------------------------------------------------------------------------------------------------------------------------------------------------------------------------------------------------------------------------------------------------------------------------------------------------------------------------------------------------------------------------------------------------------------------------------------------------------------------------------------------------------------------------------------------------------------|-------------------------------------------------------------------------------------------------------------------------------------------------------|
| *  | <b>ITGAV</b>  | 2:187454790-187545628<br>2q32.1  | integrin, alpha V (vitronectin receptor, alpha polypeptide, antigen CD51) [Source:HGNC Symbol;Acc:6150], type=processed_transcript,protein_coding,retained_intron, GO=[entry of bacterium into host cell; entry of symbiont into host cell by promotion of host phagocytosis; regulation of apoptotic cell clearance; negative regulation of low-density lipoprotein particle receptor biosynthetic process; positive regulation of osteoblast proliferation; negative regulation of lipoprotein metabolic process; opsonin binding; insulin-like growth factor I binding; transforming growth factor beta binding; negative regulation of macrophage derived foam cell differentiation; negative regulation of lipid storage; entry of virus into host cell; negative regulation of lipid transport; integrin complex; integrin-mediated signaling pathway; ERK1 and ERK2 cascade; positive regulation of cell adhesion; cell-matrix adhesion; external side of plasma membrane; positive regulation of cell migration; lipid transport; regulation of cell adhesion; leukocyte migration; negative regulation of cell differentiation; axon guidance; cell surface; blood coagulation; negative regulation of apoptosis; cell morphogenesis involved in neuron differentiation; neuron projection morphogenesis; chemotaxis]                                                                                                                                                                                                                                                                                                                                                                                                                                                                                                                                                                                                                                                                                                                                                                                                                                                                                                                                                                                                                                                                                                                                                                                                                                                                                                                                                                                                                                                                                                                                                                                                                                                              | snp3dMetastasis, tcgaBreastMethyl, tcgaColonMethyl, tcgaGliomaGE, tcgaOvarianMethyl                                                                   |
| *  | <b>ITGB1</b>  | 10:33189247-33294720<br>10p11.22 | integrin, beta 1 (fibronectin receptor, beta polypeptide, antigen CD29 includes MDF2, MSK12) [Source:HGNC Symbol;Acc:6153], type=nonsense_mediated_decay,processed_transcript,protein_coding,retained_intron, GO=[alpha3-beta1 integrin complex; protein transport within lipid bilayer; alpha9-beta1 integrin complex; hemidesmosome; alpha-actinin binding; cell-cell adhesion mediated by integrin; cellular response to vitamin D; cell migration involved in sprouting angiogenesis; germ cell migration; sarcomere organization; intercalated disc; fibronectin binding; laminin binding; response to gonadotropin stimulus; maternal process involved in female pregnancy; response to transforming growth factor beta stimulus; cellular response to ionizing radiation; integrin complex; cleavage furrow; basal plasma membrane; myelin sheath; tight junction assembly; cell adhesion mediated by integrin; leukocyte cell-cell adhesion; neuromuscular junction; positive regulation of neuron projection development; ruffle membrane; protease binding; response to activity; collagen binding; cardiac muscle cell differentiation; positive regulation of cell-substrate adhesion; cellular response to mechanical stimulus; glycoprotein binding; negative regulation of neuron differentiation; acrosomal vesicle; negative regulation of cell projection organization; positive regulation of neuron differentiation; cellular defense response; cell fate specification; integrin-mediated signaling pathway; cellular response to protein stimulus; B cell differentiation; integrin binding; regulation of G-protein coupled receptor protein signaling pathway; sarcolemma; basement membrane; positive regulation of peptidyl-tyrosine phosphorylation; melanosome; tissue homeostasis; focal adhesion; positive regulation of cell adhesion; synaptosome; positive regulation of cell projection organization; cell-matrix adhesion; positive regulation of MAPKKK cascade; homophilic cell adhesion; adherens junction; membrane raft; B cell activation; response to protein stimulus; positive regulation of cell migration; G1/S transition of mitotic cell cycle; regulation of cell adhesion; peptide binding; leukocyte migration; stored secretory granule; striated muscle tissue development; positive regulation of phosphorylation; cellular calcium ion homeostasis; protein heterodimerization activity; protein kinase binding; in utero embryonic development; positive regulation of intracellular protein kinase cascade; actin binding; cell-cell adhesion; negative regulation of cell differentiation; response to drug; axon guidance; cell surface; negative regulation of cell proliferation; blood coagulation; cell morphogenesis involved in neuron differentiation; positive regulation of apoptosis; neuron projection morphogenesis; chemotaxis; regulation of cell cycle; protein dimerization activity; identical protein binding] | tcgaBreastGE, tcgaBreastMethyl, tcgaColonMethyl, tcgaGliomaCGHd, tcgaGliomaGE, tcgaOvariana, tcgaOvarianMethyl, tcscapBCd, tcscapOvariand, tcscapRCCd |
|    | <b>MTR</b>    | 1:236958581-237067281<br>1q43    | 5-methyltetrahydrofolate-homocysteine methyltransferase [Source:HGNC Symbol;Acc:7468], type=processed_transcript,protein_coding, GO=[methionine synthase activity; homocysteine S-methyltransferase activity; homocysteine metabolic process; cobalamin binding; tetrahydrofolate metabolic process; methionine biosynthetic process; folic acid binding; aspartate family amino acid biosynthetic process; aspartate family amino acid metabolic process; protein methylation; vitamin binding; xenobiotic metabolic process; soluble fraction]                                                                                                                                                                                                                                                                                                                                                                                                                                                                                                                                                                                                                                                                                                                                                                                                                                                                                                                                                                                                                                                                                                                                                                                                                                                                                                                                                                                                                                                                                                                                                                                                                                                                                                                                                                                                                                                                                                                                                                                                                                                                                                                                                                                                                                                                                                                                                                                                                                            | tcgaColonMethyl, tcgaGliomaGE, tcgaOvarianMethyl, tcscapBCa, tcscapBCd, tcscapOvariana, tcscapProstated, tcscapSCLCd                                  |
| d* | <b>NME1</b>   | 17:49230897-49239789<br>17q21.33 | non-metastatic cells 1, protein (NM23A) expressed in [Source:HGNC Symbol;Acc:7849], type=nonsense_mediated_decay,protein_coding,retained_intron, GO=[nucleoside diphosphate kinase activity; nucleoside diphosphate phosphorylation; GTP biosynthetic process; UTP biosynthetic process; CTP biosynthetic process; gamma-tubulin binding; nucleobase, nucleoside and nucleotide interconversion; negative regulation of myeloid leukocyte differentiation; deoxyribonuclease activity; response to cAMP; purine ribonucleoside triphosphate biosynthetic process; positive regulation of epithelial cell proliferation; positive regulation of DNA binding; magnesium ion binding; intermediate filament; centrosome; GTP binding; negative regulation of cell differentiation; response to drug; perinuclear region of cytoplasm; negative regulation of cell proliferation; identical protein binding]                                                                                                                                                                                                                                                                                                                                                                                                                                                                                                                                                                                                                                                                                                                                                                                                                                                                                                                                                                                                                                                                                                                                                                                                                                                                                                                                                                                                                                                                                                                                                                                                                                                                                                                                                                                                                                                                                                                                                                                                                                                                                    | snp3dLungC, snp3dMetastasis, tcgaBreastGE                                                                                                             |
| u  | <b>PROCR</b>  | 20:33758727-33765165<br>20q11.22 | protein C receptor, endothelial [Source:HGNC Symbol;Acc:9452], type=protein_coding, GO=[MHC class I protein complex; antigen processing and presentation; centrosome; blood coagulation]                                                                                                                                                                                                                                                                                                                                                                                                                                                                                                                                                                                                                                                                                                                                                                                                                                                                                                                                                                                                                                                                                                                                                                                                                                                                                                                                                                                                                                                                                                                                                                                                                                                                                                                                                                                                                                                                                                                                                                                                                                                                                                                                                                                                                                                                                                                                                                                                                                                                                                                                                                                                                                                                                                                                                                                                    | tcgaBreastGE, tcgaBreastMethyl, tcgaColonGE, tcgaGliomaGE, tcgaOvarianMethyl                                                                          |
| u  | <b>PTGFRN</b> | 1:117452679-117532980<br>1p13.1  | prostaglandin F2 receptor negative regulator [Source:HGNC Symbol;Acc:9601], type=processed_transcript,protein_coding, GO=[lipid particle organization; endoplasmic reticulum membrane]                                                                                                                                                                                                                                                                                                                                                                                                                                                                                                                                                                                                                                                                                                                                                                                                                                                                                                                                                                                                                                                                                                                                                                                                                                                                                                                                                                                                                                                                                                                                                                                                                                                                                                                                                                                                                                                                                                                                                                                                                                                                                                                                                                                                                                                                                                                                                                                                                                                                                                                                                                                                                                                                                                                                                                                                      | tcgaBreastGE, tcgaBreastMethyl, tcgaColonGE, tcscapNSCLCd, tcscapSCLCa, tcscapSCLCd                                                                   |
| u* | <b>PTPRF</b>  | 1:43990858-44089343<br>1p34.2    | protein tyrosine phosphatase, receptor type, F [Source:HGNC Symbol;Acc:9670], type=processed_transcript,protein_coding, GO=[negative regulation of nerve growth factor receptor signaling pathway; transmembrane receptor protein tyrosine phosphatase signaling pathway; phosphate binding; positive regulation of dendrite morphogenesis; excitatory synapse; transmembrane receptor protein tyrosine phosphatase activity; negative regulation of insulin receptor signaling pathway; negative regulation of cytokine-mediated signaling pathway; receptor tyrosine kinase binding; insulin receptor binding; positive regulation of neuron apoptosis; negative regulation of epidermal growth factor receptor signaling pathway; regulation of synapse structure and activity; negative regulation of cell projection organization; peptidyl-tyrosine dephosphorylation; growth cone; epidermal growth factor receptor signaling pathway; positive regulation of cell projection organization; homophilic cell adhesion; neuronal cell body; microsome; cell-cell adhesion; endosome; negative regulation of cell proliferation; cell morphogenesis involved in neuron differentiation; positive regulation of apoptosis; neuron projection morphogenesis]                                                                                                                                                                                                                                                                                                                                                                                                                                                                                                                                                                                                                                                                                                                                                                                                                                                                                                                                                                                                                                                                                                                                                                                                                                                                                                                                                                                                                                                                                                                                                                                                                                                                                                                              | tcgaBreastMethyl, tcgaColonGE, tcgaOvarianMethyl                                                                                                      |
| u* | <b>TUBA1C</b> | 12:49582519-49667116<br>12q13.12 | tubulin, alpha 1c [Source:HGNC Symbol;Acc:20768], type=nonsense_mediated_decay,processed_transcript,protein_coding,retained_intron, GO=[cytoplasmic microtubule; cytoskeleton-dependent intracellular transport; 'de novo' posttranslational protein folding; 'de novo' protein folding; microtubule-based movement; protein polymerization; GTPase activity; GTP binding; cell division; GTP catabolic process; structural molecule activity]                                                                                                                                                                                                                                                                                                                                                                                                                                                                                                                                                                                                                                                                                                                                                                                                                                                                                                                                                                                                                                                                                                                                                                                                                                                                                                                                                                                                                                                                                                                                                                                                                                                                                                                                                                                                                                                                                                                                                                                                                                                                                                                                                                                                                                                                                                                                                                                                                                                                                                                                              | tcgaBreastGE, tcgaGliomaGE                                                                                                                            |

## 1.2.1 GO enrichment of all candidates

Table 6: Enriched Gene Ontology terms [1] (FDR corrected  $p \leq 0.05$ ). Ratio is the proportion of the annotated genes among the whole gene set. List is sorted based on the FDR corrected p-values. Green and blue borders are referring to up and down regulated genes, respectively.

| Ratio | Type | Description                                                                           | Genes                                                                                                              |
|-------|------|---------------------------------------------------------------------------------------|--------------------------------------------------------------------------------------------------------------------|
| 0.435 | CC   | integral to plasma membrane                                                           | ART3, ATP1B3, BST2, CD97, GPR56, ITGA6, ITGAV, ITGB1, PROCR, PTPRF                                                 |
| 0.182 | BP   | integrin-mediated signaling pathway                                                   | ADAM10, ITGA6, ITGAV, ITGB1                                                                                        |
| 0.739 | CC   | plasma membrane                                                                       | ADAM10, ART3, ATP10A, ATP1B3, BST2, CD109, CD97, CHL1, FASN, GOT2, GPR56, HSPD1, ITGA6, ITGAV, ITGB1, PROCR, PTPRF |
| 0.130 | CC   | integrin complex                                                                      | ITGA6, ITGAV, ITGB1                                                                                                |
| 0.227 | BP   | leukocyte migration                                                                   | ADAM10, ATP1B3, ITGA6, ITGAV, ITGB1                                                                                |
| 0.364 | BP   | cell adhesion                                                                         | ADAM10, CD97, CHL1, GPR56, ITGA6, ITGAV, ITGB1, PTPRF                                                              |
| 0.136 | BP   | aspartate family amino acid metabolic process                                         | ALDH7A1, GOT2, MTR                                                                                                 |
| 0.091 | BP   | aspartate family amino acid catabolic process                                         | ALDH7A1, GOT2                                                                                                      |
| 0.217 | CC   | cell surface                                                                          | ADAM10, HSPD1, ITGA6, ITGAV, ITGB1                                                                                 |
| 0.130 | MF   | integrin binding                                                                      | ADAM10, ITGA6, ITGB1                                                                                               |
| 0.130 | CC   | melanosome                                                                            | ATP1B3, FASN, ITGB1                                                                                                |
| 0.136 | BP   | purine ribonucleoside triphosphate biosynthetic process                               | ATP10A, ATP1B3, NME1                                                                                               |
| 0.182 | BP   | regulation of cell adhesion                                                           | ADAM10, ITGA6, ITGAV, ITGB1                                                                                        |
| 0.091 | BP   | aspartate family amino acid biosynthetic process                                      | GOT2, MTR                                                                                                          |
| 0.136 | BP   | positive regulation of cell adhesion                                                  | ITGA6, ITGAV, ITGB1                                                                                                |
| 0.087 | MF   | laminin binding                                                                       | ITGA6, ITGB1                                                                                                       |
| 0.364 | BP   | cell proliferation                                                                    | ADAM10, BST2, HSPD1, IGSF8, ITGAV, ITGB1, NME1, PTPRF                                                              |
| 0.130 | CC   | anchored to membrane                                                                  | ART3, BST2, CD109                                                                                                  |
| 0.227 | BP   | blood coagulation                                                                     | ATP1B3, ITGA6, ITGAV, ITGB1, PROCR                                                                                 |
| 0.136 | BP   | cell-matrix adhesion                                                                  | ITGA6, ITGAV, ITGB1                                                                                                |
| 0.087 | CC   | basal plasma membrane                                                                 | ITGA6, ITGB1                                                                                                       |
| 0.130 | MF   | vitamin binding                                                                       | FASN, GOT2, MTR                                                                                                    |
| 0.091 | BP   | cell adhesion mediated by integrin                                                    | ITGA6, ITGB1                                                                                                       |
| 0.136 | BP   | ATP metabolic process                                                                 | ATP10A, ATP1B3, HSPD1                                                                                              |
| 0.043 | MF   | 3-hydroxypalmitoyl-[acyl-carrier-protein] dehydratase activity                        | FASN                                                                                                               |
| 0.043 | MF   | 3-oxoacyl-[acyl-carrier-protein] reductase activity                                   | FASN                                                                                                               |
| 0.087 | MF   | ATPase activity, coupled to transmembrane movement of ions, phosphorylative mechanism | ATP10A, ATP1B3                                                                                                     |
| 0.136 | BP   | B cell activation                                                                     | BST2, HSPD1, ITGB1                                                                                                 |
| 0.045 | BP   | B cell cytokine production                                                            | HSPD1                                                                                                              |
| 0.043 | MF   | L-aminoadipate-semialdehyde dehydrogenase activity                                    | ALDH7A1                                                                                                            |
| 0.045 | BP   | T cell mediated immune response to tumor cell                                         | HSPD1                                                                                                              |
| 0.043 | MF   | [acyl-carrier-protein] S-acetyltransferase activity                                   | FASN                                                                                                               |
| 0.043 | CC   | alpha3-beta1 integrin complex                                                         | ITGB1                                                                                                              |
| 0.043 | CC   | alpha6-beta4 integrin complex                                                         | ITGA6                                                                                                              |
| 0.043 | MF   | betaine-aldehyde dehydrogenase activity                                               | ALDH7A1                                                                                                            |
| 0.045 | BP   | constitutive protein ectodomain proteolysis                                           | ADAM10                                                                                                             |
| 0.043 | MF   | enoyl-[acyl-carrier-protein] reductase (NADPH, B-specific) activity                   | FASN                                                                                                               |
| 0.045 | BP   | entry of bacterium into host cell                                                     | ITGAV                                                                                                              |
| 0.045 | BP   | entry of symbiont into host cell by promotion of host phagocytosis                    | ITGAV                                                                                                              |
| 0.261 | CC   | extracellular region part                                                             | CD109, CD97, CHL1, HSPD1, ITGA6, ITGB1                                                                             |
| 0.136 | BP   | lipid transport                                                                       | ATP10A, GOT2, ITGAV                                                                                                |
| 0.043 | MF   | methionine synthase activity                                                          | MTR                                                                                                                |
| 0.364 | BP   | nervous system development                                                            | CHL1, GPR56, IGSF8, ITGAV, ITGB1, MTR, NME1, PTPRF                                                                 |
| 0.045 | BP   | positive regulation of T cell mediated immune response to tumor cell                  | HSPD1                                                                                                              |
| 0.136 | BP   | positive regulation of cell migration                                                 | ADAM10, ITGAV, ITGB1                                                                                               |
| 0.091 | BP   | positive regulation of cell-substrate adhesion                                        | ITGA6, ITGB1                                                                                                       |
| 0.045 | BP   | protein transport within lipid bilayer                                                | ITGB1                                                                                                              |
| 0.045 | BP   | regulation of T cell mediated immune response to tumor cell                           | HSPD1                                                                                                              |
| 0.455 | BP   | response to chemical stimulus                                                         | ADAM10, CHL1, GOT2, HSPD1, ITGA6, ITGAV, ITGB1, MTR, NME1, PTPRF                                                   |
| 0.091 | BP   | 'de novo' protein folding                                                             | HSPD1, TUBA1C                                                                                                      |
| 0.091 | BP   | negative regulation of cell projection organization                                   | ITGB1, PTPRF                                                                                                       |
| 0.043 | MF   | 3-oxoacyl-[acyl-carrier-protein] synthase activity                                    | FASN                                                                                                               |
| 0.043 | MF   | L-aspartate:2-oxoglutarate aminotransferase activity                                  | GOT2                                                                                                               |
| 0.043 | MF   | [acyl-carrier-protein] S-malonyltransferase activity                                  | FASN                                                                                                               |
| 0.043 | CC   | alpha9-beta1 integrin complex                                                         | ITGB1                                                                                                              |
| 0.043 | MF   | myristoyl-[acyl-carrier-protein] hydrolase activity                                   | FASN                                                                                                               |
| 0.043 | MF   | oleoyl-[acyl-carrier-protein] hydrolase activity                                      | FASN                                                                                                               |
| 0.043 | MF   | palmitoyl-[acyl-carrier-protein] hydrolase activity                                   | FASN                                                                                                               |
| 0.045 | BP   | aspartate biosynthetic process                                                        | GOT2                                                                                                               |
| 0.045 | BP   | glutamate catabolic process to 2-oxoglutarate                                         | GOT2                                                                                                               |
| 0.045 | BP   | glutamate catabolic process to aspartate                                              | GOT2                                                                                                               |
| 0.045 | BP   | regulation of apoptotic cell clearance                                                | ITGAV                                                                                                              |
| 0.318 | BP   | response to organic substance                                                         | ADAM10, GOT2, HSPD1, ITGA6, ITGB1, NME1, PTPRF                                                                     |

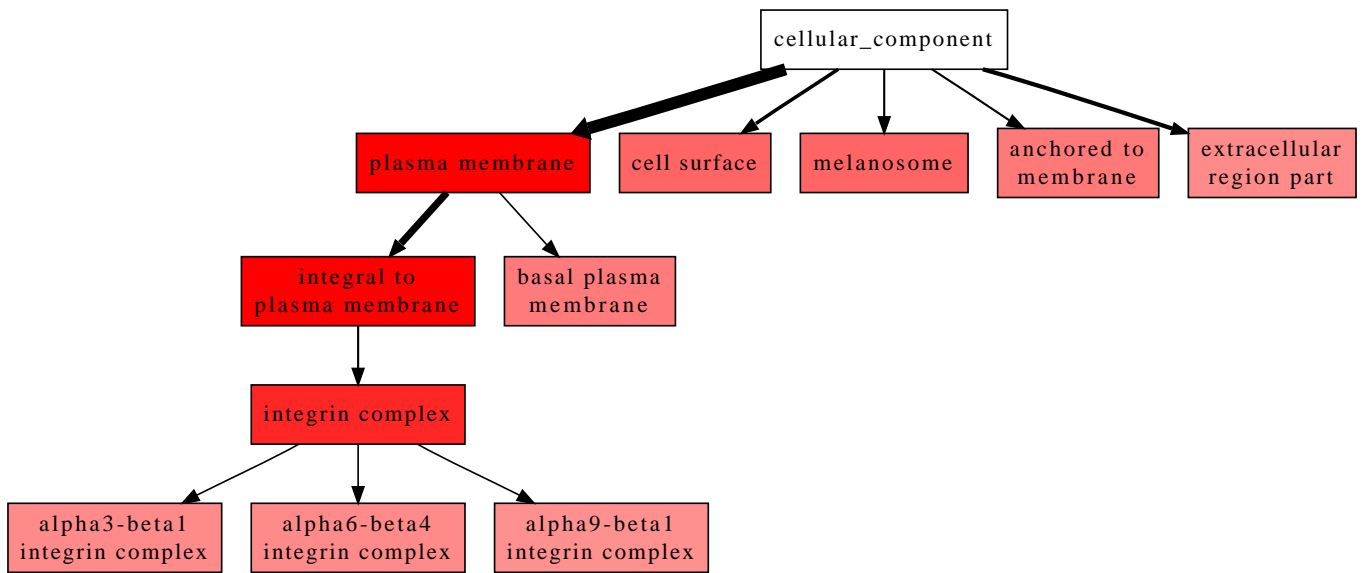

Figure 5: Relationships between the enriched *cellular component* Gene Ontology terms that were listed in Table 6. The darkness of the red reflects the significance of the enrichment and the thicknesses of the edges are proportional to the numbers of genes sharing the following annotation.

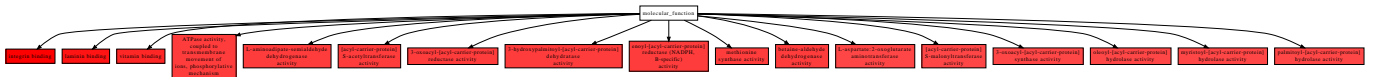

Figure 6: Relationships between the enriched *molecular function* Gene Ontology terms that were listed in Table 6. The darkness of the red reflects the significance of the enrichment and the thicknesses of the edges are proportional to the numbers of genes sharing the following annotation.

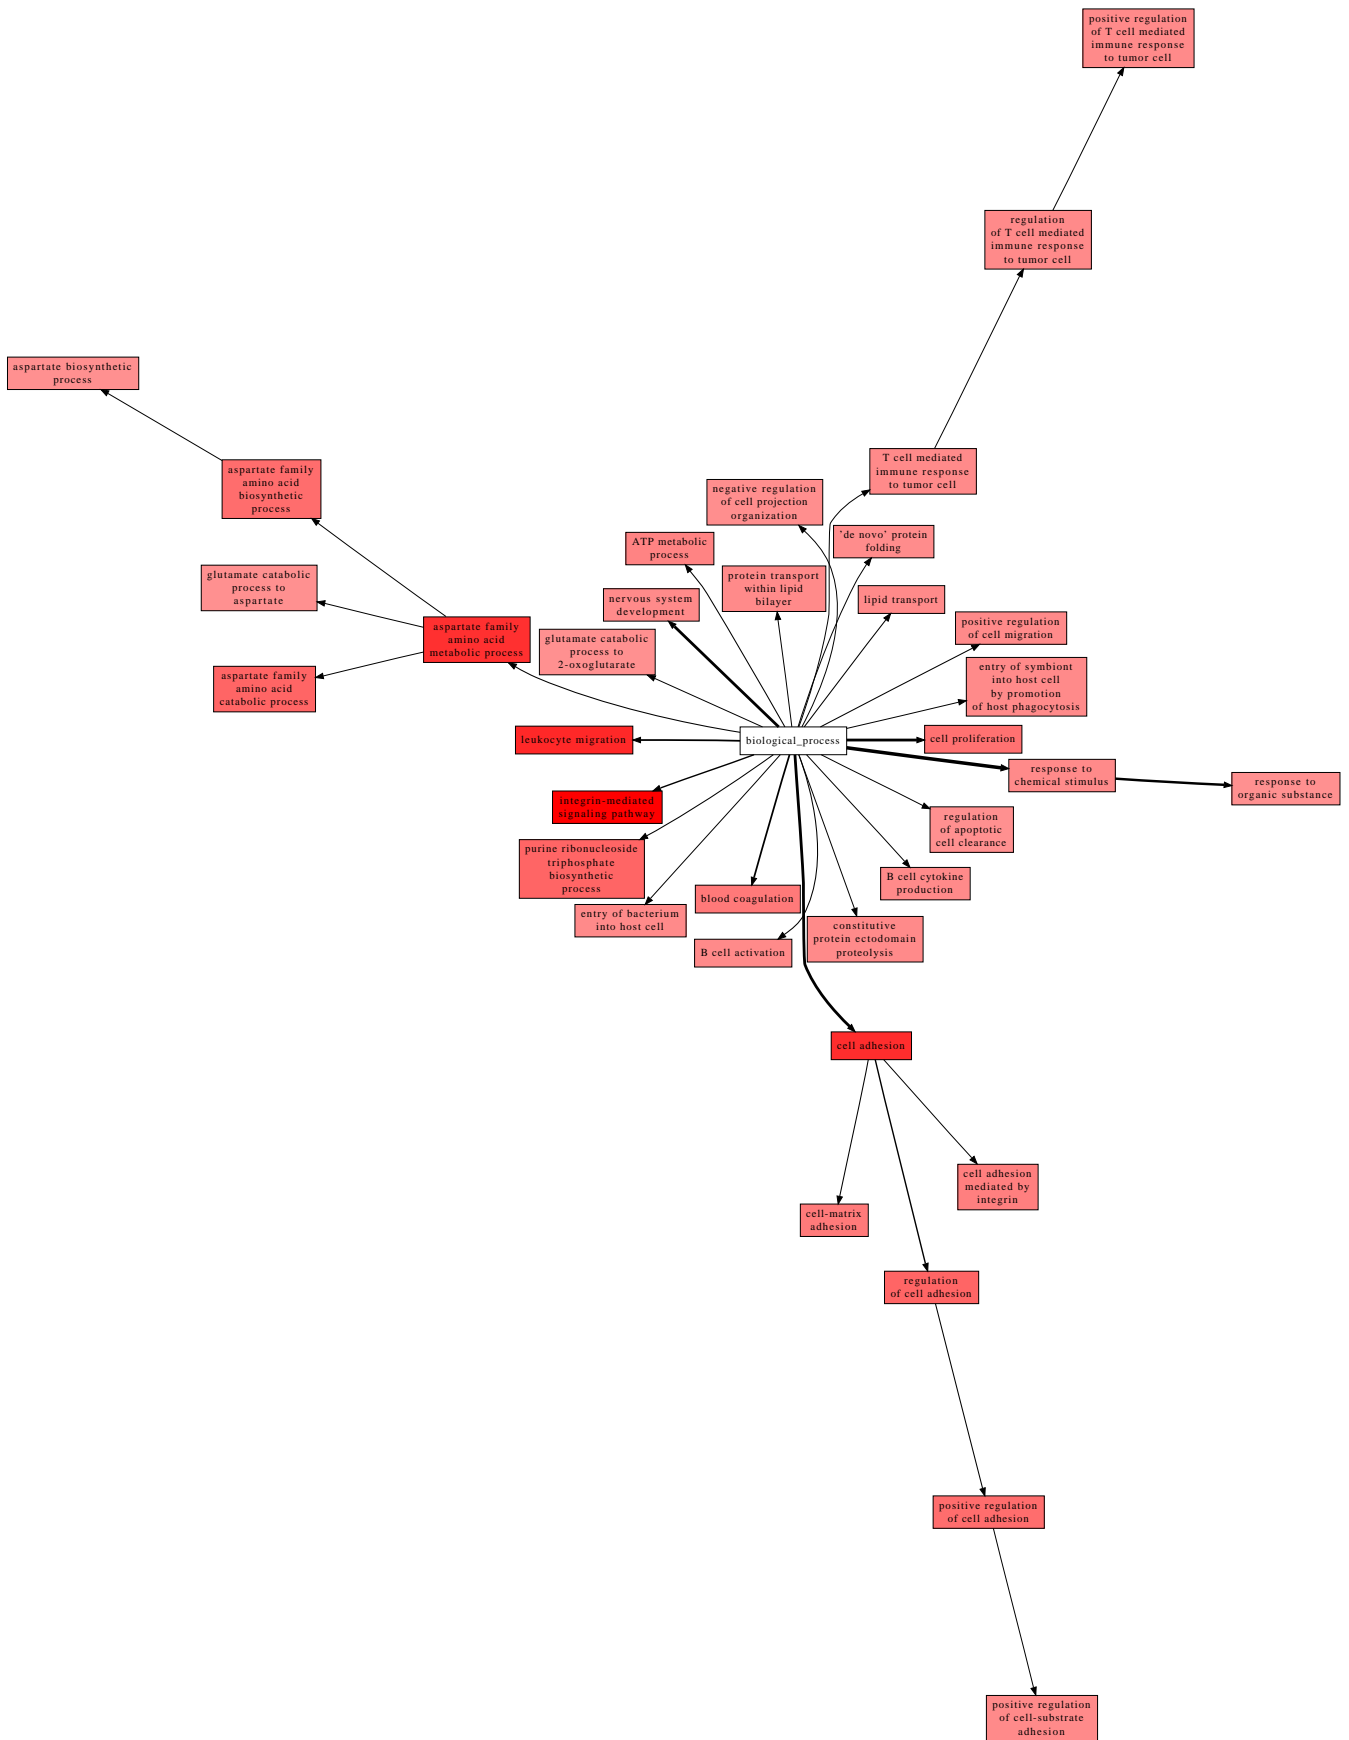

Figure 7: Relationships between the enriched *biological process* Gene Ontology terms that were listed in Table 6. The darkness of the red reflects the significance of the enrichment and the thicknesses of the edges are proportional to the numbers of genes sharing the following annotation.

## 2 Candidate report for the proteins interactions

### 2.1 Moksiskan candidate pathway

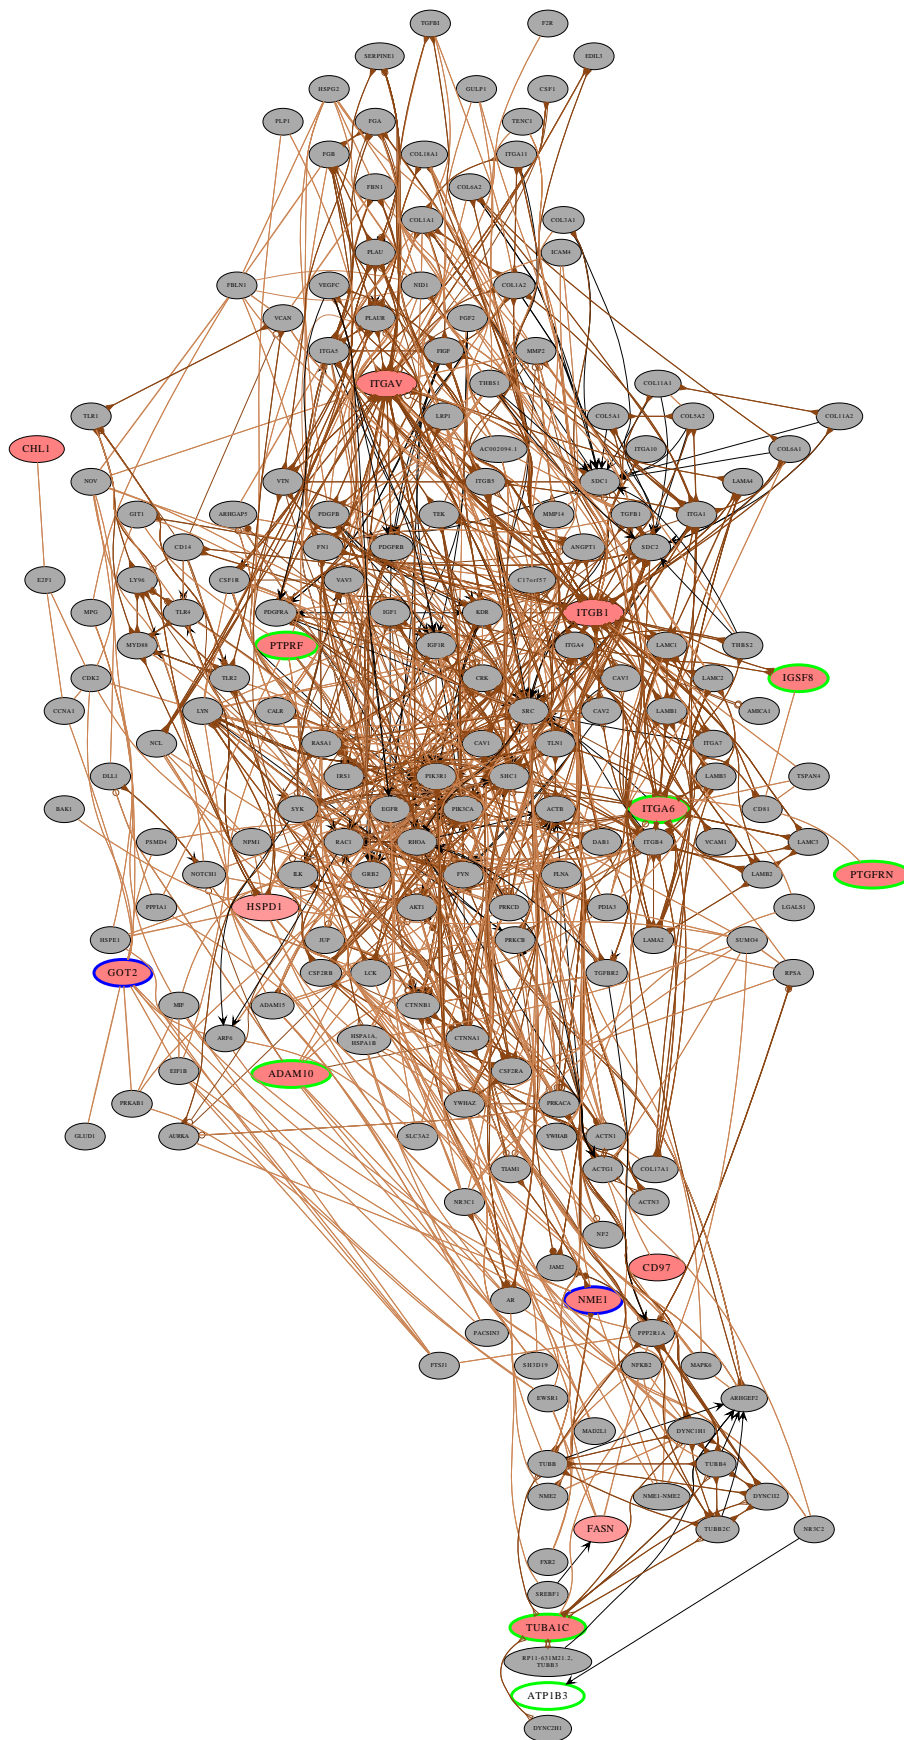



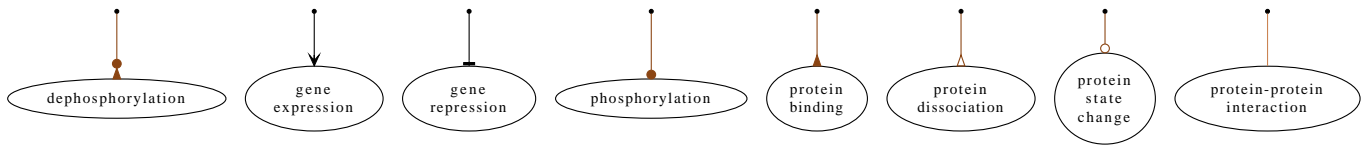

Figure 8: Known relationships between the candidate genes. Candidate genes are shown in red if they have only output connections. The ratio of input and output connections determines how light they are. Completely white genes have only input connections. The network of candidate genes is expanded by fetching related genes 1 step(s) to up and down stream. The related genes are shown on gray. Green and blue borders are referring to **up** and **down** regulated genes, respectively. Light grey is used to emphasize *stably* expressed genes. Known regulations are shown with bold borders whereas the predictions are kept thin.

 You may use this [Cytoscape](#) session to browse the candidate pathway graph interactively.

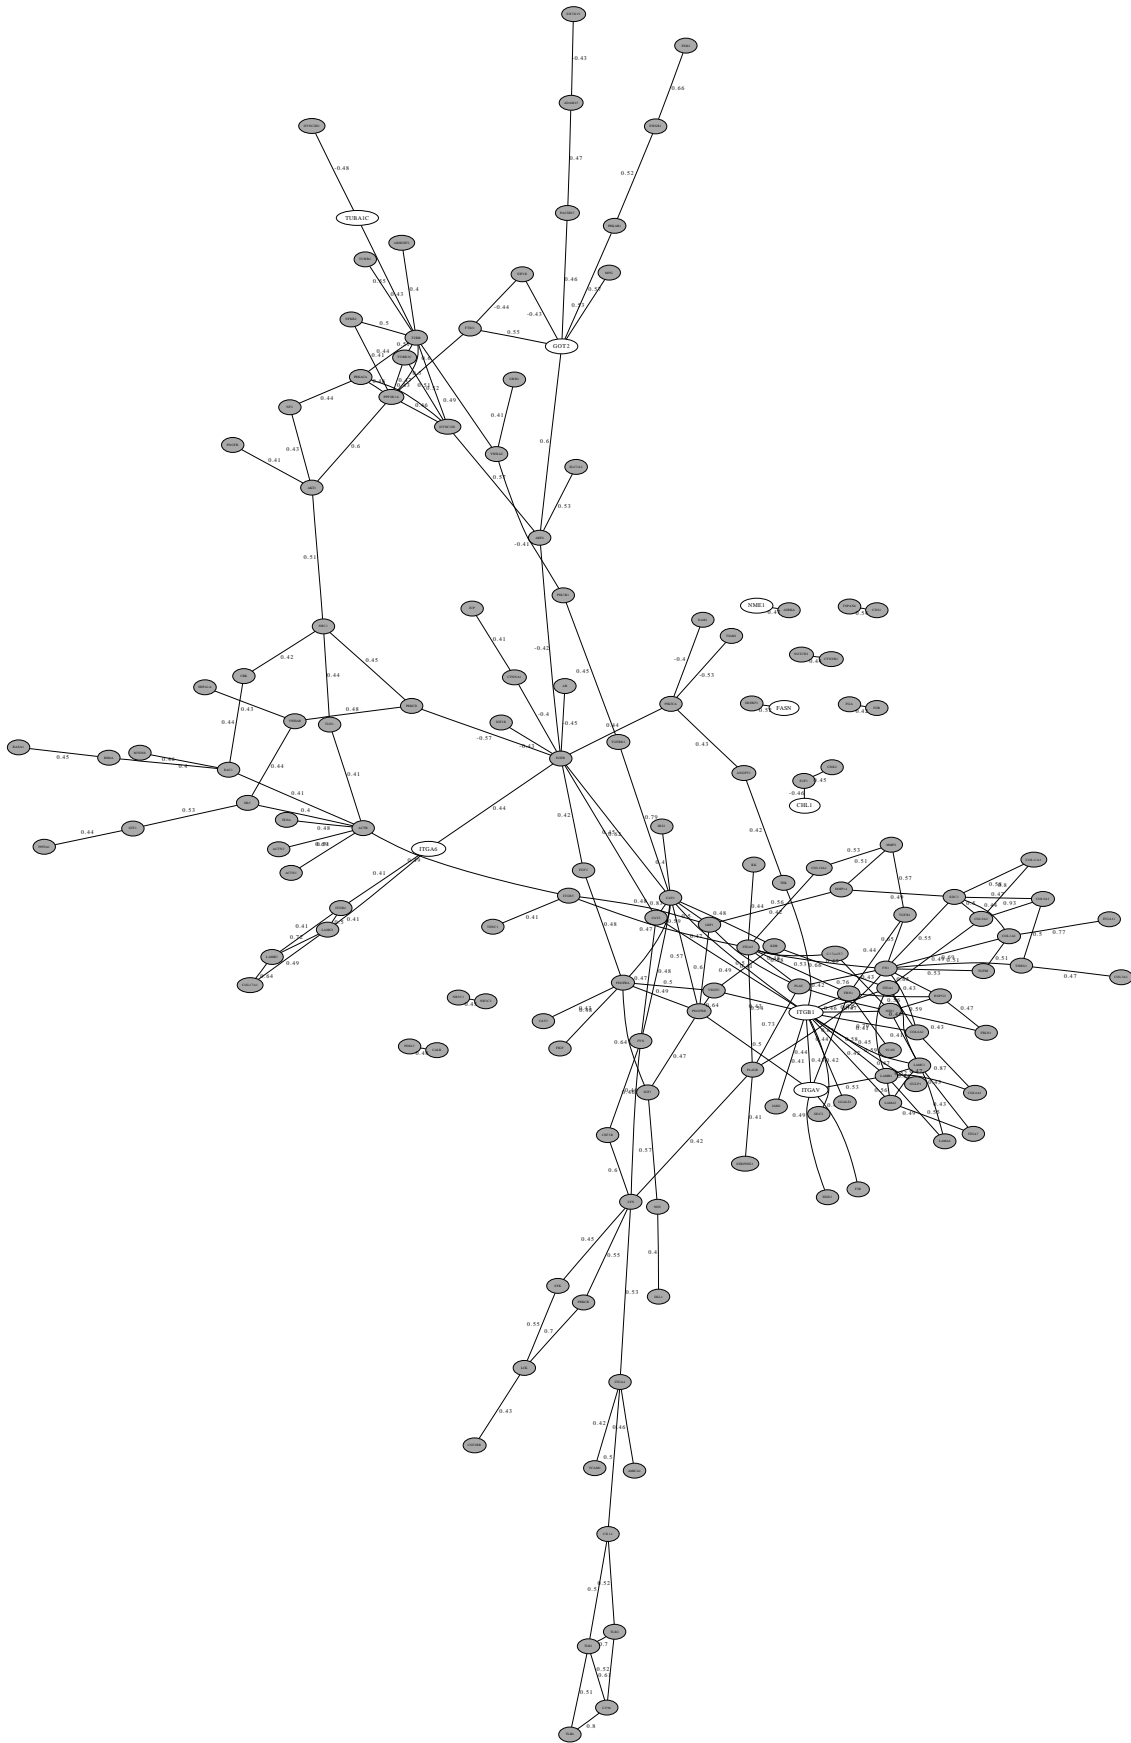

Figure 9: Observed correlations for the candidate pathway (Figure 8).

Table 7: Descriptions of the intermediated genes between the candidate genes. This table has 175 rows.

| name       | description                                                                                                                                   |
|------------|-----------------------------------------------------------------------------------------------------------------------------------------------|
| AC002094.1 | Vitronectin Vitronectin V65 subunit Vitronectin V10 subunit Somatomedin-B [Source:UniProtKB/Swiss-Prot;Acc:P04004] locus=17:26694297-26700110 |
| ACTB       | actin, beta [Source:HGNC Symbol;Acc:132] locus=7:5566782-5603415                                                                              |
| ACTG1      | actin, gamma 1 [Source:HGNC Symbol;Acc:144] locus=17:79476999-79479827                                                                        |
| ACTN1      | actinin, alpha 1 [Source:HGNC Symbol;Acc:163] locus=14:69340860-69446157                                                                      |

Continued on next page...

| <b>name</b>     | <b>description</b>                                                                                                                              |
|-----------------|-------------------------------------------------------------------------------------------------------------------------------------------------|
| <b>ACTN3</b>    | actinin, alpha 3 [Source:HGNC Symbol;Acc:165] locus=11:66313866-66330800                                                                        |
| <b>ADAM15</b>   | ADAM metalloproteinase domain 15 [Source:HGNC Symbol;Acc:193] locus=1:155023042-155035252                                                       |
| <b>AKT1</b>     | v-akt murine thymoma viral oncogene homolog 1 [Source:HGNC Symbol;Acc:391] locus=14:105235686-105262088                                         |
| <b>AMICA1</b>   | adhesion molecule, interacts with CXADR antigen 1 [Source:HGNC Symbol;Acc:19084] locus=11:118064455-118095809                                   |
| <b>ANGPT1</b>   | angiopoietin 1 [Source:HGNC Symbol;Acc:484] locus=8:108261721-108510283                                                                         |
| <b>AR</b>       | androgen receptor [Source:HGNC Symbol;Acc:644] locus=X:66763874-66950461                                                                        |
| <b>ARF6</b>     | Rho-guanine nucleotide exchange factor 6 [Source:HGNC Symbol;Acc:659] locus=14:50359810-50361490                                                |
| <b>ARRHGAP5</b> | Rho GTPase activating protein 5 [Source:HGNC Symbol;Acc:675] locus=14:32545320-32628934                                                         |
| <b>ARRHF2</b>   | Rho/Rac guanine nucleotide exchange factor (GEF) 2 [Source:HGNC Symbol;Acc:682] locus=1:155916645-155966129                                     |
| <b>AURKA</b>    | aurora kinase A [Source:HGNC Symbol;Acc:11939] locus=20:54944445-54967393                                                                       |
| <b>BAK1</b>     | BCL2-antagonist/killer 1 [Source:HGNC Symbol;Acc:949] locus=6:33540324-33548070                                                                 |
| <b>C17orf57</b> | chromosome 17 open reading frame 57 [Source:HGNC Symbol;Acc:26864] locus=17:45331208-45518678                                                   |
| <b>CALR</b>     | calreticulin [Source:HGNC Symbol;Acc:1455] locus=19:13049414-13055304                                                                           |
| <b>CAV1</b>     | caveolin 1, caveoleae protein, 22kDa [Source:HGNC Symbol;Acc:1527] locus=7:116164839-116201233                                                  |
| <b>CAV2</b>     | caveolin 2 [Source:HGNC Symbol;Acc:1528] locus=7:115927434-116148595                                                                            |
| <b>CAV3</b>     | caveolin 3 [Source:HGNC Symbol;Acc:1529] locus=3:8775486-8883492                                                                                |
| <b>CCNA1</b>    | cyclin A1 [Source:HGNC Symbol;Acc:1577] locus=13:37005967-37017019                                                                              |
| <b>CD14</b>     | CD14 molecule [Source:HGNC Symbol;Acc:1628] locus=5:140011313-140013286                                                                         |
| <b>CD81</b>     | CD81 molecule [Source:HGNC Symbol;Acc:1701] locus=11:2397407-2418627                                                                            |
| <b>CDK2</b>     | cyclin-dependent kinase 2 [Source:HGNC Symbol;Acc:1771] locus=12:56360553-56366568                                                              |
| <b>COL11A1</b>  | collagen, type XI, alpha 1 [Source:HGNC Symbol;Acc:2186] locus=1:103342023-103574052                                                            |
| <b>COL11A2</b>  | collagen, type XI, alpha 2 [Source:HGNC Symbol;Acc:2187] locus=6:33130458-33160276                                                              |
| <b>COL17A1</b>  | collagen, type XVII, alpha 1 [Source:HGNC Symbol;Acc:2194] locus=10:105791044-105845760                                                         |
| <b>COL18A1</b>  | collagen, type XVIII, alpha 1 [Source:HGNC Symbol;Acc:2195] locus=21:46825052-46933634                                                          |
| <b>COL1A1</b>   | collagen, type I, alpha 1 [Source:HGNC Symbol;Acc:2197] locus=17:48260650-48278993                                                              |
| <b>COL1A2</b>   | collagen, type I, alpha 2 [Source:HGNC Symbol;Acc:2198] locus=7:94023873-94060544                                                               |
| <b>COL3A1</b>   | collagen, type III, alpha 1 [Source:HGNC Symbol;Acc:2201] locus=2:189839046-189877472                                                           |
| <b>COL5A1</b>   | collagen, type V, alpha 1 [Source:HGNC Symbol;Acc:2209] locus=9:137533620-137736686                                                             |
| <b>COL5A2</b>   | collagen, type V, alpha 2 [Source:HGNC Symbol;Acc:2210] locus=2:189896622-190044605                                                             |
| <b>COL6A1</b>   | collagen, type VI, alpha 1 [Source:HGNC Symbol;Acc:2211] locus=21:47401651-47424964                                                             |
| <b>COL6A2</b>   | collagen, type VI, alpha 2 [Source:HGNC Symbol;Acc:2212] locus=21:47518011-47552763                                                             |
| <b>CRK</b>      | v-ck sarcoma virus CT10 oncogene homolog (avian) [Source:HGNC Symbol;Acc:2362] locus=17:1323983-1359552                                         |
| <b>CSF1</b>     | colony stimulating factor 1 (macrophage) [Source:HGNC Symbol;Acc:2432] locus=1:110452864-110473614                                              |
| <b>CSF1R</b>    | colony stimulating factor 1 receptor [Source:HGNC Symbol;Acc:2433] locus=5:149432854-149492935                                                  |
| <b>CSF2RA</b>   | colony stimulating factor 2 receptor, alpha, low-affinity (granulocyte-macrophage) [Source:HGNC Symbol;Acc:2435] locus=X:1387693-1429274        |
| <b>CSF2RB</b>   | colony stimulating factor 2 receptor, beta, low-affinity (granulocyte-macrophage) [Source:HGNC Symbol;Acc:2436] locus=22:37309670-37336491      |
| <b>CTNNA1</b>   | catenin (cadherin-associated protein), alpha 1, 102kDa [Source:HGNC Symbol;Acc:2509] locus=5:137946656-138270723                                |
| <b>CTNNB1</b>   | catenin (cadherin-associated protein), beta 1, 88kDa [Source:HGNC Symbol;Acc:2514] locus=3:41236328-41301587                                    |
| <b>DAB1</b>     | disabled homolog 1 (Drosophila) [Source:HGNC Symbol;Acc:2661] locus=1:57460451-59012406                                                         |
| <b>DLL1</b>     | delta-like 1 (Drosophila) [Source:HGNC Symbol;Acc:2908] locus=6:170591294-170599561                                                             |
| <b>DYNC1H1</b>  | dynein, cytoplasmic 1, heavy chain 1 [Source:HGNC Symbol;Acc:2961] locus=14:102430865-102517129                                                 |
| <b>DYNC1I2</b>  | dynein, cytoplasmic 1, intermediate chain 2 [Source:HGNC Symbol;Acc:2964] locus=2:172543919-172604930                                           |
| <b>DYNC2H1</b>  | dynein, cytoplasmic 2, heavy chain 1 [Source:HGNC Symbol;Acc:2962] locus=11:102980160-103350591                                                 |
| <b>E2F1</b>     | E2F transcription factor 1 [Source:HGNC Symbol;Acc:3113] locus=20:32263489-32274210                                                             |
| <b>EDIL3</b>    | EGF-like repeats and discoidin I-like domains 3 [Source:HGNC Symbol;Acc:3173] locus=5:83236373-83680611                                         |
| <b>EGFR</b>     | epidermal growth factor receptor [Source:HGNC Symbol;Acc:3236] locus=7:55086714-55324313                                                        |
| <b>EIF1B</b>    | eukaryotic translation initiation factor 1B [Source:HGNC Symbol;Acc:30792] locus=3:40351175-40353915                                            |
| <b>EWRSR1</b>   | Ewing sarcoma breakpoint region 1 [Source:HGNC Symbol;Acc:3508] locus=22:29663998-29696515                                                      |
| <b>F2R</b>      | coagulation factor II (thrombin) receptor [Source:HGNC Symbol;Acc:3537] locus=5:76011868-76031606                                               |
| <b>FBLN1</b>    | fibulin 1 [Source:HGNC Symbol;Acc:3600] locus=22:45898118-45997015                                                                              |
| <b>FBN1</b>     | fibronectin 1 [Source:HGNC Symbol;Acc:3603] locus=15:48700503-48937985                                                                          |
| <b>FGA</b>      | fibrinogen alpha chain [Source:HGNC Symbol;Acc:3661] locus=4:155504278-155511918                                                                |
| <b>FGB</b>      | fibrinogen beta chain [Source:HGNC Symbol;Acc:3662] locus=4:155484108-155492238                                                                 |
| <b>FGF2</b>     | fibroblast growth factor 2 (basic) [Source:HGNC Symbol;Acc:3676] locus=4:123747863-123819391                                                    |
| <b>FGF4</b>     | c-fos induced growth factor (vascular endothelial growth factor D) [Source:HGNC Symbol;Acc:3708] locus=X:15363713-15402498                      |
| <b>FN1</b>      | filamin A, alpha [Source:HGNC Symbol;Acc:3754] locus=X:153576892-153603006                                                                      |
| <b>FN3</b>      | fibronectin 3 [Source:HGNC Symbol;Acc:3778] locus=2:216225163-216300895                                                                         |
| <b>FTSJ1</b>    | FtsJ homolog 1 (E. coli) [Source:HGNC Symbol;Acc:13254] locus=X:48334541-48344752                                                               |
| <b>FXR2</b>     | fragile X mental retardation, autosomal homolog 2 [Source:HGNC Symbol;Acc:4024] locus=17:17494548-17518215                                      |
| <b>FYN</b>      | FYN oncogene related to SRC, FGR, YES [Source:HGNC Symbol;Acc:4037] locus=6:111981535-112194655                                                 |
| <b>GIT1</b>     | G protein-coupled receptor kinase interacting ArGAP 1 [Source:HGNC Symbol;Acc:4272] locus=17:27900487-27916645                                  |
| <b>GLUD1</b>    | glutamate dehydrogenase 1 [Source:HGNC Symbol;Acc:4335] locus=10:88810243-88854627                                                              |
| <b>GRB2</b>     | growth factor receptor-bound protein 2 [Source:HGNC Symbol;Acc:4566] locus=17:73314157-73401790                                                 |
| <b>GULP1</b>    | GULP, engulfment adaptor PTB domain containing 1 [Source:HGNC Symbol;Acc:18649] locus=2:189156396-189460653                                     |
| <b>HSPA1A</b>   | heat shock 70kDa protein 1A [Source:HGNC Symbol;Acc:5232] locus=6:31783291-31785723                                                             |
| <b>HSPA1B</b>   | heat shock 70kDa protein 1B [Source:HGNC Symbol;Acc:5233] locus=6:31795512-31798031                                                             |
| <b>HSP61</b>    | heat shock 10kDa protein 1 (chaperonin 10) [Source:HGNC Symbol;Acc:5269] locus=2:198364718-198368181                                            |
| <b>HSPG2</b>    | heparan sulfate proteoglycan 2 [Source:HGNC Symbol;Acc:5273] locus=1:22148738-22263790                                                          |
| <b>ICAM4</b>    | intercellular adhesion molecule 4 (Landsteiner-Wiener blood group) [Source:HGNC Symbol;Acc:5347] locus=19:10397650-10399198                     |
| <b>IGF1</b>     | insulin-like growth factor 1 (somatomedin C) [Source:HGNC Symbol;Acc:5464] locus=12:102789645-102874423                                         |
| <b>IGF1R</b>    | insulin-like growth factor 1 receptor [Source:HGNC Symbol;Acc:5465] locus=15:99192200-99507759                                                  |
| <b>ILK</b>      | integrin-linked kinase [Source:HGNC Symbol;Acc:6040] locus=11:6624961-6632102                                                                   |
| <b>IRS1</b>     | insulin receptor substrate 1 [Source:HGNC Symbol;Acc:6125] locus=2:227599757-227664475                                                          |
| <b>ITGA1</b>    | integrin, alpha 1 [Source:HGNC Symbol;Acc:6134] locus=5:52083730-52252327                                                                       |
| <b>ITGA10</b>   | integrin, alpha 10 [Source:HGNC Symbol;Acc:6135] locus=1:145524891-145543868                                                                    |
| <b>ITGA11</b>   | integrin, alpha 11 [Source:HGNC Symbol;Acc:6136] locus=15:68594050-68724502                                                                     |
| <b>ITGA4</b>    | integrin, alpha 4 (antigen CD49D, alpha 4 subunit of VLA-4 receptor) [Source:HGNC Symbol;Acc:6140] locus=2:182321619-182400914                  |
| <b>ITGA5</b>    | integrin, alpha 5 (fibronectin receptor, alpha polypeptide) [Source:HGNC Symbol;Acc:6141] locus=12:54789045-54813244                            |
| <b>ITGA7</b>    | integrin, alpha 7 [Source:HGNC Symbol;Acc:6143] locus=12:56078352-56109827                                                                      |
| <b>ITGB4</b>    | integrin, beta 4 [Source:HGNC Symbol;Acc:6158] locus=17:73713474-73753898                                                                       |
| <b>ITGB5</b>    | integrin, beta 5 [Source:HGNC Symbol;Acc:6160] locus=3:124480795-124606674                                                                      |
| <b>JAM2</b>     | junctional adhesion molecule 2 [Source:HGNC Symbol;Acc:14686] locus=21:27011584-27089874                                                        |
| <b>JUP</b>      | junction plakoglobin [Source:HGNC Symbol;Acc:6207] locus=17:39775692-39943183                                                                   |
| <b>KDR</b>      | kinase insert domain receptor (a type III receptor tyrosine kinase) [Source:HGNC Symbol;Acc:6307] locus=4:55944644-55991756                     |
| <b>LAMA2</b>    | laminin, alpha 2 [Source:HGNC Symbol;Acc:6482] locus=6:129204286-129837714                                                                      |
| <b>LAMA4</b>    | laminin, alpha 4 [Source:HGNC Symbol;Acc:6484] locus=6:112429963-112576141                                                                      |
| <b>LAMB1</b>    | laminin, beta 1 [Source:HGNC Symbol;Acc:6486] locus=7:107564244-107643700                                                                       |
| <b>LAMB2</b>    | laminin, beta 2 (laminin S) [Source:HGNC Symbol;Acc:6487] locus=3:49158547-49170551                                                             |
| <b>LAMB3</b>    | laminin, beta 3 [Source:HGNC Symbol;Acc:6490] locus=1:209788220-209825811                                                                       |
| <b>LAMC1</b>    | laminin, gamma 1 (formerly LAMB2) [Source:HGNC Symbol;Acc:6492] locus=1:182992597-183114727                                                     |
| <b>LAMC2</b>    | laminin, gamma 2 [Source:HGNC Symbol;Acc:6493] locus=1:183155373-183214035                                                                      |
| <b>LAMC3</b>    | laminin, gamma 3 [Source:HGNC Symbol;Acc:6494] locus=9:133884469-133969860                                                                      |
| <b>LCK</b>      | lymphocyte-specific protein tyrosine kinase [Source:HGNC Symbol;Acc:6524] locus=1:32716840-32751766                                             |
| <b>LGALS1</b>   | lectin, galactoside-binding, soluble, 1 [Source:HGNC Symbol;Acc:6561] locus=22:38071615-38075813                                                |
| <b>LRP1</b>     | low density lipoprotein receptor-related protein 1 [Source:HGNC Symbol;Acc:6692] locus=12:57522276-57607134                                     |
| <b>LY96</b>     | lymphocyte antigen 96 [Source:HGNC Symbol;Acc:17156] locus=8:74903587-74941322                                                                  |
| <b>LYN</b>      | v-yes-1 Yamaguchi sarcoma viral related oncogene homolog [Source:HGNC Symbol;Acc:6735] locus=8:56792372-56923939                                |
| <b>MAD2L1</b>   | MAD2 mitotic arrest deficient-like 1 (yeast) [Source:HGNC Symbol;Acc:6763] locus=4:120980577-120988229                                          |
| <b>MAPK6</b>    | mitogen-activated protein kinase 6 [Source:HGNC Symbol;Acc:6879] locus=15:52311417-52358462                                                     |
| <b>MIF</b>      | macrophage migration inhibitory factor (glycosylation-inhibiting factor) [Source:HGNC Symbol;Acc:7097] locus=22:24236191-24237414               |
| <b>MMP14</b>    | matrix metalloproteinase 14 (membrane-inserted) [Source:HGNC Symbol;Acc:7160] locus=14:23305766-23318236                                        |
| <b>MMP2</b>     | matrix metalloproteinase 2 (gelatinase A, 72kDa gelatinase, 72kDa type IV collagenase) [Source:HGNC Symbol;Acc:7166] locus=16:55512883-55540603 |
| <b>MPG</b>      | N-methylpurine-DNA glycosylase [Source:HGNC Symbol;Acc:7211] locus=16:127006-135852                                                             |
| <b>MYD88</b>    | myeloid differentiation primary response gene (88) [Source:HGNC Symbol;Acc:7562] locus=3:38179969-38184513                                      |
| <b>NCL</b>      | neuroligin [Source:HGNC Symbol;Acc:7667] locus=2:232318242-232348352                                                                            |
| <b>NF2</b>      | neurofibromin 2 (merlin) [Source:HGNC Symbol;Acc:7773] locus=22:29999545-30094587                                                               |
| <b>NFKB2</b>    | nuclear factor of kappa light polypeptide gene enhancer in B-cells 2 (p49/p100) [Source:HGNC Symbol;Acc:7795] locus=10:104154229-104162281      |
| <b>NID1</b>     | nidogen 1 [Source:HGNC Symbol;Acc:7821] locus=1:236139130-236228462                                                                             |
| <b>NME1</b>     | NME1-NME2 readthrough [Source:HGNC Symbol;Acc:33531] locus=17:49230951-49249105                                                                 |
| <b>NME2</b>     | NME1-NME2 readthrough [Source:HGNC Symbol;Acc:33531] locus=17:49230951-49249105                                                                 |
| <b>NME2</b>     | non-metastatic cells 2, protein (NM2B) expressed in [Source:HGNC Symbol;Acc:7850] locus=17:49230920-49249108                                    |
| <b>NOTCH1</b>   | notch 1 [Source:HGNC Symbol;Acc:7881] locus=9:13938896-139440314                                                                                |
| <b>NOV</b>      | nephroblastoma overexpressed gene [Source:HGNC Symbol;Acc:7885] locus=8:120428546-120436593                                                     |
| <b>NPM</b>      | nucleophosmin (nucleolar phosphoprotein B23, numatrin) [Source:HGNC Symbol;Acc:7910] locus=5:170814120-170838141                                |
| <b>NR3C1</b>    | nuclear receptor subfamily 3, group C, member 1 (glucocorticoid receptor) [Source:HGNC Symbol;Acc:7978] locus=5:142657496-142815077             |
| <b>NR3C2</b>    | nuclear receptor subfamily 3, group C, member 2 [Source:HGNC Symbol;Acc:7979] locus=4:14899913-149365850                                        |
| <b>PACSN3</b>   | protein kinase C and casein kinase substrate in neurons 3 [Source:HGNC Symbol;Acc:8572] locus=11:47199076-47207994                              |
| <b>PDGFB</b>    | platelet-derived growth factor beta polypeptide [Source:HGNC Symbol;Acc:8800] locus=22:39619364-39640756                                        |
| <b>PDGFRA</b>   | platelet-derived growth factor receptor, alpha polypeptide [Source:HGNC Symbol;Acc:8803] locus=4:55095264-55164414                              |
| <b>PDGFRB</b>   | platelet-derived growth factor receptor, beta polypeptide [Source:HGNC Symbol;Acc:8804] locus=5:149493400-149535423                             |
| <b>PDIA3</b>    | protein disulfide isomerase family A, member 3 [Source:HGNC Symbol;Acc:4606] locus=15:44038590-44065477                                         |
| <b>PIK3CA</b>   | phosphoinositide-3-kinase, catalytic, alpha polypeptide [Source:HGNC Symbol;Acc:8975] locus=3:178865902-178957881                               |
| <b>PIK3R1</b>   | phosphoinositide-3-kinase, regulatory subunit 1 (alpha) [Source:HGNC Symbol;Acc:8979] locus=5:67511548-67597649                                 |
| <b>PLAU</b>     | plasminogen activator, urokinase [Source:HGNC Symbol;Acc:9052] locus=10:75668935-75677255                                                       |

Continued on next page. . .

| name          | description                                                                                                                                                        |
|---------------|--------------------------------------------------------------------------------------------------------------------------------------------------------------------|
| PLAUR         | plasminogen activator, urokinase receptor [Source:HGNC Symbol;Acc:9053] locus=19:44150271-44174502                                                                 |
| PLP1          | proteolipid protein 1 [Source:HGNC Symbol;Acc:9086] locus=X:103028647-103047548                                                                                    |
| PPFIA1        | protein tyrosine phosphatase, receptor type, f polypeptide (PTPRF), interacting protein (liprin), alpha 1 [Source:HGNC Symbol;Acc:9245] locus=11:70116806-70230509 |
| PPP2R1A       | protein phosphatase 2, regulatory subunit A, alpha [Source:HGNC Symbol;Acc:9302] locus=19:52693274-52730687                                                        |
| PRKAB1        | protein kinase, AMP-activated, beta 1 non-catalytic subunit [Source:HGNC Symbol;Acc:9378] locus=12:120105558-120119435                                             |
| PRKACA        | protein kinase, cAMP-dependent, catalytic, alpha [Source:HGNC Symbol;Acc:9380] locus=19:14202509-14228574                                                          |
| PRKCB         | protein kinase C, beta [Source:HGNC Symbol;Acc:9395] locus=16:23847322-24231932                                                                                    |
| PRKCD         | protein kinase C, delta [Source:HGNC Symbol;Acc:9399] locus=3:53190025-53226733                                                                                    |
| PSMD4         | proteasome (prosome, macropain) 26S subunit, non-ATPase, 4 [Source:HGNC Symbol;Acc:9561] locus=1:151227179-151239955                                               |
| RAC1          | ras-related C3 botulinum toxin substrate 1 (rho family, small GTP binding protein Rac1) [Source:HGNC Symbol;Acc:9801] locus=7:64414154-6443608                     |
| RASA1         | RAS p21 protein activator (GTPase activating protein) 1 [Source:HGNC Symbol;Acc:9871] locus=5:86563705-86688145                                                    |
| RHOA          | ras homolog gene family, member A [Source:HGNC Symbol;Acc:667] locus=3:49396578-49450431                                                                           |
| RP11-631M21.2 | Tubulin beta-8 chain [Source:UniProtKB/Swiss-Prot;Acc:Q3ZCM7] locus=10:92828-96053                                                                                 |
| RPSA          | ribosomal protein SA [Source:HGNC Symbol;Acc:6502] locus=3:39448180-39453929                                                                                       |
| SDC1          | syndecan 1 [Source:HGNC Symbol;Acc:10658] locus=2:20400558-20425194                                                                                                |
| SDC2          | syndecan 2 [Source:HGNC Symbol;Acc:10659] locus=8:97505579-97624000                                                                                                |
| SERPINE1      | serpin peptidase inhibitor, clade E (nexin, plasminogen activator inhibitor type 1), member 1 [Source:HGNC Symbol;Acc:8583] locus=7:100770370-100782547            |
| SH3D19        | SH3 domain containing 19 [Source:HGNC Symbol;Acc:30418] locus=4:152041431-152149182                                                                                |
| SHC1          | SHC (Src homology 2 domain containing) transforming protein 1 [Source:HGNC Symbol;Acc:10840] locus=1:154934774-154946871                                           |
| SLC3A2        | solute carrier family 3 (activators of dibasic and neutral amino acid transport), member 2 [Source:HGNC Symbol;Acc:11026] locus=11:62623518-62656352               |
| SRC           | v-src sarcoma (Schmidt-Ruppin A-2) viral oncogene homolog (avian) [Source:HGNC Symbol;Acc:11283] locus=20:35973088-36034453                                        |
| SREBF1        | sterol regulatory element binding transcription factor 1 [Source:HGNC Symbol;Acc:11289] locus=17:17714653-17740325                                                 |
| SUMO4         | SMT3 suppressor of mit two 3 homolog 4 (S. cerevisiae) [Source:HGNC Symbol;Acc:21181] locus=6:149721495-149722177                                                  |
| SYK           | spleen tyrosine kinase [Source:HGNC Symbol;Acc:11491] locus=9:93564069-93660831                                                                                    |
| TEK           | TEK tyrosine kinase, endothelial [Source:HGNC Symbol;Acc:11724] locus=9:27109139-27230173                                                                          |
| TENC1         | tensin like C1 domain containing phosphatase (tensin 2) [Source:HGNC Symbol;Acc:19737] locus=12:53440753-53458156                                                  |
| TGFBI         | transforming growth factor, beta 1 [Source:HGNC Symbol;Acc:11766] locus=19:41836813-41859831                                                                       |
| TGFBI         | transforming growth factor, beta-induced, 68kDa [Source:HGNC Symbol;Acc:11771] locus=5:135364584-135399507                                                         |
| TGFBR2        | transforming growth factor, beta receptor II (70/80kDa) [Source:HGNC Symbol;Acc:11773] locus=3:30647994-30735634                                                   |
| THBS1         | thrombospondin 1 [Source:HGNC Symbol;Acc:11785] locus=15:39873127-39891119                                                                                         |
| THBS2         | thrombospondin 2 [Source:HGNC Symbol;Acc:11786] locus=6:169615875-169654139                                                                                        |
| TIAM1         | T-cell lymphoma invasion and metastasis 1 [Source:HGNC Symbol;Acc:11805] locus=21:32361860-32932290                                                                |
| TLN1          | talin 1 [Source:HGNC Symbol;Acc:11845] locus=9:35696945-35732392                                                                                                   |
| TLR1          | toll-like receptor 1 [Source:HGNC Symbol;Acc:11847] locus=4:38792298-38858438                                                                                      |
| TLR2          | toll-like receptor 2 [Source:HGNC Symbol;Acc:11848] locus=4:154622652-154626851                                                                                    |
| TLR4          | toll-like receptor 4 [Source:HGNC Symbol;Acc:11850] locus=9:120466610-120479149                                                                                    |
| TSPAN4        | tetraspanin 4 [Source:HGNC Symbol;Acc:11859] locus=11:842808-867116                                                                                                |
| TUBB          | tubulin, beta [Source:HGNC Symbol;Acc:20778] locus=6:30687978-30693203                                                                                             |
| TUBB2C        | tubulin, beta 2C [Source:HGNC Symbol;Acc:20771] locus=9:140135665-140138159                                                                                        |
| TUBB3         | tubulin, beta 3 [Source:HGNC Symbol;Acc:20772] locus=16:88987800-90005169                                                                                          |
| TUBB4         | tubulin, beta 4 [Source:HGNC Symbol;Acc:20774] locus=19:6494331-6502330                                                                                            |
| VAV3          | vav 3 guanine nucleotide exchange factor [Source:HGNC Symbol;Acc:12659] locus=1:108113782-108507766                                                                |
| VCAM1         | vascular cell adhesion molecule 1 [Source:HGNC Symbol;Acc:12663] locus=1:101185305-101204601                                                                       |
| VCAN          | versican [Source:HGNC Symbol;Acc:2464] locus=5:82767284-82878122                                                                                                   |
| VEGFC         | vascular endothelial growth factor C [Source:HGNC Symbol;Acc:12682] locus=4:177604689-177713881                                                                    |
| VTN           | vitronectin [Source:HGNC Symbol;Acc:12724] locus=17:26691290-26697373                                                                                              |
| YWHAH         | tyrosine 3-monooxygenase/tryptophan 5-monooxygenase activation protein, beta polypeptide [Source:HGNC Symbol;Acc:12849] locus=20:43514317-43537173                 |
| YWHAZ         | tyrosine 3-monooxygenase/tryptophan 5-monooxygenase activation protein, zeta polypeptide [Source:HGNC Symbol;Acc:12855] locus=8:101930804-101965616                |

Table 8: List of KEGG [8] pathways supporting the relationships between the genes shown in Figure 8. Number of edges taken from each pathway is shown on edges column.

| name           | edges | genes                                                                                                                                                                                                                                                                                                                                                                                                                                                                                                                                                                                                                                                                                                                                                                                                                                                                                                                                                                                                                                                                                                                                                                                                                                                                                                                                                                                                                                                                                                                                                                                                                                                                                                                                                                                                                                                                                                                                                                                                                                                                                                                                                                                                                                                                                                                                                                                                                                                                                                                                                                                                                                                                                                                                                                                                                                                                                                                                                                                                                                                                                                                                                                                                                                                                                                                                                                                                                                                                                                                                                                                                                                                                                                                                                                                                                                                                                                                                                                                                                                                                                                                                                                                                                                                                                                                                                                                                                                                                                                                                                                                                                                                                                                                                                                                                                                                                                                                                                                                                                                                                                                                                                                                                                                                                                                                                                                                                                                                                                                                                                                                                                                                                                                                                                                                                                                                                                                                                                                                                                                                                                                                                                                                                                                                                                                                                                                                                                                                                                                                                                                                                                                                                                                                                                                                                                                                                                                                                                                                                                                                                                                                                                                                                                                                                                                                                                                                                                                                                                                                                                                                                                                                                                                                                                                                                                                                                                                                                                                                                                                                                                                                                                                                                                                                                                                                                                                                                                                                                                                                                                                                                                                                                                                                                                                                                                                                                                                                                                                                                                                                                                                                                                                                                                                                                                                                                                                                                                                                                                                                                                                                                                                                                                                                                                                                                                                                                                                                                                                                                                                                                                                                                                                                                                                                                                                                                                                                                                                                                                                                                                                                                                                                                                                                                                                                                                                                                                                                                                                                                                                                                                                                                                                                                                                                                                                                                                                                                                                                                                                                                                                                                                                                                                                                                                                                                                                                                                                                                                                                                                                                                                                                                                                                                                                                                                                                                                                                                                                                                                                                                                                                                                                                                                                                                                                                                                                                                                                                                                                                                                                                                                                                                                                                                                                                                                                                                                                                                                                                                                                                                                                                                                                 |
|----------------|-------|---------------------------------------------------------------------------------------------------------------------------------------------------------------------------------------------------------------------------------------------------------------------------------------------------------------------------------------------------------------------------------------------------------------------------------------------------------------------------------------------------------------------------------------------------------------------------------------------------------------------------------------------------------------------------------------------------------------------------------------------------------------------------------------------------------------------------------------------------------------------------------------------------------------------------------------------------------------------------------------------------------------------------------------------------------------------------------------------------------------------------------------------------------------------------------------------------------------------------------------------------------------------------------------------------------------------------------------------------------------------------------------------------------------------------------------------------------------------------------------------------------------------------------------------------------------------------------------------------------------------------------------------------------------------------------------------------------------------------------------------------------------------------------------------------------------------------------------------------------------------------------------------------------------------------------------------------------------------------------------------------------------------------------------------------------------------------------------------------------------------------------------------------------------------------------------------------------------------------------------------------------------------------------------------------------------------------------------------------------------------------------------------------------------------------------------------------------------------------------------------------------------------------------------------------------------------------------------------------------------------------------------------------------------------------------------------------------------------------------------------------------------------------------------------------------------------------------------------------------------------------------------------------------------------------------------------------------------------------------------------------------------------------------------------------------------------------------------------------------------------------------------------------------------------------------------------------------------------------------------------------------------------------------------------------------------------------------------------------------------------------------------------------------------------------------------------------------------------------------------------------------------------------------------------------------------------------------------------------------------------------------------------------------------------------------------------------------------------------------------------------------------------------------------------------------------------------------------------------------------------------------------------------------------------------------------------------------------------------------------------------------------------------------------------------------------------------------------------------------------------------------------------------------------------------------------------------------------------------------------------------------------------------------------------------------------------------------------------------------------------------------------------------------------------------------------------------------------------------------------------------------------------------------------------------------------------------------------------------------------------------------------------------------------------------------------------------------------------------------------------------------------------------------------------------------------------------------------------------------------------------------------------------------------------------------------------------------------------------------------------------------------------------------------------------------------------------------------------------------------------------------------------------------------------------------------------------------------------------------------------------------------------------------------------------------------------------------------------------------------------------------------------------------------------------------------------------------------------------------------------------------------------------------------------------------------------------------------------------------------------------------------------------------------------------------------------------------------------------------------------------------------------------------------------------------------------------------------------------------------------------------------------------------------------------------------------------------------------------------------------------------------------------------------------------------------------------------------------------------------------------------------------------------------------------------------------------------------------------------------------------------------------------------------------------------------------------------------------------------------------------------------------------------------------------------------------------------------------------------------------------------------------------------------------------------------------------------------------------------------------------------------------------------------------------------------------------------------------------------------------------------------------------------------------------------------------------------------------------------------------------------------------------------------------------------------------------------------------------------------------------------------------------------------------------------------------------------------------------------------------------------------------------------------------------------------------------------------------------------------------------------------------------------------------------------------------------------------------------------------------------------------------------------------------------------------------------------------------------------------------------------------------------------------------------------------------------------------------------------------------------------------------------------------------------------------------------------------------------------------------------------------------------------------------------------------------------------------------------------------------------------------------------------------------------------------------------------------------------------------------------------------------------------------------------------------------------------------------------------------------------------------------------------------------------------------------------------------------------------------------------------------------------------------------------------------------------------------------------------------------------------------------------------------------------------------------------------------------------------------------------------------------------------------------------------------------------------------------------------------------------------------------------------------------------------------------------------------------------------------------------------------------------------------------------------------------------------------------------------------------------------------------------------------------------------------------------------------------------------------------------------------------------------------------------------------------------------------------------------------------------------------------------------------------------------------------------------------------------------------------------------------------------------------------------------------------------------------------------------------------------------------------------------------------------------------------------------------------------------------------------------------------------------------------------------------------------------------------------------------------------------------------------------------------------------------------------------------------------------------------------------------------------------------------------------------------------------------------------------------------------------------------------------------------------------------------------------------------------------------------------------------------------------------------------------------------------------------------------------------------------------------------------------------------------------------------------------------------------------------------------------------------------------------------------------------------------------------------------------------------------------------------------------------------------------------------------------------------------------------------------------------------------------------------------------------------------------------------------------------------------------------------------------------------------------------------------------------------------------------------------------------------------------------------------------------------------------------------------------------------------------------------------------------------------------------------------------------------------------------------------------------------------------------------------------------------------------------------------------------------------------------------------------------------------------------------------------------------------------------------------------------------------------------------------------------------------------------------------------------------------------------------------------------------------------------------------------------------------------------------------------------------------------------------------------------------------------------------------------------------------------------------------------------------------------------------------------------------------------------------------------------------------------------------------------------------------------------------------------------------------------------------------------------------------------------------------------------------------------------------------------------------------------------------------------------------------------------------------------------------------------------------------------------------------------------------------------------------------------------------------------------------------------------------------------------------------------------------------------------------------------------------------------------------------------------------------------------------------------------------------------------------------------------------------------------------------------------------------------------------------------------------------------------------------------------------------------------------------------------------------------------------------------------------------------------------------------------------------------------------------------------------------------------------------------------------------------------------------------------------------------------------------------------------------------------------------------------------------------------------------------------------------------------------------------------------------------------------------------------------------------------------------------------------------------------------------------------------------------------------------------------------------------------------------------------------------------------------------------------------------------------------------------------------------------------------------------------------------------------------------------------|
| Focal adhesion | 93    | AC002094.1, ACTB, ACTG1, ACTN1, ACTN3, AKT1, ARHGAP5, C17orf57, CAV1, CAV2, CAV3, COL11A1, COL11A2, COL1A1, COL1A2, COL3A1, COL5A1, COL5A2, COL6A1, COL6A2, CRK, CTNNA1, EGFR, FIGF, FLNA, FN1, FYN, GRB2, IGF1, IGF1R, ILK, ITGA1, ITGA10, ITGA11, ITGA4, ITGA5, ITGA6, ITGA7, ITGA8, ITGA9, ITGB1, ITGB2, ITGB3, ITGB4, ITGB5, ITGB6, ITGB7, ITGB8, ITGB9, ITGC1, ITGC2, ITGC3, ITGC4, ITGC5, ITGC6, ITGC7, ITGC8, ITGC9, ITGD1, ITGD2, ITGD3, ITGD4, ITGD5, ITGD6, ITGD7, ITGD8, ITGD9, ITGE1, ITGE2, ITGE3, ITGE4, ITGE5, ITGE6, ITGE7, ITGE8, ITGE9, ITGF1, ITGF2, ITGF3, ITGF4, ITGF5, ITGF6, ITGF7, ITGF8, ITGF9, ITGHA1, ITGHA2, ITGHB1, ITGHB2, ITGHB3, ITGHB4, ITGHB5, ITGHB6, ITGHB7, ITGHB8, ITGHB9, ITGHD1, ITGHD2, ITGHD3, ITGHD4, ITGHD5, ITGHD6, ITGHD7, ITGHD8, ITGHD9, ITGHE1, ITGHE2, ITGHE3, ITGHE4, ITGHE5, ITGHE6, ITGHE7, ITGHE8, ITGHE9, ITGHA10, ITGHA11, ITGHA12, ITGHB10, ITGHB11, ITGHB12, ITGHB13, ITGHB14, ITGHB15, ITGHB16, ITGHB17, ITGHB18, ITGHB19, ITGHB20, ITGHB21, ITGHB22, ITGHB23, ITGHB24, ITGHB25, ITGHB26, ITGHB27, ITGHB28, ITGHB29, ITGHB30, ITGHB31, ITGHB32, ITGHB33, ITGHB34, ITGHB35, ITGHB36, ITGHB37, ITGHB38, ITGHB39, ITGHB40, ITGHB41, ITGHB42, ITGHB43, ITGHB44, ITGHB45, ITGHB46, ITGHB47, ITGHB48, ITGHB49, ITGHB50, ITGHB51, ITGHB52, ITGHB53, ITGHB54, ITGHB55, ITGHB56, ITGHB57, ITGHB58, ITGHB59, ITGHB60, ITGHB61, ITGHB62, ITGHB63, ITGHB64, ITGHB65, ITGHB66, ITGHB67, ITGHB68, ITGHB69, ITGHB70, ITGHB71, ITGHB72, ITGHB73, ITGHB74, ITGHB75, ITGHB76, ITGHB77, ITGHB78, ITGHB79, ITGHB80, ITGHB81, ITGHB82, ITGHB83, ITGHB84, ITGHB85, ITGHB86, ITGHB87, ITGHB88, ITGHB89, ITGHB90, ITGHB91, ITGHB92, ITGHB93, ITGHB94, ITGHB95, ITGHB96, ITGHB97, ITGHB98, ITGHB99, ITGHB100, ITGHA11, ITGHA12, ITGHA13, ITGHA14, ITGHA15, ITGHA16, ITGHA17, ITGHA18, ITGHA19, ITGHA20, ITGHA21, ITGHA22, ITGHA23, ITGHA24, ITGHA25, ITGHA26, ITGHA27, ITGHA28, ITGHA29, ITGHA30, ITGHA31, ITGHA32, ITGHA33, ITGHA34, ITGHA35, ITGHA36, ITGHA37, ITGHA38, ITGHA39, ITGHA40, ITGHA41, ITGHA42, ITGHA43, ITGHA44, ITGHA45, ITGHA46, ITGHA47, ITGHA48, ITGHA49, ITGHA50, ITGHA51, ITGHA52, ITGHA53, ITGHA54, ITGHA55, ITGHA56, ITGHA57, ITGHA58, ITGHA59, ITGHA60, ITGHA61, ITGHA62, ITGHA63, ITGHA64, ITGHA65, ITGHA66, ITGHA67, ITGHA68, ITGHA69, ITGHA70, ITGHA71, ITGHA72, ITGHA73, ITGHA74, ITGHA75, ITGHA76, ITGHA77, ITGHA78, ITGHA79, ITGHA80, ITGHA81, ITGHA82, ITGHA83, ITGHA84, ITGHA85, ITGHA86, ITGHA87, ITGHA88, ITGHA89, ITGHA90, ITGHA91, ITGHA92, ITGHA93, ITGHA94, ITGHA95, ITGHA96, ITGHA97, ITGHA98, ITGHA99, ITGHA100, ITGHA101, ITGHA102, ITGHA103, ITGHA104, ITGHA105, ITGHA106, ITGHA107, ITGHA108, ITGHA109, ITGHA110, ITGHA111, ITGHA112, ITGHA113, ITGHA114, ITGHA115, ITGHA116, ITGHA117, ITGHA118, ITGHA119, ITGHA120, ITGHA121, ITGHA122, ITGHA123, ITGHA124, ITGHA125, ITGHA126, ITGHA127, ITGHA128, ITGHA129, ITGHA130, ITGHA131, ITGHA132, ITGHA133, ITGHA134, ITGHA135, ITGHA136, ITGHA137, ITGHA138, ITGHA139, ITGHA140, ITGHA141, ITGHA142, ITGHA143, ITGHA144, ITGHA145, ITGHA146, ITGHA147, ITGHA148, ITGHA149, ITGHA150, ITGHA151, ITGHA152, ITGHA153, ITGHA154, ITGHA155, ITGHA156, ITGHA157, ITGHA158, ITGHA159, ITGHA160, ITGHA161, ITGHA162, ITGHA163, ITGHA164, ITGHA165, ITGHA166, ITGHA167, ITGHA168, ITGHA169, ITGHA170, ITGHA171, ITGHA172, ITGHA173, ITGHA174, ITGHA175, ITGHA176, ITGHA177, ITGHA178, ITGHA179, ITGHA180, ITGHA181, ITGHA182, ITGHA183, ITGHA184, ITGHA185, ITGHA186, ITGHA187, ITGHA188, ITGHA189, ITGHA190, ITGHA191, ITGHA192, ITGHA193, ITGHA194, ITGHA195, ITGHA196, ITGHA197, ITGHA198, ITGHA199, ITGHA200, ITGHA201, ITGHA202, ITGHA203, ITGHA204, ITGHA205, ITGHA206, ITGHA207, ITGHA208, ITGHA209, ITGHA210, ITGHA211, ITGHA212, ITGHA213, ITGHA214, ITGHA215, ITGHA216, ITGHA217, ITGHA218, ITGHA219, ITGHA220, ITGHA221, ITGHA222, ITGHA223, ITGHA224, ITGHA225, ITGHA226, ITGHA227, ITGHA228, ITGHA229, ITGHA230, ITGHA231, ITGHA232, ITGHA233, ITGHA234, ITGHA235, ITGHA236, ITGHA237, ITGHA238, ITGHA239, ITGHA240, ITGHA241, ITGHA242, ITGHA243, ITGHA244, ITGHA245, ITGHA246, ITGHA247, ITGHA248, ITGHA249, ITGHA250, ITGHA251, ITGHA252, ITGHA253, ITGHA254, ITGHA255, ITGHA256, ITGHA257, ITGHA258, ITGHA259, ITGHA260, ITGHA261, ITGHA262, ITGHA263, ITGHA264, ITGHA265, ITGHA266, ITGHA267, ITGHA268, ITGHA269, ITGHA270, ITGHA271, ITGHA272, ITGHA273, ITGHA274, ITGHA275, ITGHA276, ITGHA277, ITGHA278, ITGHA279, ITGHA280, ITGHA281, ITGHA282, ITGHA283, ITGHA284, ITGHA285, ITGHA286, ITGHA287, ITGHA288, ITGHA289, ITGHA290, ITGHA291, ITGHA292, ITGHA293, ITGHA294, ITGHA295, ITGHA296, ITGHA297, ITGHA298, ITGHA299, ITGHA300, ITGHA301, ITGHA302, ITGHA303, ITGHA304, ITGHA305, ITGHA306, ITGHA307, ITGHA308, ITGHA309, ITGHA310, ITGHA311, ITGHA312, ITGHA313, ITGHA314, ITGHA315, ITGHA316, ITGHA317, ITGHA318, ITGHA319, ITGHA320, ITGHA321, ITGHA322, ITGHA323, ITGHA324, ITGHA325, ITGHA326, ITGHA327, ITGHA328, ITGHA329, ITGHA330, ITGHA331, ITGHA332, ITGHA333, ITGHA334, ITGHA335, ITGHA336, ITGHA337, ITGHA338, ITGHA339, ITGHA340, ITGHA341, ITGHA342, ITGHA343, ITGHA344, ITGHA345, ITGHA346, ITGHA347, ITGHA348, ITGHA349, ITGHA350, ITGHA351, ITGHA352, ITGHA353, ITGHA354, ITGHA355, ITGHA356, ITGHA357, ITGHA358, ITGHA359, ITGHA360, ITGHA361, ITGHA362, ITGHA363, ITGHA364, ITGHA365, ITGHA366, ITGHA367, ITGHA368, ITGHA369, ITGHA370, ITGHA371, ITGHA372, ITGHA373, ITGHA374, ITGHA375, ITGHA376, ITGHA377, ITGHA378, ITGHA379, ITGHA380, ITGHA381, ITGHA382, ITGHA383, ITGHA384, ITGHA385, ITGHA386, ITGHA387, ITGHA388, ITGHA389, ITGHA390, ITGHA391, ITGHA392, ITGHA393, ITGHA394, ITGHA395, ITGHA396, ITGHA397, ITGHA398, ITGHA399, ITGHA400, ITGHA401, ITGHA402, ITGHA403, ITGHA404, ITGHA405, ITGHA406, ITGHA407, ITGHA408, ITGHA409, ITGHA410, ITGHA411, ITGHA412, ITGHA413, ITGHA414, ITGHA415, ITGHA416, ITGHA417, ITGHA418, ITGHA419, ITGHA420, ITGHA421, ITGHA422, ITGHA423, ITGHA424, ITGHA425, ITGHA426, ITGHA427, ITGHA428, ITGHA429, ITGHA430, ITGHA431, ITGHA432, ITGHA433, ITGHA434, ITGHA435, ITGHA436, ITGHA437, ITGHA438, ITGHA439, ITGHA440, ITGHA441, ITGHA442, ITGHA443, ITGHA444, ITGHA445, ITGHA446, ITGHA447, ITGHA448, ITGHA449, ITGHA450, ITGHA451, ITGHA452, ITGHA453, ITGHA454, ITGHA455, ITGHA456, ITGHA457, ITGHA458, ITGHA459, ITGHA460, ITGHA461, ITGHA462, ITGHA463, ITGHA464, ITGHA465, ITGHA466, ITGHA467, ITGHA468, ITGHA469, ITGHA470, ITGHA471, ITGHA472, ITGHA473, ITGHA474, ITGHA475, ITGHA476, ITGHA477, ITGHA478, ITGHA479, ITGHA480, ITGHA481, ITGHA482, ITGHA483, ITGHA484, ITGHA485, ITGHA486, ITGHA487, ITGHA488, ITGHA489, ITGHA490, ITGHA491, ITGHA492, ITGHA493, ITGHA494, ITGHA495, ITGHA496, ITGHA497, ITGHA498, ITGHA499, ITGHA500, ITGHA501, ITGHA502, ITGHA503, ITGHA504, ITGHA505, ITGHA506, ITGHA507, ITGHA508, ITGHA509, ITGHA510, ITGHA511, ITGHA512, ITGHA513, ITGHA514, ITGHA515, ITGHA516, ITGHA517, ITGHA518, ITGHA519, ITGHA520, ITGHA521, ITGHA522, ITGHA523, ITGHA524, ITGHA525, ITGHA526, ITGHA527, ITGHA528, ITGHA529, ITGHA530, ITGHA531, ITGHA532, ITGHA533, ITGHA534, ITGHA535, ITGHA536, ITGHA537, ITGHA538, ITGHA539, ITGHA540, ITGHA541, ITGHA542, ITGHA543, ITGHA544, ITGHA545, ITGHA546, ITGHA547, ITGHA548, ITGHA549, ITGHA550, ITGHA551, ITGHA552, ITGHA553, ITGHA554, ITGHA555, ITGHA556, ITGHA557, ITGHA558, ITGHA559, ITGHA560, ITGHA561, ITGHA562, ITGHA563, ITGHA564, ITGHA565, ITGHA566, ITGHA567, ITGHA568, ITGHA569, ITGHA570, ITGHA571, ITGHA572, ITGHA573, ITGHA574, ITGHA575, ITGHA576, ITGHA577, ITGHA578, ITGHA579, ITGHA580, ITGHA581, ITGHA582, ITGHA583, ITGHA584, ITGHA585, ITGHA586, ITGHA587, ITGHA588, ITGHA589, ITGHA590, ITGHA591, ITGHA592, ITGHA593, ITGHA594, ITGHA595, ITGHA596, ITGHA597, ITGHA598, ITGHA599, ITGHA600, ITGHA601, ITGHA602, ITGHA603, ITGHA604, ITGHA605, ITGHA606, ITGHA607, ITGHA608, ITGHA609, ITGHA610, ITGHA611, ITGHA612, ITGHA613, ITGHA614, ITGHA615, ITGHA616, ITGHA617, ITGHA618, ITGHA619, ITGHA620, ITGHA621, ITGHA622, ITGHA623, ITGHA624, ITGHA625, ITGHA626, ITGHA627, ITGHA628, ITGHA629, ITGHA630, ITGHA631, ITGHA632, ITGHA633, ITGHA634, ITGHA635, ITGHA636, ITGHA637, ITGHA638, ITGHA639, ITGHA640, ITGHA641, ITGHA642, ITGHA643, ITGHA644, ITGHA645, ITGHA646, ITGHA647, ITGHA648, ITGHA649, ITGHA650, ITGHA651, ITGHA652, ITGHA653, ITGHA654, ITGHA655, ITGHA656, ITGHA657, ITGHA658, ITGHA659, ITGHA660, ITGHA661, ITGHA662, ITGHA663, ITGHA664, ITGHA665, ITGHA666, ITGHA667, ITGHA668, ITGHA669, ITGHA670, ITGHA671, ITGHA672, ITGHA673, ITGHA674, ITGHA675, ITGHA676, ITGHA677, ITGHA678, ITGHA679, ITGHA680, ITGHA681, ITGHA682, ITGHA683, ITGHA684, ITGHA685, ITGHA686, ITGHA687, ITGHA688, ITGHA689, ITGHA690, ITGHA691, ITGHA692, ITGHA693, ITGHA694, ITGHA695, ITGHA696, ITGHA697, ITGHA698, ITGHA699, ITGHA700, ITGHA701, ITGHA702, ITGHA703, ITGHA704, ITGHA705, ITGHA706, ITGHA707, ITGHA708, ITGHA709, ITGHA710, ITGHA711, ITGHA712, ITGHA713, ITGHA714, ITGHA715, ITGHA716, ITGHA717, ITGHA718, ITGHA719, ITGHA720, ITGHA721, ITGHA722, ITGHA723, ITGHA724, ITGHA725, ITGHA726, ITGHA727, ITGHA728, ITGHA729, ITGHA730, ITGHA731, ITGHA732, ITGHA733, ITGHA734, ITGHA735, ITGHA736, ITGHA737, ITGHA738, ITGHA739, ITGHA740, ITGHA741, ITGHA742, ITGHA743, ITGHA744, ITGHA745, ITGHA746, ITGHA747, ITGHA748, ITGHA749, ITGHA750, ITGHA751, ITGHA752, ITGHA753, ITGHA754, ITGHA755, ITGHA756, ITGHA757, ITGHA758, ITGHA759, ITGHA760, ITGHA761, ITGHA762, ITGHA763, ITGHA764, ITGHA765, ITGHA766, ITGHA767, ITGHA768, ITGHA769, ITGHA770, ITGHA771, ITGHA772, ITGHA773, ITGHA774, ITGHA775, ITGHA776, ITGHA777, ITGHA778, ITGHA779, ITGHA780, ITGHA781, ITGHA782, ITGHA783, ITGHA784, ITGHA785, ITGHA786, ITGHA787, ITGHA788, ITGHA789, ITGHA790, ITGHA791, ITGHA792, ITGHA793, ITGHA794, ITGHA795, ITGHA796, ITGHA797, ITGHA798, ITGHA799, ITGHA800, ITGHA801, ITGHA802, ITGHA803, ITGHA804, ITGHA805, ITGHA806, ITGHA807, ITGHA808, ITGHA809, ITGHA810, ITGHA811, ITGHA812, ITGHA813, ITGHA814, ITGHA815, ITGHA816, ITGHA817, ITGHA818, ITGHA819, ITGHA820, ITGHA821, ITGHA822, ITGHA823, ITGHA824, ITGHA825, ITGHA826, ITGHA827, ITGHA828, ITGHA829, ITGHA830, ITGHA831, ITGHA832, ITGHA833, ITGHA834, ITGHA835, ITGHA836, ITGHA837, ITGHA838, ITGHA839, ITGHA840, ITGHA841, ITGHA842, ITGHA843, ITGHA844, ITGHA845, ITGHA846, ITGHA847, ITGHA848, ITGHA849, ITGHA850, ITGHA851, ITGHA852, ITGHA853, ITGHA854, ITGHA855, ITGHA856, ITGHA857, ITGHA858, ITGHA859, ITGHA860, ITGHA861, ITGHA862, ITGHA863, ITGHA864, ITGHA865, ITGHA866, ITGHA867, ITGHA868, ITGHA869, ITGHA870, ITGHA871, ITGHA872, ITGHA873, ITGHA874, ITGHA875, ITGHA876, ITGHA877, ITGHA878, ITGHA879, ITGHA880, ITGHA881, ITGHA882, ITGHA883, ITGHA884, ITGHA885, ITGHA886, ITGHA887, ITGHA888, ITGHA889, ITGHA890, ITGHA891, ITGHA892, ITGHA893, ITGHA894, ITGHA895, ITGHA896, ITGHA897, ITGHA898, ITGHA899, ITGHA900, ITGHA901, ITGHA902, ITGHA903, ITGHA904, ITGHA905, ITGHA906, ITGHA907, ITGHA908, ITGHA909, ITGHA910, ITGHA911, ITGHA912, ITGHA913, ITGHA914, ITGHA915, ITGHA916, ITGHA917, ITGHA918, ITGHA919, ITGHA920, ITGHA921, ITGHA922, ITGHA923, ITGHA924, ITGHA925, ITGHA926, ITGHA927, ITGHA928, ITGHA929, ITGHA930, ITGHA931, ITGHA932, ITGHA933, ITGHA934, ITGHA935, ITGHA936, ITGHA937, ITGHA938, ITGHA939, ITGHA940, ITGHA941, ITGHA942, ITGHA943, ITGHA944, ITGHA945, ITGHA946, ITGHA947, ITGHA948, ITGHA949, ITGHA950, ITGHA951, ITGHA952, ITGHA953, ITGHA954, ITGHA955, ITGHA956, ITGHA957, ITGHA958, ITGHA959, ITGHA960, ITGHA961, ITGHA962, ITGHA963, ITGHA964, ITGHA965, ITGHA966, ITGHA967, ITGHA968, ITGHA969, ITGHA970, ITGHA971, ITGHA972, ITGHA973, ITGHA974, ITGHA975, ITGHA976, ITGHA977, ITGHA978, ITGHA979, ITGHA980, ITGHA981, ITGHA982, ITGHA983, ITGHA984, ITGHA985, ITGHA986, ITGHA987, ITGHA988, ITGHA989, ITGHA990, ITGHA991, ITGHA992, ITGHA993, ITGHA994, ITGHA995, ITGHA996, ITGHA997, ITGHA998, ITGHA999, ITGHA1000, ITGHA1001, ITGHA1002, ITGHA1003, ITGHA1004, ITGHA1005, ITGHA1006, ITGHA1007, ITGHA1008, ITGHA1009, ITGHA1010, ITGHA1011, ITGHA1012, ITGHA1013, ITGHA1014, ITGHA1015, ITGHA1016, ITGHA1017, ITGHA1018, ITGHA1019, ITGHA1020, ITGHA1021, ITGHA1022, ITGHA1023, ITGHA1024, ITGHA1025, ITGHA1026, ITGHA1027, ITGHA1028, ITGHA1029, ITGHA1030, ITGHA1031, ITGHA1032, ITGHA1033, ITGHA1034, ITGHA1035, ITGHA1036, ITGHA1037, ITGHA1038, ITGHA1039, ITGHA1040, ITGHA1041, ITGHA1042, ITGHA1043, ITGHA1044, ITGHA1045, ITGHA1046, ITGHA1047, ITGHA1048, ITGHA1049, ITGHA1050, ITGHA1051, ITGHA1052, ITGHA1053, ITGHA1054, ITGHA1055, ITGHA1056, ITGHA1057, ITGHA1058, ITGHA1059, ITGHA1060, ITGHA1061, ITGHA1062, ITGHA1063, ITGHA1064, ITGHA1065, ITGHA1066, ITGHA1067, ITGHA1068, ITGHA1069, ITGHA1070, ITGHA1071, ITGHA1072, ITGHA1073, ITGHA1074, ITGHA1075, ITGHA1076, ITGHA1077, ITGHA1078, ITGHA1079, ITGHA1080, ITGHA1081, ITGHA1082, ITGHA1083, ITGHA1084, ITGHA1085, ITGHA1086, ITGHA1087, ITGHA1088, ITGHA1089, ITGHA1090, ITGHA1091, ITGHA1092, ITGHA1093, ITGHA1094, ITGHA1095, ITGHA1096, ITGHA1097, ITGHA1098, ITGHA1099, ITGHA1100, ITGHA1101, ITGHA1102, ITGHA1103, ITGHA1104, ITGHA1105, ITGHA1106, ITGHA1107, ITGHA1108, ITGHA1109, ITGHA1110, ITGHA1111, ITGHA1112, ITGHA1113, ITGHA1114, ITGHA1115, ITGHA1116, ITGHA1117, ITGHA1118, ITGHA1119, ITGHA1120, ITGHA1121, ITGHA1122, ITGHA1123, ITGHA1124, ITGHA1125, ITGHA1126, ITGHA1127, ITGHA1128, ITGHA1129, ITGHA1130, ITGHA1131, ITGHA1132, ITGHA1133, ITGHA1134, ITGHA1135, ITGHA1136, ITGHA1137, ITGHA1138, ITGHA1139, ITGHA1140, ITGHA1141, ITGHA1142, ITGHA1143, ITGHA1144, ITGHA1145, ITGHA1 |

| name                                      | edges | genes                                                                                                              |
|-------------------------------------------|-------|--------------------------------------------------------------------------------------------------------------------|
| Cytokine-cytokine receptor interaction    | 5     | CSF1, CSF1R, CSF2RA, CSF2RB, EGFR, FIGF, KDR, PDGFB, PDGFRA, PDGFRB, TGFB1, TGFB2, VEGFC                           |
| T cell receptor signaling pathway         | 5     | AKT1, FYN, GRB2, LCK, PIK3CA, PIK3R1, RHOA, VAV3                                                                   |
| Salmonella infection                      | 4     | ACTB, ACTG1, CD14, DYNC1H1, DYNC1H2, DYNC2H1, FLNA, MYD88, RAC1, TLR4                                              |
| Chronic myeloid leukemia                  | 4     | AKT1, CRK, E2F1, GRB2, PIK3CA, PIK3R1, SHC1, TGFB1, TGFB2                                                          |
| Type II diabetes mellitus                 | 4     | IRS1, PIK3CA, PIK3R1, PRKCD                                                                                        |
| Tuberculosis                              | 4     | AKT1, CD14, HSPD1, MYD88, RHOA, SRC, SYK, TGFB1, TLR1, TLR2, TLR4                                                  |
| Vibrio cholerae infection                 | 4     | ACTB, ACTG1, PRKACA, PRKCB                                                                                         |
| Legionellosis                             | 4     | CD14, HSPA1A, HSPA1B, HSPD1, MYD88, NFKB2, TLR2, TLR4                                                              |
| Small cell lung cancer                    | 4     | AKT1, CDK2, E2F1, FN1, ITGA6, ITGAV, ITGB1, LAMA2, LAMA4, LAMB1, LAMB2, LAMB3, LAMC1, LAMC2, LAMC3, PIK3CA, PIK3R1 |
| Acute myeloid leukemia                    | 4     | AKT1, CCNA1, GRB2, JUP, PIK3CA, PIK3R1                                                                             |
| Long-term depression                      | 3     | IGF1, IGF1R, LYN, PPP2R1A, PRKCB                                                                                   |
| Aldosterone-regulated sodium reabsorption | 3     | ATP1B3, IGF1, IRS1, NR3C2, PIK3CA, PIK3R1, PRKCB                                                                   |
| TGF-beta signaling pathway                | 3     | PPP2R1A, RHOA, TGFB1, TGFB2, THBS1, THBS2                                                                          |
| Rheumatoid arthritis                      | 2     | ANGPT1, CSF1, TEK, TGFB1, TLR2, TLR4                                                                               |
| Colorectal cancer                         | 2     | AKT1, CTNNB1, PIK3CA, PIK3R1, RAC1, RHOA, TGFB1, TGFB2                                                             |
| Hepatitis C                               | 2     | AKT1, CD81, EGFR, GRB2, PIK3CA, PIK3R1, PPP2R1A                                                                    |
| Complement and coagulation cascades       | 2     | F2R, FGA, FGB, PLAU, PLAU, SERPINE1                                                                                |
| Jak-STAT signaling pathway                | 2     | AKT1, CSF2RA, CSF2RB, GRB2, PIK3CA, PIK3R1                                                                         |
| Dopaminergic synapse                      | 2     | AKT1, PPP2R1A, PRKACA, PRKCB                                                                                       |
| Malaria                                   | 2     | CD81, LRP1, MYD88, SDC1, SDC2, TGFB1, THBS1, THBS2, TLR2, TLR4, VCAM1                                              |
| Leishmaniasis                             | 2     | ITGA4, ITGB1, MYD88, PRKCB, TGFB1, TLR2, TLR4                                                                      |
| B cell receptor signaling pathway         | 2     | AKT1, CD81, GRB2, LYN, PIK3CA, PIK3R1, PRKCB, RAC1, SYK, VAV3                                                      |
| Viral myocarditis                         | 2     | ACTB, ACTG1, CAV1, FYN, LAMA2, RAC1                                                                                |
| Notch signaling pathway                   | 1     | DLL1, NOTCH1                                                                                                       |
| Dorso-ventral axis formation              | 1     | EGFR, GRB2, NOTCH1                                                                                                 |
| Wnt signaling pathway                     | 1     | CTNNB1, PPP2R1A, PRKACA, PRKCB, RAC1, RHOA                                                                         |
| Oocyte meiosis                            | 1     | AR, AURKA, CDK2, IGF1, IGF1R, MAD2L1, PPP2R1A, PRKACA, YWHAB, YWHAZ                                                |
| Progesterone-mediated oocyte maturation   | 1     | AKT1, CCNA1, CDK2, IGF1, IGF1R, MAD2L1, PIK3CA, PIK3R1, PRKACA                                                     |
| Herpes simplex infection                  | 1     | CDK2, MYD88, TLR2                                                                                                  |

## 2.2 Candidate genes

Table 9: Descriptions of the candidate genes. S column contains an at sign if the gene is part of the candidate pathway. The statuses of the genes are shown as: *a*=absent, *d*=down regulated, *u*=up regulated, *s*=stable. This table has 23 rows.

| S  | name           | locus                            | description                                                                                                                                                                                                                                                                                                                                                                                                                                                                                                                                                                                                                                                                                                                                                                                                                                                                                                                                                                                                                                                                                                                                                                                                                                                                                                                                                                                                                                                                                                                                                                                                                                                                                                                                                                                                                                                                                                                                                                                                                                                                                                                                                                                                                                                                                                                                                                                                                                                                                                                                                                                                                                                                                                                                                                                                                                                                                                                                                                               |
|----|----------------|----------------------------------|-------------------------------------------------------------------------------------------------------------------------------------------------------------------------------------------------------------------------------------------------------------------------------------------------------------------------------------------------------------------------------------------------------------------------------------------------------------------------------------------------------------------------------------------------------------------------------------------------------------------------------------------------------------------------------------------------------------------------------------------------------------------------------------------------------------------------------------------------------------------------------------------------------------------------------------------------------------------------------------------------------------------------------------------------------------------------------------------------------------------------------------------------------------------------------------------------------------------------------------------------------------------------------------------------------------------------------------------------------------------------------------------------------------------------------------------------------------------------------------------------------------------------------------------------------------------------------------------------------------------------------------------------------------------------------------------------------------------------------------------------------------------------------------------------------------------------------------------------------------------------------------------------------------------------------------------------------------------------------------------------------------------------------------------------------------------------------------------------------------------------------------------------------------------------------------------------------------------------------------------------------------------------------------------------------------------------------------------------------------------------------------------------------------------------------------------------------------------------------------------------------------------------------------------------------------------------------------------------------------------------------------------------------------------------------------------------------------------------------------------------------------------------------------------------------------------------------------------------------------------------------------------------------------------------------------------------------------------------------------------|
| u* | <b>ADAM10</b>  | 15:58887403-59042177<br>15q21.3  | ADAM metallopeptidase domain 10 [Source:HGNC Symbol;Acc:188], type=processed_transcript,protein_coding,retained_intron, GO=[constitutive protein ectodomain proteolysis; PMA-inducible membrane protein ectodomain proteolysis; monocyte activation; T cell chemotaxis; regulation of T cell chemotaxis; positive regulation of T cell chemotaxis; Notch receptor processing; Golgi-associated vesicle; negative regulation of cell adhesion; integrin-mediated signaling pathway; response to tumor necrosis factor; integrin binding; Notch signaling pathway; positive regulation of cell growth; myeloid leukocyte activation; metalloendopeptidase activity; postsynaptic density; epidermal growth factor receptor signaling pathway; SH3 domain binding; positive regulation of cell migration; regulation of cell adhesion; leukocyte migration; protein kinase binding; in utero embryonic development; cell surface; protein homodimerization activity; chemotaxis; protein dimerization activity; identical protein binding]                                                                                                                                                                                                                                                                                                                                                                                                                                                                                                                                                                                                                                                                                                                                                                                                                                                                                                                                                                                                                                                                                                                                                                                                                                                                                                                                                                                                                                                                                                                                                                                                                                                                                                                                                                                                                                                                                                                                                   |
|    | <b>ALDH7A1</b> | 5:125877533-125931110<br>5q23.2  | aldehyde dehydrogenase 7 family, member A1 [Source:HGNC Symbol;Acc:877], type=nonsense_mediated_decay,processed_transcript,protein_coding,retained_intron, GO=[betaine-aldehyde dehydrogenase activity; L-aminoadipate-semialdehyde dehydrogenase activity; lysine catabolic process; lysine metabolic process; aldehyde dehydrogenase (NAD) activity; aspartate family amino acid catabolic process; cellular aldehyde metabolic process; aspartate family amino acid metabolic process; sensory perception of sound; mitochondrial matrix]                                                                                                                                                                                                                                                                                                                                                                                                                                                                                                                                                                                                                                                                                                                                                                                                                                                                                                                                                                                                                                                                                                                                                                                                                                                                                                                                                                                                                                                                                                                                                                                                                                                                                                                                                                                                                                                                                                                                                                                                                                                                                                                                                                                                                                                                                                                                                                                                                                              |
| u  | <b>ART3</b>    | 4:76932337-77033955<br>4q21.1    | ADP-ribosyltransferase 3 [Source:HGNC Symbol;Acc:725], type=processed_transcript,protein_coding,retained_intron, GO=[NAD(P)+-protein-arginine ADP-ribosyltransferase activity; NAD+ ADP-ribosyltransferase activity; protein ADP-ribosylation; anchored to membrane]                                                                                                                                                                                                                                                                                                                                                                                                                                                                                                                                                                                                                                                                                                                                                                                                                                                                                                                                                                                                                                                                                                                                                                                                                                                                                                                                                                                                                                                                                                                                                                                                                                                                                                                                                                                                                                                                                                                                                                                                                                                                                                                                                                                                                                                                                                                                                                                                                                                                                                                                                                                                                                                                                                                      |
|    | <b>ATP10A</b>  | 15:25922420-26110317<br>15q12    | ATPase, class V, type 10A [Source:HGNC Symbol;Acc:13542], type=nonsense_mediated_decay,processed_transcript,protein_coding,retained_intron, GO=[phospholipid-translocating ATPase activity; phospholipid transport; ATPase activity, coupled to transmembrane movement of ions, phosphorylative mechanism; regulation of cell shape; ATP biosynthetic process; purine ribonucleoside triphosphate biosynthetic process; ATP metabolic process; magnesium ion binding; lipid transport; ion transmembrane transport]                                                                                                                                                                                                                                                                                                                                                                                                                                                                                                                                                                                                                                                                                                                                                                                                                                                                                                                                                                                                                                                                                                                                                                                                                                                                                                                                                                                                                                                                                                                                                                                                                                                                                                                                                                                                                                                                                                                                                                                                                                                                                                                                                                                                                                                                                                                                                                                                                                                                       |
| u* | <b>ATP1B3</b>  | 3:141594966-141645356<br>3q23    | ATPase, Na <sup>+</sup> /K <sup>+</sup> transporting, beta 3 polypeptide [Source:HGNC Symbol;Acc:806], type=nonsense_mediated_decay,processed_transcript,protein_coding,retained_intron, GO=[sodium:potassium-exchanging ATPase complex; sodium:potassium-exchanging ATPase activity; ATPase activity, coupled to transmembrane movement of ions, phosphorylative mechanism; caveola; ATP biosynthetic process; melanosome; purine ribonucleoside triphosphate biosynthetic process; ATP metabolic process; sodium ion transport; membrane raft; potassium ion transport; leukocyte migration; ion transmembrane transport; blood coagulation]                                                                                                                                                                                                                                                                                                                                                                                                                                                                                                                                                                                                                                                                                                                                                                                                                                                                                                                                                                                                                                                                                                                                                                                                                                                                                                                                                                                                                                                                                                                                                                                                                                                                                                                                                                                                                                                                                                                                                                                                                                                                                                                                                                                                                                                                                                                                            |
| u  | <b>BST2</b>    | 19:17502082-17516457<br>19p13.11 | bone marrow stromal cell antigen 2 [Source:HGNC Symbol;Acc:1119], type=processed_transcript,protein_coding,retained_intron, GO=[defense response to virus; late endosome; anchored to membrane; humoral immune response; positive regulation of I-kappaB kinase/NF-kappaB cascade; B cell activation; positive regulation of intracellular protein kinase cascade; endosome; protein homodimerization activity; protein dimerization activity; identical protein binding]                                                                                                                                                                                                                                                                                                                                                                                                                                                                                                                                                                                                                                                                                                                                                                                                                                                                                                                                                                                                                                                                                                                                                                                                                                                                                                                                                                                                                                                                                                                                                                                                                                                                                                                                                                                                                                                                                                                                                                                                                                                                                                                                                                                                                                                                                                                                                                                                                                                                                                                 |
| u  | <b>CD109</b>   | 6:74405508-74538040<br>6q13      | CD109 molecule [Source:HGNC Symbol;Acc:21685], type=processed_transcript,protein_coding, GO=[serine-type endopeptidase inhibitor activity; anchored to membrane; extracellular space]                                                                                                                                                                                                                                                                                                                                                                                                                                                                                                                                                                                                                                                                                                                                                                                                                                                                                                                                                                                                                                                                                                                                                                                                                                                                                                                                                                                                                                                                                                                                                                                                                                                                                                                                                                                                                                                                                                                                                                                                                                                                                                                                                                                                                                                                                                                                                                                                                                                                                                                                                                                                                                                                                                                                                                                                     |
| *  | <b>CD97</b>    | 19:14492213-14519531<br>19p13.12 | CD97 molecule [Source:HGNC Symbol;Acc:1711], type=protein_coding, GO=[neuropeptide signaling pathway; inflammatory response; calcium ion binding; extracellular space; G-protein coupled receptor activity]                                                                                                                                                                                                                                                                                                                                                                                                                                                                                                                                                                                                                                                                                                                                                                                                                                                                                                                                                                                                                                                                                                                                                                                                                                                                                                                                                                                                                                                                                                                                                                                                                                                                                                                                                                                                                                                                                                                                                                                                                                                                                                                                                                                                                                                                                                                                                                                                                                                                                                                                                                                                                                                                                                                                                                               |
| *  | <b>CHL1</b>    | 3:238279-451090 3p26.3           | cell adhesion molecule with homology to L1CAM (close homolog of L1) [Source:HGNC Symbol;Acc:1939], type=nonsense_mediated_decay,processed_transcript,protein_coding, GO=[adult locomotory behavior; neuron migration; cognition; apical part of cell; dendrite; axon guidance; cell morphogenesis involved in neuron differentiation; neuron projection morphogenesis; chemotaxis]                                                                                                                                                                                                                                                                                                                                                                                                                                                                                                                                                                                                                                                                                                                                                                                                                                                                                                                                                                                                                                                                                                                                                                                                                                                                                                                                                                                                                                                                                                                                                                                                                                                                                                                                                                                                                                                                                                                                                                                                                                                                                                                                                                                                                                                                                                                                                                                                                                                                                                                                                                                                        |
| *  | <b>FASN</b>    | 17:80036215-80056106<br>17q25.3  | fatty acid synthase [Source:HGNC Symbol;Acc:3594], type=protein_coding, GO=[enoyl-[acyl-carrier-protein] reductase (NADPH, B-specific) activity; 3-oxoacyl-[acyl-carrier-protein] reductase activity; [acyl-carrier-protein] S-acetyltransferase activity; 3-hydroxypalmitoyl-[acyl-carrier-protein] dehydratase activity; myristoyl-[acyl-carrier-protein] hydrolase activity; [acyl-carrier-protein] S-malonyltransferase activity; palmitoyl-[acyl-carrier-protein] hydrolase activity; 3-oxoacyl-[acyl-carrier-protein] synthase activity; oleoyl-[acyl-carrier-protein] hydrolase activity; phosphopantetheine binding; acyl carrier activity; glycogen granule; pantothenate metabolic process; long-chain fatty-acyl-CoA biosynthetic process; long-chain fatty-acyl-CoA metabolic process; triglyceride biosynthetic process; melanosome; vitamin binding; fatty acid biosynthetic process; energy reserve metabolic process; cofactor binding]                                                                                                                                                                                                                                                                                                                                                                                                                                                                                                                                                                                                                                                                                                                                                                                                                                                                                                                                                                                                                                                                                                                                                                                                                                                                                                                                                                                                                                                                                                                                                                                                                                                                                                                                                                                                                                                                                                                                                                                                                                   |
| d* | <b>GOT2</b>    | 16:58741035-58768239<br>16q21    | glutamic-oxaloacetic transaminase 2, mitochondrial (aspartate aminotransferase 2) [Source:HGNC Symbol;Acc:4433], type=protein_coding,retained_intron, GO=[L-aspartate:2-oxoglutarate aminotransferase activity; aspartate biosynthetic process; glutamate catabolic process to aspartate; glutamate catabolic process to 2-oxoglutarate; aspartate catabolic process; oxaloacetate metabolic process; aspartate family amino acid catabolic process; aspartate family amino acid biosynthetic process; aspartate family amino acid metabolic process; pyridoxal phosphate binding; gluconeogenesis; fatty acid transport; response to ethanol; vitamin binding; lipid transport; mitochondrial matrix; cofactor binding; mitochondrial inner membrane]                                                                                                                                                                                                                                                                                                                                                                                                                                                                                                                                                                                                                                                                                                                                                                                                                                                                                                                                                                                                                                                                                                                                                                                                                                                                                                                                                                                                                                                                                                                                                                                                                                                                                                                                                                                                                                                                                                                                                                                                                                                                                                                                                                                                                                    |
| u  | <b>GPR56</b>   | 16:57662419-57698944<br>16q21    | G protein-coupled receptor 56 [Source:HGNC Symbol;Acc:4512], type=protein_coding, GO=[neuropeptide signaling pathway; brain development; G-protein coupled receptor activity]                                                                                                                                                                                                                                                                                                                                                                                                                                                                                                                                                                                                                                                                                                                                                                                                                                                                                                                                                                                                                                                                                                                                                                                                                                                                                                                                                                                                                                                                                                                                                                                                                                                                                                                                                                                                                                                                                                                                                                                                                                                                                                                                                                                                                                                                                                                                                                                                                                                                                                                                                                                                                                                                                                                                                                                                             |
| *  | <b>HSPD1</b>   | 2:198351305-198381461<br>2q33.1  | heat shock 60kDa protein 1 (chaperonin) [Source:HGNC Symbol;Acc:5261], type=nonsense_mediated_decay,protein_coding,retained_intron, GO=[B cell cytokine production; T cell mediated immune response to tumor cell; regulation of T cell mediated immune response to tumor cell; positive regulation of T cell mediated immune response to tumor cell; lipopolysaccharide receptor complex; cyclin-dependent protein kinase activating kinase holoenzyme complex; DNA replication origin binding; positive regulation of interferon-alpha production; positive regulation of macrophage activation; isotype switching to IgG isotypes; chaperone-mediated protein complex assembly; lipopolysaccharide binding; protein refolding; positive regulation of interleukin-10 production; positive regulation of interleukin-12 production; positive regulation of interferon-gamma production; positive regulation of interleukin-6 production; p53 binding; chaperone binding; cell surface binding; coated pit; protein stabilization; 'de novo' protein folding; single-stranded DNA binding; B cell proliferation; response to unfolded protein; MyD88-dependent toll-like receptor signaling pathway; activation of caspase activity; ATP catabolic process; myeloid leukocyte activation; protein maturation; unfolded protein binding; early endosome; ATP metabolic process; positive regulation of T cell activation; B cell activation; response to protein stimulus; coated vesicle; stored secretory granule; mitochondrial matrix; mitochondrial inner membrane; cell surface; endosome; negative regulation of apoptosis; positive regulation of apoptosis; extracellular space]                                                                                                                                                                                                                                                                                                                                                                                                                                                                                                                                                                                                                                                                                                                                                                                                                                                                                                                                                                                                                                                                                                                                                                                                                                                                                                 |
| u* | <b>IGSF8</b>   | 1:160061130-160068733<br>1q23.2  | immunoglobulin superfamily, member 8 [Source:HGNC Symbol;Acc:17813], type=processed_transcript,protein_coding, GO=[single fertilization; skeletal muscle tissue development; striated muscle tissue development]                                                                                                                                                                                                                                                                                                                                                                                                                                                                                                                                                                                                                                                                                                                                                                                                                                                                                                                                                                                                                                                                                                                                                                                                                                                                                                                                                                                                                                                                                                                                                                                                                                                                                                                                                                                                                                                                                                                                                                                                                                                                                                                                                                                                                                                                                                                                                                                                                                                                                                                                                                                                                                                                                                                                                                          |
| u* | <b>ITGA6</b>   | 2:173292082-173371181<br>2q31.1  | integrin, alpha 6 [Source:HGNC Symbol;Acc:6142], type=protein_coding,retained_intron, GO=[alpha6-beta4 integrin complex; hemidesmosome assembly; laminin binding; positive regulation of cell-cell adhesion; brown fat cell differentiation; integrin complex; basal plasma membrane; cell adhesion mediated by integrin; cellular response to organic cyclic compound; cell-cell adherens junction; filopodium assembly; filopodium; positive regulation of cell-substrate adhesion; odontogenesis of dentine-containing tooth; integrin-mediated signaling pathway; integrin binding; basement membrane; positive regulation of cell adhesion; cell-matrix adhesion; external side of plasma membrane; adherens junction; regulation of cell adhesion; leukocyte migration; positive regulation of phosphorylation; cell-cell adhesion; cell surface; blood coagulation; negative regulation of apoptosis; positive regulation of apoptosis; positive regulation of transcription from RNA polymerase II promoter]                                                                                                                                                                                                                                                                                                                                                                                                                                                                                                                                                                                                                                                                                                                                                                                                                                                                                                                                                                                                                                                                                                                                                                                                                                                                                                                                                                                                                                                                                                                                                                                                                                                                                                                                                                                                                                                                                                                                                                      |
| *  | <b>ITGAV</b>   | 2:187454790-187545628<br>2q32.1  | integrin, alpha V (vitronectin receptor, alpha polypeptide, antigen CD51) [Source:HGNC Symbol;Acc:6150], type=processed_transcript,protein_coding,retained_intron, GO=[entry of bacterium into host cell; entry of symbiont into host cell by promotion of host phagocytosis; regulation of apoptotic cell clearance; negative regulation of low-density lipoprotein particle receptor biosynthetic process; positive regulation of osteoblast proliferation; negative regulation of lipoprotein metabolic process; opsonin binding; insulin-like growth factor I binding; transforming growth factor beta binding; negative regulation of macrophage derived foam cell differentiation; negative regulation of lipid storage; entry of virus into host cell; negative regulation of lipid transport; integrin complex; integrin-mediated signaling pathway; ERK1 and ERK2 cascade; positive regulation of cell adhesion; cell-matrix adhesion; external side of plasma membrane; positive regulation of cell migration; lipid transport; regulation of cell adhesion; leukocyte migration; negative regulation of cell differentiation; axon guidance; cell surface; blood coagulation; negative regulation of apoptosis; cell morphogenesis involved in neuron differentiation; neuron projection morphogenesis; chemotaxis]                                                                                                                                                                                                                                                                                                                                                                                                                                                                                                                                                                                                                                                                                                                                                                                                                                                                                                                                                                                                                                                                                                                                                                                                                                                                                                                                                                                                                                                                                                                                                                                                                                                            |
| *  | <b>ITGB1</b>   | 10:33189247-33294720<br>10p11.22 | integrin, beta 1 (fibronectin receptor, beta polypeptide, antigen CD29 includes MDF2, MSK12) [Source:HGNC Symbol;Acc:6153], type=nonsense_mediated_decay,processed_transcript,protein_coding,retained_intron, GO=[alpha3-beta1 integrin complex; protein transport within lipid bilayer; alpha9-beta1 integrin complex; hemidesmosome; alpha-actinin binding; cell-cell adhesion mediated by integrin; cellular response to vitamin D; cell migration involved in sprouting angiogenesis; germ cell migration; sarcomere organization; intercalated disc; fibronectin binding; laminin binding; response to gonadotropin stimulus; maternal process involved in female pregnancy; response to transforming growth factor beta stimulus; cellular response to ionizing radiation; integrin complex; cleavage furrow; basal plasma membrane; myelin sheath; tight junction assembly; cell adhesion mediated by integrin; leukocyte cell-cell adhesion; neuromuscular junction; positive regulation of neuron projection development; ruffle membrane; protease binding; response to activity; collagen binding; cardiac muscle cell differentiation; positive regulation of cell-substrate adhesion; cellular response to mechanical stimulus; glycoprotein binding; negative regulation of neuron differentiation; acrosomal vesicle; negative regulation of cell projection organization; positive regulation of neuron differentiation; cellular defense response; cell fate specification; integrin-mediated signaling pathway; cellular response to protein stimulus; B cell differentiation; integrin binding; regulation of G-protein coupled receptor protein signaling pathway; sarcolemma; basement membrane; positive regulation of peptidyl-tyrosine phosphorylation; melanosome; tissue homeostasis; focal adhesion; positive regulation of cell adhesion; synapsome; positive regulation of cell projection organization; cell-matrix adhesion; positive regulation of MAPKKK cascade; homophilic cell adhesion; adherens junction; membrane raft; B cell activation; response to protein stimulus; positive regulation of cell migration; G1/S transition of mitotic cell cycle; regulation of cell adhesion; peptide binding; leukocyte migration; stored secretory granule; striated muscle tissue development; positive regulation of phosphorylation; cellular calcium ion homeostasis; protein heterodimerization activity; protein kinase binding; in utero embryonic development; positive regulation of intracellular protein kinase cascade; actin binding; cell-cell adhesion; negative regulation of cell differentiation; response to drug; axon guidance; cell surface; negative regulation of cell proliferation; blood coagulation; cell morphogenesis involved in neuron differentiation; positive regulation of apoptosis; neuron projection morphogenesis; chemotaxis; regulation of cell cycle; protein dimerization activity; identical protein binding] |

Continued on next page...

| S  | name          | locus                            | description                                                                                                                                                                                                                                                                                                                                                                                                                                                                                                                                                                                                                                                                                                                                                                                                                                                                                                                                                                                                                                                                                                                                                                                                                                                    |
|----|---------------|----------------------------------|----------------------------------------------------------------------------------------------------------------------------------------------------------------------------------------------------------------------------------------------------------------------------------------------------------------------------------------------------------------------------------------------------------------------------------------------------------------------------------------------------------------------------------------------------------------------------------------------------------------------------------------------------------------------------------------------------------------------------------------------------------------------------------------------------------------------------------------------------------------------------------------------------------------------------------------------------------------------------------------------------------------------------------------------------------------------------------------------------------------------------------------------------------------------------------------------------------------------------------------------------------------|
|    | <b>MTR</b>    | 1:236958581-237067281<br>1q43    | 5-methyltetrahydrofolate-homocysteine methyltransferase [Source:HGNC Symbol;Acc:7468], type=processed_transcript,protein_coding, GO=[methionine synthase activity; homocysteine S-methyltransferase activity; homocysteine metabolic process; cobalamin binding; tetrahydrofolate metabolic process; methionine biosynthetic process; folic acid binding; aspartate family amino acid biosynthetic process; aspartate family amino acid metabolic process; protein methylation; vitamin binding; xenobiotic metabolic process; soluble fraction]                                                                                                                                                                                                                                                                                                                                                                                                                                                                                                                                                                                                                                                                                                               |
| d* | <b>NME1</b>   | 17:49230897-49239789<br>17q21.33 | non-metastatic cells 1, protein (NM23A) expressed in [Source:HGNC Symbol;Acc:7849], type=nonsense_mediated_decay,protein_coding,retained_intron, GO=[nucleoside diphosphate kinase activity; nucleoside diphosphate phosphorylation; GTP biosynthetic process; UTP biosynthetic process; CTP biosynthetic process; gamma-tubulin binding; nucleobase, nucleoside and nucleotide interconversion; negative regulation of myeloid leukocyte differentiation; deoxyribonuclease activity; response to cAMP; purine ribonucleoside triphosphate biosynthetic process; positive regulation of epithelial cell proliferation; positive regulation of DNA binding; magnesium ion binding; intermediate filament; centrosome; GTP binding; negative regulation of cell differentiation; response to drug; perinuclear region of cytoplasm; negative regulation of cell proliferation; identical protein binding]                                                                                                                                                                                                                                                                                                                                                       |
| u  | <b>PROCR</b>  | 20:33758727-33765165<br>20q11.22 | protein C receptor, endothelial [Source:HGNC Symbol;Acc:9452], type=protein_coding, GO=[MHC class I protein complex; antigen processing and presentation; centrosome; blood coagulation]                                                                                                                                                                                                                                                                                                                                                                                                                                                                                                                                                                                                                                                                                                                                                                                                                                                                                                                                                                                                                                                                       |
| u* | <b>PTGFRN</b> | 1:117452679-117532980<br>1p13.1  | prostaglandin F2 receptor negative regulator [Source:HGNC Symbol;Acc:9601], type=processed_transcript,protein_coding, GO=[lipid particle organization; endoplasmic reticulum membrane]                                                                                                                                                                                                                                                                                                                                                                                                                                                                                                                                                                                                                                                                                                                                                                                                                                                                                                                                                                                                                                                                         |
| u* | <b>PTPRF</b>  | 1:43990858-44089343<br>1p34.2    | protein tyrosine phosphatase, receptor type, F [Source:HGNC Symbol;Acc:9670], type=processed_transcript,protein_coding, GO=[negative regulation of nerve growth factor receptor signaling pathway; transmembrane receptor protein tyrosine phosphatase signaling pathway; phosphate binding; positive regulation of dendrite morphogenesis; excitatory synapse; transmembrane receptor protein tyrosine phosphatase activity; negative regulation of insulin receptor signaling pathway; negative regulation of cytokine-mediated signaling pathway; receptor tyrosine kinase binding; insulin receptor binding; positive regulation of neuron apoptosis; negative regulation of epidermal growth factor receptor signaling pathway; regulation of synapse structure and activity; negative regulation of cell projection organization; peptidyl-tyrosine dephosphorylation; growth cone; epidermal growth factor receptor signaling pathway; positive regulation of cell projection organization; homophilic cell adhesion; neuronal cell body; microsome; cell-cell adhesion; endosome; negative regulation of cell proliferation; cell morphogenesis involved in neuron differentiation; positive regulation of apoptosis; neuron projection morphogenesis] |
| u* | <b>TUBA1C</b> | 12:49582519-49667116<br>12q13.12 | tubulin, alpha 1c [Source:HGNC Symbol;Acc:20768], type=nonsense_mediated_decay,processed_transcript,protein_coding,retained_intron, GO=[cytoplasmic microtubule; cytoskeleton-dependent intracellular transport; 'de novo' posttranslational protein folding; 'de novo' protein folding; microtubule-based movement; protein polymerization; GTPase activity; GTP binding; cell division; GTP catabolic process; structural molecule activity]                                                                                                                                                                                                                                                                                                                                                                                                                                                                                                                                                                                                                                                                                                                                                                                                                 |

Table 10: Descriptions of the study identifiers. The numbers of results reported and their units are reported in *hits* and *score type* columns, respectively.

| name              | description                                                                                   | ref      | id    | hits | score type      |
|-------------------|-----------------------------------------------------------------------------------------------|----------|-------|------|-----------------|
| cosmicMetastasis  | Consists of frequent somatic mutations in metastasis tumours as reported in COSMIC database.  | [6]      | 20500 | 370  | Proportion      |
| cosmicPrimary     | Consists of frequent somatic mutations in primary tumours as reported in COSMIC database.     | [6]      | 20501 | 140  | Proportion      |
| cosmicRecurrent   | Consists of frequent somatic mutations in recurrent tumours as reported in COSMIC database.   | [6]      | 20502 | 230  | Proportion      |
| fileAmpOver       | Amplified and overexpressed genes in human cancer.                                            | [14]     | 21008 | 77   | Ascending rank  |
| fileBC2brain      | Set of differentially expressed genes related to brain metastases of the breast cancer tumor. | [3]      | 21000 | 26   | Fold change     |
| fileCIN70         | Set of genes associated with chromosomal instability.                                         | [4]      | 21005 | 70   | Ascending rank  |
| snp3dBC           | Genes associated to 'BREAST CANCER' in PUBMED abstracts.                                      | [17]     | 20001 | 43   | Descending rank |
| snp3dCRC          | Genes associated to 'COLORECTAL CANCER' in PUBMED abstracts.                                  | [17]     | 20002 | 29   | Descending rank |
| snp3dDementia     | Genes associated to 'DEMENTIA' in PUBMED abstracts.                                           | [17]     | 20007 | 47   | Descending rank |
| snp3dDiabetes     | Genes associated to 'DIABETES MELLITUS' in PUBMED abstracts.                                  | [17]     | 20003 | 63   | Descending rank |
| snp3dGlioma       | Genes associated to 'GLIOMA' in PUBMED abstracts.                                             | [17]     | 20006 | 80   | Descending rank |
| snp3dLungC        | Genes associated to 'LUNG CANCER' in PUBMED abstracts.                                        | [17]     | 20005 | 80   | Descending rank |
| snp3dMetastasis   | Genes associated to 'METASTASIS' in PUBMED abstracts.                                         | [17]     | 20009 | 73   | Descending rank |
| snp3dObesity      | Genes associated to 'OBESITY' in PUBMED abstracts.                                            | [17]     | 20008 | 49   | Descending rank |
| snp3dProstateC    | Genes associated to 'PROSTATE CANCER' in PUBMED abstracts.                                    | [17]     | 20004 | 58   | Descending rank |
| tcgaBreastCGHa    | CGH gains in TCGA Breast samples                                                              | [13]     | 22043 | 172  | Proportion      |
| tcgaBreastCGHd    | CGH losses in TCGA Breast samples                                                             | [13]     | 22044 | 70   | Proportion      |
| tcgaBreastGE      | Differentially expressed genes in TCGA Breast samples                                         | [13]     | 22040 | 9546 | Fold change     |
| tcgaBreastGESurv  | Genes with survival associated expressions in TCGA Breast samples                             | [13]     | 22041 | 185  | Probability     |
| tcgaBreastMethyl  | Differentially methylated genes in TCGA Breast samples                                        | [13]     | 22042 | 6527 | Fold change     |
| tcgaColonCGHa     | CGH gains in TCGA Colon samples                                                               | [13]     | 22063 | 41   | Proportion      |
| tcgaColonCGHd     | CGH losses in TCGA Colon samples                                                              | [13]     | 22064 | 78   | Proportion      |
| tcgaColonGE       | Differentially expressed genes in TCGA Colon samples                                          | [13]     | 22060 | 8434 | Fold change     |
| tcgaColonGESurv   | Genes with survival associated expressions in TCGA Colon samples                              | [13]     | 22061 | 11   | Probability     |
| tcgaColonMethyl   | Differentially methylated genes in TCGA Colon samples                                         | [13]     | 22062 | 7282 | Fold change     |
| tcgaGliomaCGHa    | CGH gains in TCGA Glioma samples                                                              | [13, 12] | 22023 | 25   | Proportion      |
| tcgaGliomaCGHd    | CGH losses in TCGA Glioma samples                                                             | [13, 12] | 22024 | 469  | Proportion      |
| tcgaGliomaGE      | Differentially expressed genes in TCGA Glioma samples                                         | [13, 12] | 22020 | 6593 | Fold change     |
| tcgaGliomaGESurv  | Genes with survival associated expressions in TCGA Glioma samples                             | [13, 12] | 22021 | 130  | Probability     |
| tcgaOvarianCGHa   | CGH gains in TCGA Ovarian samples                                                             | [11]     | 22003 | 535  | Proportion      |
| tcgaOvarianCGHd   | CGH losses in TCGA Ovarian samples                                                            | [11]     | 22004 | 148  | Proportion      |
| tcgaOvarianGE     | Differentially expressed genes in TCGA Ovarian samples                                        | [11]     | 22000 | 625  | Fold change     |
| tcgaOvarianGESurv | Genes with survival associated expressions in TCGA Ovarian samples                            | [11]     | 22001 | 28   | Probability     |
| tcgaOvarianMethyl | Differentially methylated genes in TCGA Ovarian samples                                       | [11]     | 22002 | 7056 | Fold change     |
| tscapeBCa         | Frequent chromosomal amplifications in Breast tumours                                         | [2]      | 20600 | 1095 | Proportion      |
| tscapeBCd         | Frequent chromosomal deletions in Breast tumours                                              | [2]      | 20601 | 2326 | Proportion      |
| tscapeCRCa        | Frequent chromosomal amplifications in Colorectal tumours                                     | [2]      | 20602 | 386  | Proportion      |
| tscapeCRCd        | Frequent chromosomal deletions in Colorectal tumours                                          | [2]      | 20603 | 1094 | Proportion      |
| tscapeGliomaa     | Frequent chromosomal amplifications in Glioma tumours                                         | [2]      | 20604 | 25   | Proportion      |
| tscapeGliomad     | Frequent chromosomal deletions in Glioma tumours                                              | [2]      | 20605 | 253  | Proportion      |
| tscapeHCCa        | Frequent chromosomal amplifications in Hepatocellular tumours                                 | [2]      | 20616 | 444  | Proportion      |
| tscapeHCCd        | Frequent chromosomal deletions in Hepatocellular tumours                                      | [2]      | 20617 | 941  | Proportion      |
| tscapeMelanomaa   | Frequent chromosomal amplifications in Melanoma tumours                                       | [2]      | 20610 | 555  | Proportion      |
| tscapeMelanomad   | Frequent chromosomal deletions in Melanoma tumours                                            | [2]      | 20611 | 685  | Proportion      |
| tscapeNSCLCa      | Frequent chromosomal amplifications in Lung NSC tumours                                       | [2]      | 20606 | 1340 | Proportion      |
| tscapeNSCLCd      | Frequent chromosomal deletions in Lung NSC tumours                                            | [2]      | 20607 | 2211 | Proportion      |
| tscapeOvariana    | Frequent chromosomal amplifications in Ovarian tumours                                        | [2]      | 20612 | 1188 | Proportion      |
| tscapeOvariand    | Frequent chromosomal deletions in Ovarian tumours                                             | [2]      | 20613 | 2111 | Proportion      |
| tscapeProstatea   | Frequent chromosomal amplifications in Prostate tumours                                       | [2]      | 20614 | 171  | Proportion      |
| tscapeProstatec   | Frequent chromosomal deletions in Prostate tumours                                            | [2]      | 20615 | 1181 | Proportion      |
| tscapeRCCa        | Frequent chromosomal amplifications in Renal tumours                                          | [2]      | 20618 | 392  | Proportion      |
| tscapeRCCd        | Frequent chromosomal deletions in Renal tumours                                               | [2]      | 20619 | 945  | Proportion      |
| tscapeSCLCa       | Frequent chromosomal amplifications in Lung SC tumours                                        | [2]      | 20608 | 331  | Proportion      |
| tscapeSCLCd       | Frequent chromosomal deletions in Lung SC tumours                                             | [2]      | 20609 | 573  | Proportion      |

### 3 System configuration

#### Pipeline configuration

#### 3.1 System configurations

The following table shows the properties of **ensembl** component.

| property         | value                                                   |
|------------------|---------------------------------------------------------|
| database.driver  | com.mysql.jdbc.Driver                                   |
| database.recycle | true                                                    |
| database.timeout | 20                                                      |
| database.url     | jdbc:mysql://deebee.giu.fi:3306/homo_sapiens_core_64_37 |
| database.user    | anonymous                                               |

The following table shows the properties of **moksiskaanInit-init** component.

| property         | value                      |
|------------------|----------------------------|
| database.driver  | org.postgresql.Driver      |
| database.recycle | true                       |
| database.timeout | 20                         |
| database.url     | jdbc:postgresql:moksiskaan |
| database.user    | moksiskaan                 |

This analysis is based on Moksiskaan [10] (version 1.08) that is running on top of Hibernate with *org.hibernate.dialect.PostgreSQLDialect* to access the native database.



Database history:

[2011-04-08] EnsemblImport: *jdbc:mysql://deebee.giu.fi:3306/mus\_musculus\_core\_61-37n (29136 genes, 15661 proteins)* See also [7].

[2011-04-08] EnsemblImport: *jdbc:mysql://deebee.giu.fi:3306/homo\_sapiens\_core\_61-37f (33615 genes, 18881 proteins)* See also [7].

[2011-04-09] Keggonen: *KEGG pathway import from {SOAP/KEGG}KEGG: http://soap.genome.jp/keggapi/request.v6.2.cgi produced 230 Homo sapiens pathways.* See also [8].

[2011-04-09] Keggonen: *KEGG pathway import from {SOAP/KEGG}KEGG: http://soap.genome.jp/keggapi/request.v6.2.cgi produced 226 Mus musculus pathways.* See also [8].

[2011-04-09] Narggari: *Drug target import from the KEGG DRUG database.* See also [8].

[2011-04-09] DrugBankImport: *Total of 1619 drugs identified from http://www.drugbank.ca/system/downloads/current/drugbank.xml.zip.* See also [9, 15].

[2011-04-09] PINAImport: *Total of 4496 protein-protein interactions obtained from http://csbi.ltdk.helsinki.fi/pina/download/Mus%20musculus.txt.* See also [16].

[2011-04-09] PINAImport: *Total of 52462 protein-protein interactions obtained from http://csbi.ltdk.helsinki.fi/pina/download/Homo%20sapiens.txt.* See also [16].

[2011-04-09] PathwayCommonsImport: *Total of 35 new links obtained from http://www.pathwaycommons.org/pc-snapshot/current-release/tab\_delim\_network/by-species/mus-musculus-10090-edge-attributes.txt.zip.* See also [5].

[2011-04-09] PathwayCommonsImport: *Total of 59555 new links obtained from http://www.pathwaycommons.org/pc-snapshot/current-release/tab\_delim\_network/by-species/homo-sapiens-9606-edge-attributes.txt.zip.* See also [5].

## References

- [1] M. Ashburner, C. A. Ball, J. A. Blake, D. Botstein, H. Butler, J. M. Cherry, A. P. Davis, K. Dolinski, S. S. Dwight, and J. T. Eppig. Gene ontology: tool for the unification of biology. The Gene Ontology Consortium. *Nat Genet*, 25(1):25–29, 2000.
- [2] R. Beroukhi, C. H. Mermel, D. Porter, G. Wei, S. Raychaudhuri, J. Donovan, J. Barretina, J. S. Boehm, J. Dobson, M. Urashima, K. T. Mc Henry, R. M. Pinchback, A. H. Ligon, Y.-J. Cho, L. Haery, H. Greulich, M. Reich, W. Winckler, M. S. Lawrence, B. A. Weir, K. E. Tanaka, D. Y. Chiang, A. J. Bass, A. Loo, C. Hoffman, J. Prensner, T. Liefeld, Q. Gao, D. Yecies, S. Signoretti, E. Maher, F. J. Kaye, H. Sasaki, J. E. Tepper, J. A. Fletcher, J. Taberner, J. Baselga, M.-S. Tsao, F. Demichelis, M. A. Rubin, P. A. Janne, M. J. Daly, C. Nucera, R. L. Levine, B. L. Ebert, S. Gabriel, A. K. Rustgi, C. R. Antonescu, M. Ladanyi, A. Letai, L. A. Garraway, M. Loda, D. G. Beer, L. D. True, A. Okamoto, S. L. Pomeroy, S. Singer, T. R. Golub, E. S. Lander, G. Getz, W. R. Sellers, and M. Meyerson. The landscape of somatic copy-number alteration across human cancers. *Nature*, 463(7283):899–905, 2010.
- [3] P. Bos, H. Xiang, C. Nadal, W. Shu, R. Gomis, D. Nguyen, A. Minn, M. Van de Vijver, W. Gerald, J. Foekens, et al. Genes that mediate breast cancer metastasis to the brain. *Nature*, 459(7249):1005, 2009.
- [4] S. Carter, A. Eklund, I. Kohane, L. Harris, and Z. Szallasi. A signature of chromosomal instability inferred from gene expression profiles predicts clinical outcome in multiple human cancers. *Nature genetics*, 38(9):1043–1048, 2006.
- [5] M. S.-K. C. Center and the University of Toronto. Pathway commons::home, 2010. <http://www.pathwaycommons.org/pc/home.do>. [1.12.2010].
- [6] S. Forbes, G. Bhamra, S. Bamford, E. Dawson, C. Kok, J. Clements, A. Menzies, J. Teague, P. Futreal, and M. Stratton. The catalogue of somatic mutations in cancer (COSMIC). *Current protocols in human genetics*, Chapter 10, 2008.
- [7] T. J. P. Hubbard, B. L. Aken, S. Ayling, B. Ballester, K. Beal, E. Bragin, S. Brent, Y. Chen, P. Clapham, L. Clarke, et al. Ensembl 2009. *Nucleic acids research*, 37(Database issue):D690, 2009.
- [8] M. Kanehisa, S. Goto, M. Furumichi, M. Tanabe, and M. Hirakawa. KEGG for representation and analysis of molecular networks involving diseases and drugs. *Nucleic acids research*, 2009.
- [9] C. Knox, V. Law, T. Jewison, P. Liu, S. Ly, A. Frolkis, A. Pon, K. Banco, C. Mak, V. Neveu, et al. DrugBank 3.0: a comprehensive resource for Omics research on drugs. *Nucleic Acids Research*, 39(suppl 1):D1035, 2011.
- [10] M. Laakso and S. Hautaniemi. Integrative platform to translate gene sets to networks. *Bioinformatics*, 26:1802–1803, 7 2010.
- [11] R. Louhimo and S. Hautaniemi. CNAmets: an R package for integrating copy number, methylation and expression data. *Bioinformatics*, 27(6):887–888, 2011.
- [12] R. McLendon, A. Friedman, D. Bigner, E. Van Meir, D. Brat, G. Mastrogiannis, J. Olson, T. Mikkelsen, N. Lehman, K. Aldape, et al. Comprehensive genomic characterization defines human glioblastoma genes and core pathways. *Nature*, 455(7216):1061–1068, 2008.
- [13] K. Ovaska, M. Laakso, S. Haapa-Paananen, R. Louhimo, P. Chen, V. Aittomäki, E. Valo, J. Núñez-Fontarnau, V. Rantanen, S. Karinen, K. Nousiainen, A.-M. Lahesmaa-Korpinen, M. Miettinen, L. Saarinen, P. Kohonen, J. Wu, J. Westermarck, and S. Hautaniemi. Large-scale data integration framework provides a comprehensive view on glioblastoma multiforme. *Genome Medicine*, 2(9):65, September 2010.
- [14] T. Santarius, J. Shipley, D. Brewer, M. Stratton, and C. Cooper. A census of amplified and overexpressed human cancer genes. *Nature Reviews Cancer*, 10(1):59–64, 2010.

- [15] D. Wishart, C. Knox, A. Guo, D. Cheng, S. Shrivastava, D. Tzur, B. Gautam, and M. Hassanali. DrugBank: a knowledgebase for drugs, drug actions and drug targets. *Nucleic acids research*, 36:D901–D906, 2008.
- [16] J. Wu, T. Vallenius, K. Ovaska, J. Westermarck, T. P. Mäkelä, and S. Hautaniemi. Integrated network analysis platform for protein-protein interactions. *Nature methods*, 6(1):75–77, 2009.
- [17] P. Yue, E. Melamud, and J. Moul. SNPs3D: candidate gene and SNP selection for association studies. *BMC Bioinformatics*, 7(1):166, 2006.
